# Supplementary material for: Evidence gaps and biodiversity threats facing the marine environment of the United Kingdom’s Overseas Territories
Source: Springer Nature journal article supplement (doi:10.1007/s10531-018-1660-5), 2018-11-28
Supplement: MOESM1 [file 16302680]

## Sheet: Table S1
Reference	Publication Date	Territory 1	Territory 2	Territory 3	Territory 4	Territory 5	Territory 6	Territory 7	Region	Main Discipline/focus	Biological Group	Additional Information
Xavier, J. C., et al. (2007). "Interannual variations in cephalopod consumption by albatrosses at South Georgia: implications for future commercial exploitation of cephalopods." Marine and Freshwater Research 58(12): 1136-1143.	2007	SGSSI	NA	NA	NA	NA	NA	NA	Southern Ocean	Ecology	Seabirds	Assessed interannual consumption of cephalopods by grey-headed and black-browed albatrosses while breeding at South Georgia between 1996 and 2000
Xavier, J. C. and J. P. Croxall (2007). "Predator-prey interactions: why do larger albatrosses eat bigger squid?" Journal of Zoology 271(4): 408-417.	2007	SGSSI	NA	NA	NA	NA	NA	NA	Southern Ocean	Biology	Seabirds	Investigated how body size of the grey-headed albatross Thalassarche chrysostoma, the black-browed albatross Thalassarche melanophrys and the wandering albatross Diomedea exulans relates to the size of cephalopod prey
Wynne, S. P. and I. M. Cote (2007). "Effects of habitat quality and fishing on Caribbean spotted spiny lobster populations." Journal of Applied Ecology 44(3): 488-494.	2007	Anguilla	NA	NA	NA	NA	NA	NA	Caribbean	Ecology	Crustacea	Assessed the effects of fishing and habitat quality on spotted spiny lobster Panulirus guttatus
Wright, P. J., et al. (2007). "New species of Antarctothoa (Cheilostomata: Hippothoidae) from the Falkland Isles, South Shetland Isles and the Magellan Strait." Journal of the Marine Biological Association of the United Kingdom 87(5): 1133-1140.	2007	Falkland Islands	BAT	SGSSI	NA	NA	NA	NA	South Atlantic, Southern Ocean	Taxonomy	Bryozoa	Four new species of bryozoa described
Ward, P., et al. (2007). "Plankton community structure south and west of South Georgia (Southern Ocean): Links with production and physical forcing." Deep-Sea Research Part I-Oceanographic Research Papers 54(11): 1871-1889.	2007	SGSSI	NA	NA	NA	NA	NA	NA	Southern Ocean	Ecology	Plankton	Investigated plankton community to the south and west of South Georgia
Wanless, R. M., et al. (2007). "Can predation by invasive mice drive seabird extinctions?" Biology Letters 3(3): 241-244.	2007	Tristan	NA	NA	NA	NA	NA	NA	South Atlantic	Threat	Seabirds	Predatory effects of house mice on Tristan albatross, great shearwater and Atlantic petrel chicks
von der Heyden, S., et al. (2007). "Long current to nowhere? - Genetic connectivity of Jasus tristani populations in the southern Atlantic Ocean." African Journal of Marine Science 29(3): 491-497.	2007	Tristan	NA	NA	NA	NA	NA	NA	South Atlantic	Genetics	Crustacea	Genetic connectivity of spiny lobster populations
Thorpe, S. E., et al. (2007). "Circumpolar connections between Antarctic krill (Euphausia superba Dana) populations: Investigating the roles of ocean and sea ice transport." Deep-Sea Research Part I-Oceanographic Research Papers 54(5): 792-810.	2007	SGSSI	BAT	NA	NA	NA	NA	NA	Southern Ocean	Ecology	Plankton	Model parameterising sea ice and ocean ciculation to examine effect on krill distribution
Tarling, G. A., et al. (2007). "Recruitment of Antarctic krill Euphausia superba in the South Georgia region: adult fecundity and the fate of larvae." Marine Ecology Progress Series 331: 161-179.	2007	SGSSI	NA	NA	NA	NA	NA	NA	Southern Ocean	Biology	Plankton	Reproduction/early stage development in Antarctic krill around South Georgia
Stoll, H. M., et al. (2007). "Relationship between coccolith Sr/Ca ratios and coccolithophore production and export in the Arabian Sea and Sargasso Sea." Deep-Sea Research Part Ii-Topical Studies in Oceanography 54(5-7): 581-600.	2007	Bermuda	NA	NA	NA	NA	NA	NA	North-western Atlantic	Biogeochemistry	Plankton	Relationship between coccolith Sr/Ca ratios and productivity
Sheppard, C. R. C. (2007). "Effects of the tsunami in the Chagos Archipelago." Atoll Research Bulletin(544): 135-148.	2007	BIOT	NA	NA	NA	NA	NA	NA	Indian Ocean	Ecology	Anthozoa	Brief survey/observations of effects of tsunami across Chagos
Semeniuk, C. A. D., et al. (2007). "Using fatty-acid profile analysis as an ecologic indicator in the management of tourist impacts on marine wildlife: A case of stingray-feeding in the Caribbean." Environmental Management 40(4): 665-677.	2007	Cayman Islands	NA	NA	NA	NA	NA	NA	Caribbean	Management	Fish	Assessed the fatty acid composition of fed vs unfed Southern stingrays
Schneider, C. W. and C. E. Lane (2007). "Notes on the marine algae of the Bermudas. 8. Further additions to the flora, including Griffithsia aestivana sp nov (Ceramiaceae, Rhodophyta) and an update on the alien Cystoseira compressa (Sargassaceae, Heterokontophyta)." Botanica Marina 50(2): 128-140.	2007	Bermuda	NA	NA	NA	NA	NA	NA	Caribbean	Taxonomy	Macroalgae	Decription of algae reported from Bermuda for the first time
Ryan, P. G., et al. (2007). "Breeding frequency in Grey-headed Albatrosses Thalassarche chrysostoma." Ibis 149(1): 45-52.	2007	SGSSI	NA	NA	NA	NA	NA	NA	Southern Ocean	Biology	Seabirds	Breeding frequency of grey-headed albatross
Ryan, P. G., et al. (2007). "Two-egg clutches among albatrosses." Emu 107(3): 210-213.	2007	Tristan	NA	NA	NA	NA	NA	NA	South Atlantic	Biology	Seabirds	Report incidence of two egg clutches for Atlantic Yellow-nosed Albatrosses (Thalassarche chlororhynchos), Grey-headed (T. chrysostoma), Wandering (Diomedea exulans) and Tristan (D. dabbenena)
Rossi-Santos, M. R., et al. (2007). "Cetacean sightings near South Georgia islands, South Atlantic Ocean." Polar Biology 31(1): 63-68.	2007	SGSSI	NA	NA	NA	NA	NA	NA	Southern Ocean	Distribution	Mammalia	Cetacean observations around South Georgia during research cruise
Roa-Ureta, R. and A. I. Arkhipkin (2007). "Short-term stock assessment of Loligo gahi at the Falkland Islands: Sequential use of stochastic biomass projection and stock depletion models." Ices Journal of Marine Science 64(1): 3-17.	2007	Falkland Islands	NA	NA	NA	NA	NA	NA	South Atlantic	Management	Cephalopoda	Two short-term stock assessment models are combined to examine the pre-season, in-season, and post-season dynamics of the Loligo gahi fishery off the Falkland Islands over four consecutive fishing seasons
Reid, W. D. K., et al. (2007). "Egg development, hatching rhythm and moult patterns in Paralomis spinosissima (Decapoda : Anomura : Paguroidea : Lithodidae) from South Georgia waters (Southern Ocean)." Polar Biology 30(9): 1213-1218.	2007	SGSSI	NA	NA	NA	NA	NA	NA	Southern Ocean	Biology	Crustacea	Egg development, hatching rhythm and moult patterns in Paralomis spinosissima
Reid, W. D. K., et al. (2007). "Distribution and ecology of Chaenocephalus aceratus (Channichthyidae) around South Georgia and Shag Rocks (Southern Ocean)." Polar Biology 30(12): 1523-1533.	2007	SGSSI	NA	NA	NA	NA	NA	NA	Southern Ocean	Ecology	Fish	Biomass, distribution, growth and diet of Chaenocephalus aceratus
Reid, T. A., et al. (2007). "The White-chinned Petrel Procellaria aequinoctialis population of the Falkland Islands." Marine Ornithology 35(1): 57-60.	2007	Falkland Islands	NA	NA	NA	NA	NA	NA	South Atlantic	Biology	Seabirds	Results of a survey of all known colonies of the White-chinned Petrel Procellaria aequinoctialis within the Falkland Islands
Reid, K., et al. (2007). "The power of ecosystem monitoring." Aquatic Conservation-Marine and Freshwater Ecosystems 17: S79-S92.	2007	SGSSI	NA	NA	NA	NA	NA	NA	Southern Ocean	Management	Comprehensive	Model parameterised with long term monitoring data to examine whether the impact of fishing krill can be detected
Quillfeldt, P., et al. (2007). "Male and female contributions to provisioning rates of thin-billed prions, Pachyptila belcheri, in the South Atlantic." Journal of Ornithology 148(3): 367-372.	2007	Falkland Islands	NA	NA	NA	NA	NA	NA	South Atlantic	Biology	Seabirds	Provisioning patterns of male and female thin-billed prions
Quilifeldt, P., et al. (2007). "Sea surface temperatures and behavioural buffering capacity in thin-billed prions Pachyptila belcheri: breeding success, provisioning and chick begging." Journal of Avian Biology 38(3): 298-308.	2007	Falkland Islands	NA	NA	NA	NA	NA	NA	South Atlantic	Biology	Seabirds	Provisioning rates and chick growth as well as hatching and fledging success, in thin-billed prions Pachyptila belcheri
Primo, C. and E. Vaquez (2007). "Zoogeography of the Antarctic ascidian fauna in relation to the sub-Antarctic and South America." Antarctic Science 19(3): 321-336.	2007	Falkland Islands	SGSSI	BAT	Tristan	NA	NA	NA	South Atlantic, Southern Ocean	Biogeography	Plankton	Presence/absence of ascidians used to inform biogeography
Phillips, R. A., et al. (2007). "Movements, winter distribution and activity patterns of Falkland and brown skuas: insights from loggers and isotopes." Marine Ecology Progress Series 345: 281-291.	2007	Falkland Islands	SGSSI	NA	NA	NA	NA	NA	South Atlantic, Southern Ocean	Distribution	Seabirds	Wintering ranges and activity patterns of brown and Falkland skuas
Patenaude, N. J., et al. (2007). "Mitochondrial DNA diversity and population structure among southern right whales (Eubalaena australis)." Journal of Heredity 98(2): 147-157.	2007	SGSSI	NA	NA	NA	NA	NA	NA	Southern Ocean	Genetics	Mammalia	Population structure and mitochondrial (mt) DNA diversity of southern right whales (Eubalaena australis)
Papetti, C., et al. (2007). "Microsatellite analysis reveals genetic differentiation between year-classes in the icefish Chaenocephalus aceratus at South Shetlands and Elephant Island." Polar Biology 30(12): 1605-1613.	2007	BAT	NA	NA	NA	NA	NA	NA	Southern Ocean	Genetics	Fish	Genetic differentiation for 11 microsatellite loci in C. aceratus
Otley, H. M., et al. (2007). "Trends in seabird and Patagonian Toothfish Dissostichus eleginoides longliner interactions in Falkland Island waters, 2002/03 and 2003/04." Marine Ornithology 35(1): 47-55.	2007	Falkland Islands	NA	NA	NA	NA	NA	NA	South Atlantic	Threat	Seabirds	Seabird bycatch with vessels fishing for Patagonian toothfish
Otley, H., et al. (2007). "Origin, age, sex and breeding status of wandering albatrosses (Diomedea exulans), northern (Macronectes halli) and southern giant petrels (Macronectes giganteus) attending demersal longliners in Falkland Islands and Scotia Ridge waters, 2001-2005." Polar Biology 30(3): 359-368.	2007	Falkland Islands	NA	NA	NA	NA	NA	NA	South Atlantic	Biology	Seabirds	Observation and description of birds attending fishing vessels
Otley, H., et al. (2007). "Breeding patterns of King Penguins on the Falkland Islands." Emu 107(2): 156-164.	2007	Falkland Islands	NA	NA	NA	NA	NA	NA	South Atlantic	Biology	Seabirds	Breeding patterns of King penguins
Neusser, T. P., et al. (2007). "Sperm ultrastructure of Microhedyle remanei, an interstitial acochlidian gastropod with dermal fertilization." Journal of the Marine Biological Association of the United Kingdom 87(3): 747-754.	2007	Bermuda	NA	NA	NA	NA	NA	NA	North-western Atlantic	Biology	Mollusca	Ultrastructure of sperm of an acochlidian opisthobranch in Microhedyle remanei
Murphy, E. J., et al. (2007). "Climatically driven fluctuations in Southern Ocean ecosystems." Proceedings of the Royal Society B-Biological Sciences 274(1629): 3057-3067.	2007	SGSSI	NA	NA	NA	NA	NA	NA	Southern Ocean	Ecology	Comprehensive	Role of physical and biological processes in generating fluctuations in the ecosystem around South Georgia in the South Atlantic sector of the Southern Ocean.
Murdoch, T. J. T., et al. (2007). "Large-scale decline in offshore seagrass meadows in Bermuda." Marine Ecology Progress Series 339: 123-130.	2007	Bermuda	NA	NA	NA	NA	NA	NA	North-western Atlantic	Distribution	Macroalgae	Fine-scale computerized mapping and subsequent broad-scaled field assessment of seagrass meadows in Bermuda
McGowan, A., et al. (2007). "A rigorous assessment of the avifauna of a small Caribbean Island: A case study in Anegada, British Virgin Islands." Caribbean Journal of Science 43(1): 99-116.	2007	BVI	NA	NA	NA	NA	NA	NA	Caribbean	Biology	Seabirds	Survey of all birds of Anegada
Mangubhai, S., et al. (2007). "Synchronous daytime spawning of the solitary coral Fungia danai (Fungiidae) in the Chagos Archipelago, central Indian Ocean." Coral Reefs 26(1): 15-15.	2007	BIOT	NA	NA	NA	NA	NA	NA	Caribbean	Biology	Anthozoa	Synchronous daytime spawning of the solitary coral Fungia danai reported
MacLeod, C. D. and E. Bennett (2007). "Pan-tropical spotted dolphins (Stenella attenuata) and other cetaceans around St Helena in the tropical south-eastern Atlantic." Journal of the Marine Biological Association of the United Kingdom 87(1): 339-344.	2007	St Helena	NA	NA	NA	NA	NA	NA	South Atlantic	Biology	Mammalia	Short term preliminary study of cetacean community around St Helena
Lee, P. L. M., et al. (2007). "Detecting female precise natal philopatry in green turtles using assignment methods." Molecular Ecology 16(1): 61-74.	2007	Ascension	NA	NA	NA	NA	NA	NA	South Atlantic	Biology	Chelonioidea	Natal philopatry using genetic data of green turtles from three nesting sites in the Ascension Island rookery
Laptikhovsky, V. V., et al. (2007). "Reproductive biology in two species of deep-sea squids." Marine Biology 152(4): 981-990.	2007	Falkland Islands	NA	NA	NA	NA	NA	NA	South Atlantic	Biology	Cephalopoda	Reproductive biology of two deep-sea squids, Moroteuthis ingens and Gonatus antarcticus
Laich, A. G. and M. Favero (2007). "Spatio-temporal variation in mortality rates of White-chinned Petrels Procellaria aequinoctialis interacting with longliners in the south-west Atlantic." Bird Conservation International 17(4): 359-366.	2007	Falkland Islands	NA	NA	NA	NA	NA	NA	South Atlantic	Threat	Seabirds	Capture rate of white chinned petrels by Argentinean longliners
Koenemann, S., et al. (2007). "Micropacteridae, a new family of Remipedia (Crustacea) from the Turks and Caicos Islands." Organisms Diversity and Evolution 7(1): 52.e51-52.e14.	2007	TCI	NA	NA	NA	NA	NA	NA	South Atlantic	Taxonomy	Crustacea	New species of Remipedia. Micropacter yagerae
Klatsky, L. J., et al. (2007). "Offshore bottlenose dolphins (Tursiops truncatus): Movement and dive behavior near the Bermuda Pedestal." Journal of Mammalogy 88(1): 59-66.	2007	Bermuda	NA	NA	NA	NA	NA	NA	North-western Atlantic	Distribution	Mammalia	Behavior of offshore bottlenose dolphins (Tursiops truncatus)
Kahru, M., et al. (2007). "Eddies enhance biological production in the Weddell-Scotia confluence of the southern ocean." Geophysical Research Letters 34(14).	2007	BAT	SGSSI	NA	NA	NA	NA	NA	Southern Ocean	Ecology	Plankton	Influence of cross frontal eddy activity in the Southern Antarctic Circumpolar Current Front on spring phytoplankton growth
Jones, R. J. (2007). "Chemical contamination of a coral reef by the grounding of a cruise ship in Bermuda." Marine Pollution Bulletin 54(7): 905-911.	2007	Bermuda	NA	NA	NA	NA	NA	NA	North-western Atlantic	Threat	Anthozoa	Level of contamination in coral on a grounding site
Jiang, S. N., et al. (2007). "Temporal variability of zooplankton biomass from ADCP backscatter time series data at the Bermuda Testbed Mooring site." Deep-Sea Research Part I-Oceanographic Research Papers 54(4): 608-636.	2007	Bermuda	NA	NA	NA	NA	NA	NA	North-western Atlantic	Ecology	Plankton	Temporal variability of acoustically estimated zooplankton biomass
Hewson, I., et al. (2007). "Characteristics of diazotrophs in surface to abyssopelagic waters of the Sargasso Sea." Aquatic Microbial Ecology 46(1): 15-30.	2007	Bermuda	NA	NA	NA	NA	NA	NA	North-western Atlantic	Ecology	Microbial community	Ecology of planktonic diazotrophs
Hall, G. B. and C. H. Close (2007). "Local knowledge assessment for a small-scale fishery using geographic information systems." Fisheries Research 83(1): 11-22.	2007	TCI	NA	NA	NA	NA	NA	NA	South Atlantic	Management	NA	Collection of local knowledge of harvesters within a small-scale fishery and applies it to the spiny lobster and queen conch fisheries
Guitart, C., et al. (2007). "Negligible risks to corals from antifouling booster biocides and triazine herbicides in coastal waters of the Chagos Archipelago." Marine Pollution Bulletin 54(2): 226-232.	2007	BIOT	NA	NA	NA	NA	NA	NA	Indian Ocean	Threat	NA	Investigated the presence of selected booster biocides associated with vessels visiting/anchoring within the Diego Garcia harbours to assess potential risks to corals.
Graham, N. A. J. (2007). "Ecological versatility and the decline of coral feeding fishes following climate driven coral mortality." Marine Biology 153(2): 119-127.	2007	BIOT	NA	NA	NA	NA	NA	NA	Indian Ocean	Ecology	Fish	Assess feeding specialisation in three species of coral feeding butterflyfish
Gonzalez-Solis, J., et al. (2007). "Offshore spatial segregation in giant petrels Macronectes spp.: differences between species, sexes and seasons." Aquatic Conservation-Marine and Freshwater Ecosystems 17: S22-S36.	2007	SGSSI	NA	NA	NA	NA	NA	NA	Southern Ocean	Ecology	Seabirds	Foraging strategies of northern giant petrels (Macronectes halli) and southern giant petrels (M. giganteus) breeding at South Georgia
Goebel, M. E., et al. (2007). "Using carapace measurements to determine the sex of Antarctic krill, Euphausia superba." Polar Biology 30(3): 307-315.	2007	BAT	NA	NA	NA	NA	NA	NA	Southern Ocean	Biology	Plankton	Examining whether carapace measurements can be used to determine sex of Antarctic krill
Galimberti, F., et al. (2007). "The cost of success: Reproductive effort in male southern elephant seals (Mirounga leonina)." Behavioral Ecology and Sociobiology 62(2): 159-171.	2007	Falkland Islands	NA	NA	NA	NA	NA	NA	South Atlantic	Biology	Mammalia	Reproductive effort of male elephant seals
Fosshagen, A. and T. M. Iliffe (2007). "New species of epacteriscids (Copepoda, Calanoida) from anchialine caves in the Caicos Islands and the Bahamas." Marine Biology Research 3(2): 73-92.	2007	TCI	NA	NA	NA	NA	NA	NA	Caribbean	Taxonomy	Crustacea	Description of new genus/species of epacteriscids in Caicos Islands
Esteban, G. F., et al. (2007). "Siliceous scales of filose-amoebae (Pompholyxophryidae, Rotosphaerida) from deep Southern Ocean sediments, including first records for the Southern Hemisphere." Polar Biology 30(7): 945-950.	2007	SGSSI	BAT	NA	NA	NA	NA	NA	Southern Ocean	Distribution	Microbial community	Distribution of protists
Eastman, J. T. and M. J. Lannoo (2007). "Brain and sense organ anatomy and histology of two species of phyletically basal non-antarctic thornfishes of the Antarctic suborder notothenioidei (Perciformes : Bovichtidae)." Journal of Morphology 268(6): 485-503.	2007	Tristan	Falkland Islands	NA	NA	NA	NA	NA	South Atlantic	Biology	Fish	Brain/sense organ anatomy of South Atlantic bovichtids Bovichtus diacanthus, the klipfish from tide pools at Tristan da Cunha, and Cottoperca gobio, the frogmouth from the Patagonian shelf and Falkland Islands
De Grave, S. (2007). "On the occurrence of Gnathophylleptum tellei d'Udekem d'Acoz, 2001 (Decapoda, Gnathophyllidae) in St Helena, South Atlantic Ocean." Crustaceana 80(7): 893-895.	2007	St Helena	NA	NA	NA	NA	NA	NA	South Atlantic	Distribution	Crustacea	Report of Gnathophylleptum tellei from St Helena found in historical archive
Corlett, H. and B. Jones (2007). "Epiphyte communities on Thalassia testudinum from Grand Cayman, British West Indies: Their composition, structure, and contribution to lagoonal sediments." Sedimentary Geology 194(3-4): 245-262.	2007	Cayman Islands	NA	NA	NA	NA	NA	NA	Caribbean	Ecology	Comprehensive	Epiphyte community on Thalassia testudinum
Collins, M. A., et al. (2007). "Distribution and diet of juvenile patagonian toothfish on the south Georgia and shag rocks shelves (Southern ocean)." Marine Biology 152(1): 135-147.	2007	SGSSI	NA	NA	NA	NA	NA	NA	Southern Ocean	Ecology	Fish	Distribution and diet of juvenile Patagonian toothfish
Coelho, V. R. and C. Manfrino (2007). "Coral community decline at a remote Caribbean island: marine no-take reserves are not enough." Aquatic Conservation-Marine and Freshwater Ecosystems 17(7): 666-685.	2007	Cayman Islands	NA	NA	NA	NA	NA	NA	Caribbean	Ecology	Anthozoa	Coral communities around the island from 1999 to 2004
Campagna, C., et al. (2007). "A species approach to marine ecosystem conservation." Aquatic Conservation-Marine and Freshwater Ecosystems 17: S122-S147.	2007	Falkland Islands	NA	NA	NA	NA	NA	NA	South Atlantic	Management	NA	Uses existing data to consider efficient spatial planning through a focal species approach in an ecosystem framwork
Brickle, P. and K. MacKenzie (2007). "Parasites as biological tags for Eleginops maclovinus (Teleostei : Eleginopidae) around the Falkland Islands." Journal of Helminthology 81(2): 147-153.	2007	Falkland Islands	NA	NA	NA	NA	NA	NA	South Atlantic	Ecology	Fish, other	Parasite fauna of Eleginops maclovinus
Brandt, A., et al. (2007). "Deep-sea isopod biodiversity, abundance, and endemism in the Atlantic sector of the Southern Ocean-Results from the ANDEEP I-III expeditions." Deep-Sea Research Part Ii-Topical Studies in Oceanography 54(16-17): 1760-1775.	2007	BAT	SGSSI	NA	NA	NA	NA	NA	Southern Ocean	Biodiversity stocktake	Crustacea	Isopod biodiversity
Branch, T. A., et al. (2007). "Separating southern blue whale subspecies based on length frequencies of sexually mature females." Marine Mammal Science 23(4): 803-833.	2007	BAT	SGSSI	NA	NA	NA	NA	NA	Southern Ocean	Biology	Mammalia	Estimated the proportions of two subspecies of blue whale in various regions from catch data
Bell, C. D., et al. (2007). "Monitoring and conservation of critically reduced marine turtle nesting populations: lessons from the Cayman Islands." Animal Conservation 10(1): 39-47.	2007	Cayman Islands	NA	NA	NA	NA	NA	NA	Caribbean	Management	Chelonioidea	Monitoring of nesting marine turtles
Ashford, J. R., et al. (2007). "Otolith chemistry reflects frontal systems in the Antarctic Circumpolar Current." Marine Ecology Progress Series 351: 249-260.	2007	Falkland Islands	SGSSI	NA	NA	NA	NA	NA	Southern Ocean, South Atlantic	Biology	Fish	Link otolith chemistry of Patagonian toothfish Dissostichus eleginoides with frontal systems
Ashford, J. and C. Jones (2007). "Oxygen and carbon stable isotopes in otoliths record spatial isolation of Patagonian toothfish (Dissostichus eleginoides)." Geochimica Et Cosmochimica Acta 71(1): 87-94.	2007	SGSSI	NA	NA	NA	NA	NA	NA	Southern Ocean	Biology	Fish	Oxygen and carbon stable isotopes in otoliths of Patagonian toothfish (Dissostichus eleginoides)
Anker, A. (2007). "Alpheus zimmermani sp. nov., a new colourful snapping shrimp (Crustacea: Decapoda) from the Caribbean Sea." Cahiers De Biologie Marine 48(3): 241-247.	2007	BVI	NA	NA	NA	NA	NA	NA	Caribbean	Taxonomy	Crustacea	New species of snapping shrimp described
Wiedenmann, J., et al. (2008). "Temperature-dependent growth of Antarctic krill: predictions for a changing climate from a cohort model." Marine Ecology Progress Series 358: 191-202.	2008	SGSSI	BAT	NA	NA	NA	NA	NA	Southern Ocean	Biology	Plankton	Temperature dependent growth model of Antarctic krill
Whitehouse, M. J., et al. (2008). "Rapid warming of the ocean around South Georgia, Southern Ocean, during the 20th century: Forcings, characteristics and implications for lower trophic levels." Deep-Sea Research Part I-Oceanographic Research Papers 55(10): 1218-1228.	2008	SGSSI	NA	NA	NA	NA	NA	NA	Southern Ocean	Biology	Plankton	Warming around South Georgia and implications for krill Euphausia superba
Whitehouse, M. J., et al. (2008). "Formation, transport and decay of an intense phytoplankton bloom within the High-Nutrient Low-Chlorophyll belt of the Southern Ocean." Journal of Marine Systems 70(1-2): 150-167.	2008	SGSSI	NA	NA	NA	NA	NA	NA	Southern Ocean	Biogeochemistry	Plankton	Description of phytoplankton blooms around South Georgia
Ward, P., et al. (2008). "The summertime plankton community at South Georgia (Southern Ocean): Comparing the historical (1926/1927) and modern (post 1995) records." Progress in Oceanography 78(3): 241-256.	2008	SGSSI	NA	NA	NA	NA	NA	NA	Southern Ocean	Ecology	Plankton	Interannual variability in phytoplankton
Waller, C. L. (2008). "Variability in intertidal communities along a latitudinal gradient in the Southern Ocean." Polar Biology 31(7): 809-816.	2008	SGSSI	BAT	Falkland Islands	NA	NA	NA	NA	Southern Ocean	Ecology	Comprehensive	Intertidal communities in Southern Ocean
Venn, A. A., et al. (2008). "Importance of time and place: Patterns in abundance of Symbiodinium clades A and B in the tropical sea anemone Condylactis gigantea." Biological Bulletin 215(3): 243-252.	2008	Bermuda	NA	NA	NA	NA	NA	NA	North-western Atlantic	Ecology	Anthozoa	Explored the impact of natural variation in temperature on a sea anenome symbiosis with a mixed infection of Symbiodinium
Trathan, P. N., et al. (2008). "Linear tracks and restricted temperature ranges characterise penguin foraging pathways." Marine Ecology Progress Series 370: 285-294.	2008	SGSSI	NA	NA	NA	NA	NA	NA	Southern Ocean	Distribution	Seabirds	At-sea behaviour of king penguins breeding on South Georgia
Tarling, G. A. and J. Cuzin-Roudy (2008). "External parasite infestation depends on moult-frequency and age in Antarctic krill (Euphausia superba)." Polar Biology 31(2): 121-130.	2008	SGSSI	NA	NA	NA	NA	NA	NA	Southern Ocean	Biology	Plankton	Levels of infestation by the suctorian Ephelota sp. in Antarctic krill
Strugnell, J. M., et al. (2008). "Molecular evolutionary relationships of the octopodid genus Thaumeledone (Cephalopoda : Octopodidae) from the Southern Ocean." Antarctic Science 20(3): 245-251.	2008	SGSSI	BAT	NA	NA	NA	NA	NA	Southern Ocean	Biology	Cephalopoda	Resolve the phylogenetic relationships within Southern Ocean Thaumeledone species
Sheppard, C. R. C., et al. (2008). "Archipelago-wide coral recovery patterns since 1998 in the Chagos Archipelago, central Indian Ocean." Marine Ecology Progress Series 362: 109-117.	2008	BIOT	NA	NA	NA	NA	NA	NA	Indian Ocean	Ecology	Anthozoa	Coral recovery following bleaching
Semeniuk, C. A. D. and K. D. Rothley (2008). "Costs of group-living for a normally solitary forager: Effects of provisioning tourism on southern stingrays Dasyatis americana." Marine Ecology Progress Series 357: 271-282.	2008	Cayman Islands	NA	NA	NA	NA	NA	NA	Caribbean	Management	Fish	Effect of tourism provisioning on the southern stingray Dasyatis americana
Schwabe, E. (2008). "Discovery of the South African polyplacophoran Stenosemus simplicissimus (Thiele, 1906) (Mollusca, Polyplacophora, Ischnochitonidae) in the Southern Ocean." American Malacological Bulletin 24(1-2): 71-77.	2008	SGSSI	BATS	NA	NA	NA	NA	NA	Southern Ocean	Taxonomy	Mollusca	Redescription of Stenosemus simplicissimus and expansion of range
Schneider, C. W. and M. J. Wynne (2008). "Notes on the Marine Algae of the Bermudas. 10. Woelkerlingia sterreri sp nov (Rhodophyta, Wrangeliaceae), a First Record of the Genus in the Western Atlantic." Caribbean Journal of Science 44(3): 303-310.	2008	Bermuda	NA	NA	NA	NA	NA	NA	North-western Atlantic	Taxonomy	Macroalgae	Description of new species of marine algae
Salihoglu, B., et al. (2008). "Influence of nutrient utilization and remineralization stoichiometry on phytoplankton species and carbon export: A modeling study at BATS." Deep-Sea Research Part I-Oceanographic Research Papers 55(1): 73-107.	2008	Bermuda	NA	NA	NA	NA	NA	NA	North-western Atlantic	Biogeochemistry	Plankton	Model developed to understand the underlying mechanisms (algal) of the time-varying flux of carbon in the Sargasso Sea
Ryan, P. G. (2008). "Seabirds indicate changes in the composition of plastic litter in the Atlantic and south-western Indian Oceans." Marine Pollution Bulletin 56(8): 1406-1409.	2008	Tristan	NA	NA	NA	NA	NA	NA	South Atlantic	Threat	Seabirds	Compare plastic ingested by five species of seabirds sampled in the 1980s and again in 1999–2006
Rodriguez, F., et al. (2008). "Phylogenetic and morphological characterisation of the green algae infesting blue mussel Mytilus edulis in the North and South Atlantic oceans." Diseases of Aquatic Organisms 81(3): 231-240.	2008	Falkland Islands	NA	NA	NA	NA	NA	NA	South Atlantic	Biology	Mollusca, Macroalgae	Phylogenetic relationship of blue mussels with their marine counterpart, C. parasitica
Ribic, C. A., et al. (2008). "Top predators in relation to bathymetry, ice and krill during austral winter in Marguerite Bay, Antarctica." Deep-Sea Research Part Ii-Topical Studies in Oceanography 55(3-4): 485-499.	2008	BAT	NA	NA	NA	NA	NA	NA	Southern Ocean	Ecology	Seabirds, mammalia	Assessed the distribution of the resident pack-ice top predators in relation to those deep across-shelf troughs and investigated associations between top predators and their prey.
Reynolds, S. J., et al. (2008). "Sexing sooty terns on Ascension Island from morphometric measurements." Journal of Zoology 274(1): 2-8.	2008	Ascension	NA	NA	NA	NA	NA	NA	South Atlantic	Biology	Seabirds	Assessed morphometric approaches to sexing Sooty terns
Reid, T. A. and N. Huin (2008). "Census of the Southern Giant Petrel population of the Falkland Islands 2004/2005." Bird Conservation International 18(2): 118-128.	2008	Falkland Islands	NA	NA	NA	NA	NA	NA	South Atlantic	Biology	Seabirds	Census of Southern Giant Petrels
Ratcliffe, N., et al. (2008). "Resolving the population status of Ascension Frigatebird Fregata aquila using a 'virtual ecologist' model." Ibis 150(2): 300-306.	2008	Ascension	NA	NA	NA	NA	NA	NA	South Atlantic	Biology	Seabirds	Census of Ascension Frigatebird
Quillfeldt, P., et al. (2008). "Introduced mammals coexist with seabirds at New Island, Falkland Islands: abundance, habitat preferences, and stable isotope analysis of diet." Polar Biology 31(3): 333-349.	2008	Falkland Islands	NA	NA	NA	NA	NA	NA	South Atlantic	Management	NA	Diet of invasive mammalian predators and level of predation on seabirds
Quillfeldt, P., et al. (2008). "Stable isotope analysis reveals sexual and environmental variability and individual consistency in foraging of thin-billed prions." Marine Ecology Progress Series 373: 137-148.	2008	Falkland Islands	NA	NA	NA	NA	NA	NA	South Atlantic	Ecology	Seabirds	Updated review of isotope studies in the Southern Ocean and used δ13C and δ15N to evaluate diet and foraging areas of the thin-billed prion Pachyptila belcheri
Purkis, S. J., et al. (2008). "Predictability of reef fish diversity and abundance using remote sensing data in Diego Garcia (Chagos Archipelago)." Coral Reefs 27(1): 167-178.	2008	BIOT	NA	NA	NA	NA	NA	NA	Indian Ocean	Ecology	Fish	Using remote sensing to predict diversity and abundance of reef fish
Poisbleau, M., et al. (2008). "Aspects of the breeding biology of the southern rockhopper penguin Eudyptes c. chrysocome and new consideration on the intrinsic capacity of the A-egg." Polar Biology 31(8): 925-932.	2008	Falkland Islands	NA	NA	NA	NA	NA	NA	South Atlantic	Biology	Seabirds	Breeding biology of the southern rockhopper on New Island
Pearce, D. A. (2008). "Biodiversity of the bacterioplankton in the surface waters around Southern Thule in the Southern Ocean." Antarctic Science 20(3): 291-300.	2008	SGSSI	NA	NA	NA	NA	NA	NA	Southern Ocean	Ecology	Microbial community	Biodiversity of the bacterioplankton in the surface waters around Southern Thule, South Sandwich Islands
Pakes, M. J. and R. M. Woollacott (2008). "Reproduction of the gorgonian Plexaura flexuosa in Bermuda." Journal of Experimental Marine Biology and Ecology 357(2): 121-127.	2008	Bermuda	NA	NA	NA	NA	NA	NA	North-western Atlantic	Biology	Anthozoa	Geographically based differences in reproductive biology of Plexaura flexuosa
Miwa, S., et al. (2008). "Histopathology of Antarctic krill, Euphausia superba, bearing black spots." Journal of Invertebrate Pathology 98(3): 280-286.	2008	SGSSI	NA	NA	NA	NA	NA	NA	Southern Ocean	Biology	Plankton	Study of black spots on Antarctic krill
McGowan, A., et al. (2008). "Seabird populations of the Chagos Archipelago, Indian Ocean: an evaluation of IBA sites." Oryx 42(3): 424-429.	2008	BIOT	NA	NA	NA	NA	NA	NA	Indian Ocean	Management	Seabirds	Rapid assessment of breeding seabirds
McGowan, A., et al. (2008). "Down but not out: marine turtles of the British Virgin Islands." Animal Conservation 11(2): 92-103.	2008	BVI	NA	NA	NA	NA	NA	NA	Caribbean	Biology	Chelonioidea	Multi-annual assessment of the spatio-temporal patterns of marine turtle nesting, and foraging
Matias, R. and P. Catry (2008). "The diet of feral cats at New Island, Falkland Islands, and impact on breeding seabirds." Polar Biology 31(5): 609-616.	2008	Falkland Islands	NA	NA	NA	NA	NA	NA	South Atlantic	Management	NA	Diet of invasive cats and impact on seabirds
Lockhart, S. J. and C. D. Jones (2008). "Biogeographic patterns of benthic invertebrate megafauna on shelf areas within the southern ocean Atlantic sector." Ccamlr Science 15: 167-192.	2008	BAT	SGSSI	NA	NA	NA	NA	NA	Southern Ocean	Biogeography	Comprehensive	Distribution patterns of benthic invertebrate megafaunal assemblages of shelf habitats
Kornicker, L. S., et al. (2008). "Ontogeny of Deeveya spiralis Kornicker and Iliffe, 1985, collected in anchialine caves in the Caicos Islands (Crustacea, Ostracoda, Halocyprida, Deeveyidae)." Proceedings of the Biological Society of Washington 121(3): 331-353.	2008	TCI	NA	NA	NA	NA	NA	NA	Caribbean	Biology	Crustacea	Ontogeny of Deeveya spiralis
Korb, R. E., et al. (2008). "Magnitude and maintenance of the phytoplankton bloom at South Georgia: a naturally iron-replete environment." Marine Ecology Progress Series 368: 75-91.	2008	SGSSI	NA	NA	NA	NA	NA	NA	Southern Ocean	Ecology	Plankton	Phytoplankton blooms around South Georgia
Kobara, S. and W. D. Heyman (2008). "Geomorphometric patterns of Nassau grouper (Epinephelus striatus) spawning aggregation sites in the Cayman Islands." Marine Geodesy 31(4): 231-245.	2008	Cayman Islands	NA	NA	NA	NA	NA	NA	Caribbean	Ecology	Fish	Geospatial aspects of known Nassau grouper spawning aggregation sites in the Cayman Islands
Kaiser, S., et al. (2008). "Epibenthic macrofauna associated with the shelf and slope of a young and isolated Southern Ocean island." Antarctic Science 20(3): 281-290.	2008	SGSSI	NA	NA	NA	NA	NA	NA	Southern Ocean	Ecology	Comprehensive	Quantified the richness and abundance of the epibenthic macrofauna around the Southern Thule group along a depth transect
Huijbers, C. M., et al. (2008). "Shallow patch reefs as alternative habitats for early juveniles of some mangrove/seagrass-associated fish species in Bermuda." Revista De Biologia Tropical 56: 161-169.	2008	Bermuda	NA	NA	NA	NA	NA	NA	North-western Atlantic	Ecology	Fish	Investigated whether some nursery species can utilise alternative juvenile habitats when mangroves and seagrass habitats are not readily available
Hughes, B. J., et al. (2008). "Cats and seabirds: effects of feral Domestic Cat Felis silvestris catus eradication on the population of Sooty Terns Onychoprion fuscata on Ascension Island, South Atlantic." Ibis 150: 122-131.	2008	Ascension	NA	NA	NA	NA	NA	NA	South Atlantic	Threat	Seabirds	Effect of cat eradication on sooty terns
Guynn, K. D. and M. S. Peterson (2008). "Mercury concentrations in the Patagonian toothfish, Dissostichus eleginoides Smitt 1898, among three distinct stocks." Polar Biology 31(3): 269-274.	2008	SGSSI	NA	NA	NA	NA	NA	NA	Southern Ocean	Ecotoxicology	Fish	Geographical variation of mercury concentrations in the Patagonian toothfish, Dissostichus eleginoides
Griffiths, H. J., et al. (2008). "Distribution of macrobenthic taxa across the Scotia Arc, Southern Ocean." Antarctic Science 20(3): 213-226.	2008	BAT	SGSSI	Falkland Islands	NA	NA	NA	NA	Southern Ocean, South Atlantic	Ecology	Comprehensive	Distribution of macrobenthic taxa
Goulet, T. L., et al. (2008). "Worldwide biogeography of Symbiodinium in tropical octocorals." Marine Ecology Progress Series 355: 45-58.	2008	Bermuda	NA	NA	NA	NA	NA	NA	North-western Atlantic	Biogeography	Other, Anthozoa	Genetic diversity of symbiotic zooxanthellae (Symbiodinium spp.) in octocorals in Bermuda compared with 14 other locations
Goreau, T. J., et al. (2008). "Turks and Caicos Islands 2006 coral reef assessment: Large-scale environmental and ecological interactions and their management implications." Revista De Biologia Tropical 56: 25-49.	2008	TCI	NA	NA	NA	NA	NA	NA	Caribbean	Ecology	Anthozoa, macroalgae	Rapid assessment of reefs around TCI
Goldthwait, S. A. and D. K. Steinberg (2008). "Elevated biomass of mesozooplankton and enhanced fecal pellet flux in cyclonic and mode-water eddies in the Sargasso Sea." Deep-Sea Research Part II: Topical Studies in Oceanography 55(10-13): 1360-1377.	2008	Bermuda	NA	NA	NA	NA	NA	NA	North-western Atlantic	Biogeochemistry	Plankton	Biomass of mesozooplankton and fecal pellet flux in cyclonic and mode-water eddies
Ewart, C. S., et al. (2008). "Microbial dynamics in cyclonic and anticyclonic mode-water eddies in the northwestern Sargasso Sea." Deep-Sea Research Part II: Topical Studies in Oceanography 55(10-13): 1334-1347.	2008	Bermuda	NA	NA	NA	NA	NA	NA	North-western Atlantic	Biogeochemistry	Microbial community	Evaluated the response of the microbial community and further understand the biological and biogeochemical consequences of mesoscale perturbation events
Ebert, T. A., et al. (2008). "Growth, survival, and longevity estimates for the rock-boring sea urchin Echinometra lucunter lucunter (Echinodermata, Echinoidea) in Bermuda." Bulletin of Marine Science 82(3): 381-403.	2008	Bermuda	NA	NA	NA	NA	NA	NA	North-western Atlantic	Biology	Echinodermata	Growth, survival, and longevity of the sea urchin Echinometra lucunter lucunter
Doolittle, D. F., et al. (2008). "Wintertime abundance of picoplankton in the Atlantic sector of the Southern Ocean." Nova Hedwigia: 147-160.	2008	Tristan	NA	NA	NA	NA	NA	NA	South Atlantic	Biology	Plankton	Wintertime abundance of picoplankton
Cresswell, K. A., et al. (2008). "Can macaroni penguins keep up with climate- and fishing-induced changes in krill?" Polar Biology 31(5): 641-649.	2008	SGSSI	NA	NA	NA	NA	NA	NA	Southern Ocean	Ecology	Seabirds, plankton	Response of macaroni penguins to climate/fishing induced changes in krill
Craig, M. T. (2008). "The goldrim surgeonfish (Acanthurus nigricans; Acanthuridae) from Diego Garcia, Chagos Archipelago: First record for the central Indian Ocean." Zootaxa(1850): 65-68.	2008	BIOT	NA	NA	NA	NA	NA	NA	Indian Ocean	Distribution	Fish	First record of goldrim surgeonfish (Acanthurus nigricans)
Collins, M. A., et al. (2008). "Patterns in the distribution of myctophid fish in the northern Scotia Sea ecosystem." Polar Biology 31(7): 837-851.	2008	SGSSI	NA	NA	NA	NA	NA	NA	Southern Ocean	Ecology	Fish	Investigation of mesopelagic fish community
Collins, M. A., et al. (2008). "Distribution, growth, diet and foraging behaviour of the yellow-fin notothen Patagonotothen guntheri (Norman) on the Shag Rocks shelf (Southern Ocean)." Journal of Fish Biology 72(1): 271-286.	2008	SGSSI	NA	NA	NA	NA	NA	NA	Southern Ocean	Biology	Fish	Distribution, growth, diet and foraging behaviour of the yellow-fin notothen Patagonotothen guntheri
Clarke, S., et al. (2008). "Biology and distribution of South Georgia icefish (Pseudochaenichthys georgianus) around South Georgia and Shag Rocks." Antarctic Science 20(4): 343-353.	2008	SGSSI	NA	NA	NA	NA	NA	NA	Southern Ocean	Biology	Fish	Biology and distribution of South Georgia icefish (Pseudochaenichthys georgianus)
Bibby, T. S., et al. (2008). "Photosynthetic community responses to upwelling in mesoscale eddies in the subtropical North Atlantic and Pacific Oceans." Deep-Sea Research Part Ii-Topical Studies in Oceanography 55(10-13): 1310-1320.	2008	Bermuda	NA	NA	NA	NA	NA	NA	North-western Atlantic	Biology	Plankton	Photo-physiological responses of phytoplankton to upwelling of macronutrients in mesoscale eddies
Bell, C. D., et al. (2008). "Harnessing recreational divers for the collection of sea turtle data around the Cayman Islands." Tourism in Marine Environments 5(4): 245-257.	2008	Cayman Islands	NA	NA	NA	NA	NA	NA	Caribbean	Distribution	Chelonioidea	Recreational diver sightings used as proxy for spatiotemporal patterns in abundance
Belchier, M. and M. A. Collins (2008). "Recruitment and body size in relation to temperature in juvenile Patagonian toothfish (Dissostichus eleginoides) at South Georgia." Marine Biology 155(5): 493-503.	2008	SGSSI	NA	NA	NA	NA	NA	NA	Southern Ocean	Biology	Fish	Recruitment and body size in relation to temperature in juvenile Patagonian toothfish (Dissostichus eleginoides)
Barratt, I. M., et al. (2008). "Female reproductive biology of two sympatric incirrate octopod species, Adelieledone polymorpha (Robson 1930) and Pareledone turqueti (Joubin 1905) (Cephalopoda : Octopodidae), from South Georgia." Polar Biology 31(5): 583-594.	2008	SGSSI	NA	NA	NA	NA	NA	NA	Southern Ocean	Biology	Cephalopoda	Reproductive biology of two species of endemic Southern Ocean octopods
Barnes, D. K. A. (2008). "A benthic richness hotspot in the Southern Ocean: Slope and shelf cryptic benthos of Shag Rocks." Antarctic Science 20(3): 263-270.	2008	SGSSI	NA	NA	NA	NA	NA	NA	Southern Ocean	Ecology	Comprehensive	Shelf and slope cryptofauna
Arkhipkin, A. I., et al. (2008). "Biology of the skates Bathyraja brachyurops and B. griseocauda in waters around the Falkland Islands, Southwest Atlantic." Ices Journal of Marine Science 65(4): 560-570.	2008	Falkland Islands	NA	NA	NA	NA	NA	NA	South Atlantic	Biology	Fish	Distributions and length compositions of two large, abundant skates, broadnose skate Bathyraja brachyurops and grey-tail skate B. griseocauda
Whitehouse, M. J., et al. (2009). "Role of krill versus bottom-up factors in controlling phytoplankton biomass in the northern Antarctic waters of South Georgia." Marine Ecology Progress Series 393: 69-82.	2009	SGSSI	NA	NA	NA	NA	NA	NA	Southern Ocean	Ecology	Plankton	Explores the extent to which Antarctic phytoplankton stocks are controlled by ‘bottom-up’ and/or ‘top-down’ factors
Wanless, R. M., et al. (2009). "From both sides: Dire demographic consequences of carnivorous mice and longlining for the Critically Endangered Tristan albatrosses on Gough Island." Biological Conservation 142(8): 1710-1718.	2009	Tristan	NA	NA	NA	NA	NA	NA	South Atlantic	Management	Seabirds	Population trends of Tristan Albatross and reasons for decline
Waluda, C. M., et al. (2009). "Linking predator and prey behaviour: Contrasts between Antarctic fur seals and macaroni penguins at South Georgia." Marine Biology 157(1): 99-112.	2009	SGSSI	NA	NA	NA	NA	NA	NA	Southern Ocean	Ecology	Seabirds, mammalia	Variability in the foraging ecology of Antarctic fur seals and macaroni penguins
Wakefield, E. D., et al. (2009). "Wind field and sex constrain the flight speeds of central-place foraging albatrosses." Ecological Monographs 79(4): 663-679.	2009	SGSSI	NA	NA	NA	NA	NA	NA	Southern Ocean	Biology	Seabirds	Quantified the effects of relative wind speed, sex, breeding stage, and trip stage on the ground speeds Wandering Albatrosses Diomedea exulans, Black-browed Albatrosses Thalassarche melanophrys, Lightmantled Sooty Albatrosses Phoebatria palpebrata, and Gray-headed Albatrosses T. chrysostoma.
Venn, A. A., et al. (2009). "Deep zooxanthellate corals at the high latitude Bermuda Seamount." Coral Reefs 28(1): 135.	2009	Bermuda	NA	NA	NA	NA	NA	NA	North-western Atlantic	Biology	Anthozoa	Structure of the deep forereef and analysis of genetic diversity of zooxanthellae from deep corals
Trathan, P. N. and K. Reid (2009). "Exploitation of the marine ecosystem in the sub-Antarctic: Historical impacts and current consequences." Papers and Proceedings of the Royal Society of Tasmania 143(1-2): 9-14.	2009	SGSSI	BAT	NA	NA	NA	NA	NA	Southern Ocean	Threat	Comprehensive	Reviewed effects of exploitation through ecosystem model
Thoma, B. P., et al. (2009). "Redescription of pinnixa arenicola rathbun, 1922 (Decapoda: Brachyura: Pinnotheridae), with new observations on its range and host." Proceedings of the Biological Society of Washington 122(1): 72-80.	2009	Cayman Islands	NA	NA	NA	NA	NA	NA	Caribbean	Taxonomy	Crustacea	Pinnixa arenicola is redescribed and illustrated and range extension into Cayman Islands described
Strugnell, J. M., et al. (2009). "Microsatellite loci from the endemic Southern Ocean octopus Adelieledone polymorpha (Robson, 1930)." Molecular Ecology Resources 9(3): 1068-1070.	2009	SGSSI	NA	NA	NA	NA	NA	NA	Southern Ocean	Genetics	Cephalopoda	Pattern of spatial genetic structure in the endemic Southern Ocean octopus Adelieledone polymorpha
Shreeve, R. S., et al. (2009). "Feeding ecology of myctophid fishes in the northern Scotia Sea." Marine Ecology Progress Series 386: 221-236.	2009	SGSSI	NA	NA	NA	NA	NA	NA	Southern Ocean	Ecology	Fish	Feeding ecology of 9 species of myctophid fish
Semeniuk, C. A. D., et al. (2009). "A multi-attribute trade-off approach for advancing the management of marine wildlife tourism: a quantitative assessment of heterogeneous visitor preferences." Aquatic Conservation-Marine and Freshwater Ecosystems 19(2): 194-208.	2009	Cayman Islands	NA	NA	NA	NA	NA	NA	Caribbean	Management	Fish	Tourist preferences for wildlife management at a stingray-feeding attraction in the Cayman Islands
Semeniuk, C. A. D., et al. (2009). "Hematological differences between stingrays at tourist and non-visited sites suggest physiological costs of wildlife tourism." Biological Conservation 142(8): 1818-1829.	2009	Cayman Islands	NA	NA	NA	NA	NA	NA	Caribbean	Management	Fish	Physiological responses of southern stingrays to marine tourism
Schofield, P. J. (2009). "Geographic extent and chronology of the invasion of non-native lionfish (Pterois volitans [Linnaeus 1758] and P. miles [Bennett 1828]) in the Western North Atlantic and Caribbean Sea." Aquatic Invasions 4(3): 473-479.	2009	Bermuda	Cayman Islands	TCI	NA	NA	NA	NA	Caribbean, North-western Atlantic	Threat	Fish	Spread of invasive lionfish through Caribbean
Richardson, P. B., et al. (2009). "Marine Turtles in the Turks and Caicos Islands: Remnant Rookeries, Regionally Significant Foraging Stocks, and a Major Turtle Fishery." Chelonian Conservation and Biology 8(2): 192-207.	2009	TCI	NA	NA	NA	NA	NA	NA	Caribbean	Management	Chelonioidea	Status of marine turtles to inform management
Reynolds, S. J., et al. (2009). "Sub-lingual oral fistulas in Sooty Terns (Onychoprion fuscata)." Journal of Ornithology 150(3): 691-696.	2009	Ascension	NA	NA	NA	NA	NA	NA	South Atlantic	Biology	Seabirds	Oral fistulas in Sooty Tern (Onychoprion fuscata)
Primo, C. and E. Vazquez (2009). "Antarctic ascidians: an isolated and homogeneous fauna." Polar Research 28(3): 403-414.	2009	SGSSI	BAT	NA	NA	NA	NA	NA	Southern Ocean	Biogeography	Plankton	Presence/absence of ascidians from the intertidal zone to a depth of 1000 m used to inform biogeography
Price, A. R. G. and A. Harris (2009). "Decadal changes (1996-2006) in coastal ecosystems of the Chagos archipelago determined from rapid assessment." Aquatic Conservation: Marine and Freshwater Ecosystems 19(6): 637-644.	2009	BIOT	NA	NA	NA	NA	NA	NA	Indian Ocean	Ecology	Comprehensive	Results of rapid assessment surveys of coatal ecosystems
Pintus, K. J., et al. (2009). "Impact of clutch relocation on Green Turtle offspring." Journal of Wildlife Management 73(7): 1151-1157.	2009	Ascension	NA	NA	NA	NA	NA	NA	South Atlantic	Management	Chelonioidea	Impact of clutch relocation on Green Turtle Offspring
Phillips, R. A., et al. (2009). "Stable isotopes reveal individual variation in migration strategies and habitat preferences in a suite of seabirds during the nonbreeding period." Oecologia 160(4): 795-806.	2009	SGSSI	NA	NA	NA	NA	NA	NA	Southern Ocean	Ecology	Seabirds	Correspondence between isotope ratios of feathers and nonbreeding distributions of seven species from South Georgia
Mourino-Carballido, B. (2009). "Eddy-driven pulses of respiration in the Sargasso Sea." Deep-Sea Research Part I-Oceanographic Research Papers 56(8): 1242-1250.	2009	Bermuda	NA	NA	NA	NA	NA	NA	North-western Atlantic	Biogeochemistry	Plankton	Plankton community composition and respiration in relation to frontal regions between cyclonic and anticyclonic eddies
Morley, S. A., et al. (2009). "Thermal plasticity of mitochondria: A latitudinal comparison between Southern Ocean molluscs." Comparative Biochemistry and Physiology a-Molecular & Integrative Physiology 152(3): 423-430.	2009	SGSSI	BAT	NA	NA	NA	NA	NA	Southern Ocean	Biology	Mollusca	Thermal acclimation in foot muscle of the limpet, Nacella concinna, and the clam, Laternula elliptica
Morley, S. A., et al. (2009). "Geographical variation in thermal tolerance within Southern Ocean marine ectotherms." Comparative Biochemistry and Physiology a-Molecular & Integrative Physiology 153(2): 154-161.	2009	SGSSI	BAT	NA	NA	NA	NA	NA	Southern Ocean	Threat	Mollusca	Thermal response to two regimes, 0.0, 5.1 to 10.0 °C and 2.5, 7.5 to 12.5 °C, raised at 5.0 °C per week
Molloy, P. P., et al. (2009). "Effects of an artisanal fishery on non-spawning grouper populations." Marine Ecology Progress Series 392: 253-262.	2009	Anguilla	NA	NA	NA	NA	NA	NA	Caribbean	Threat	Fish	Combined information on the spatial intensity of the fishery with underwater surveys of groupers to test for associations between fishing intensity and fish size and density across 19 sites
Main, C. E., et al. (2009). "Identifying patterns in the diet of mackerel icefish (Champsocephalus gunnari) at South Georgia using bootstrapped confidence intervals of a dietary index." Polar Biology 32(4): 569-581.	2009	SGSSI	NA	NA	NA	NA	NA	NA	Southern Ocean	Ecology	Fish	Ontogenetic, inter-annual and regional variations in diet were investigated for mackerel icefish, Champsocephalus gunnari
Lindqvist, C., et al. (2009). "Molecular species identification of historical whale remains from South Georgia." Marine Mammal Science 25(1): 229-238.	2009	SGSSI	NA	NA	NA	NA	NA	NA	Southern Ocean	Genetics	Mammalia	Molecular identification of historical whale remains from South Georgian whaling stations
Lee, J. E. and S. L. Chown (2009). "Temporal development of hull-fouling assemblages associated with an Antarctic supply vessel." Marine Ecology Progress Series 386: 97-105.	2009	Tristan	NA	NA	NA	NA	NA	NA	South Atlantic	Management	Other	Temporal development of fouling communities on an Antarctic supply vessel that serves Tristan amongst other islands
Laptikhovsky, V. and P. Reyes (2009). "Distribution and reproductive biology of a subantarctic deep-sea lobster, the Patagonian lobsterette Thymops birsteini (Zarenkov and Semenov, 1972) (Decapoda, Astacidea, Nephropidae)." Journal of Natural History 43(1-2): 35-46.	2009	Falkland Islands	NA	NA	NA	NA	NA	NA	South Atlantic	Biology	Crustacea	Distribution and reproductive biology of a subantarctic deep-sea lobster, the Patagonian lobsterette
Laptikhovsky, V. (2009). "Oceanographic factors influencing the distribution of South American fur seal, arctocephalus australis around the Falkland Islands before the breeding season." Journal of the Marine Biological Association of the United Kingdom 89(8): 1597-1600.	2009	Falkland Islands	NA	NA	NA	NA	NA	NA	South Atlantic	Distribution	Mammalia	Position and extension of the foraging grounds are caused by oceanographic features determining distribution of prey species.
Kuklinski, P. and D. K. A. Barnes (2009). "A new genus and three new species of Antarctic cheilostome Bryozoa." Polar Biology 32(9): 1251-1259.	2009	SGSSI	NA	NA	NA	NA	NA	NA	Southern Ocean	Taxonomy	Bryozoa	3 new species described
Krumholz, J. and C. Jadot (2009). "Demonstration of a new technology for restoration of red mangrove (Rhizophora mangle) in high-energy environments." Marine Technology Society Journal 43(1): 64-72.	2009	Cayman Islands	NA	NA	NA	NA	NA	NA	Caribbean	Management	Other	Describe new method for red mangrove restoration and results from test study in Grand Cayman
Kelly, A. E., et al. (2009). "Lead concentrations and isotopes in corals and water near Bermuda, 1780-2000." Earth and Planetary Science Letters 283(1-4): 93-100.	2009	Bermuda	NA	NA	NA	NA	NA	NA	North-western Atlantic	Ecotoxicology	Anthozoa	Lead concentrations and isotopes in corals and water
Ju, S. J., et al. (2009). "Comparative lipid dynamics of euphausiids from the Antarctic and Northeast Pacific Oceans." Marine Biology 156(7): 1459-1473.	2009	BAT	NA	NA	NA	NA	NA	NA	Southern Ocean	Biology	Plankton	Lipid classes and individual lipid components of four different species of euphausiids were analyzed in animals from multiple life stages and seasons.
Hartnoll, R. G. (2009). "Sexual maturity and reproductive strategy of the rock crab Grapsus Adsen (Osbeck, 1765) (Brachyura, Grapsidae) on Ascension Island." Crustaceana 82(3): 275-291.	2009	Ascension	NA	NA	NA	NA	NA	NA	South Atlantic	Biology	Crustacea	Reproductive biology of the rock crab Grapsus adscensionis
Harper, E. M., et al. (2009). "Patterns of shell repair in articulate brachiopods indicate size constitutes a refuge from predation." Marine Biology 156(10): 1993-2000.	2009	BAT	Falkland Islands	NA	NA	NA	NA	NA	South Atlantic, Southern Ocean	Biology	Other	Styles of repaired shell damage and size at which injury had been sustained to determine predation survival
Hanson, N. N., et al. (2009). "Intrinsic and extrinsic forcing in life histories: patterns of growth and stable isotopes in male Antarctic fur seal teeth." Marine Ecology Progress Series 388: 263-272.	2009	SGSSI	NA	NA	NA	NA	NA	NA	Southern Ocean	Biology	Mammalia	Patterns of growth and stable isotopes in male Antarctic fur seal teeth
Green, J. A., et al. (2009). "Tracking macaroni penguins during long foraging trips using 'behavioural geolocation'." Polar Biology 32(4): 645-653.	2009	SGSSI	NA	NA	NA	NA	NA	NA	Southern Ocean	Distribution	Seabirds	Trial of new tracking method on macaroni penguins
Graham, N. A. J., et al. (2009). "Coral mortality versus structural collapse as drivers of corallivorous butterflyfish decline." Biodiversity and Conservation 18(12): 3325-3336.	2009	BIOT	NA	NA	NA	NA	NA	NA	Indian Ocean	Threat	Anthozoa, fish	BIOT used as a reference site. Study highlights that butterflyfish are stable in the absence of habitat disturbance
Forster, I. P. and R. A. Phillips (2009). "Influence of nest location, density and topography on breeding success in the Black-browed Albatross Thalassarche melanophris." Marine Ornithology 37(3): 213-217.	2009	SGSSI	NA	NA	NA	NA	NA	NA	Southern Ocean	Biology	Seabirds	Investigated relationships between characteristics and location of nesting sites within a breeding colony, age structure, and short and long-term reproductive output of breeders
Forcada, J., et al. (2009). "Modelling predation by transient leopard seals for an ecosystem-based management of Southern Ocean fisheries." Ecological Modelling 220(12): 1513-1521.	2009	SGSSI	NA	NA	NA	NA	NA	NA	Southern Ocean	Ecology	Mammalia	Evaluated the predatory impact of transient leopard seals on a community of mesopredators (seals and penguins) and their prey at South Georgia
Eden, B. R., et al. (2009). "Zooplankton community structure in a cyclonic and mode-water eddy in the Sargasso Sea." Deep-Sea Research Part I-Oceanographic Research Papers 56(10): 1757-1776.	2009	Bermuda	NA	NA	NA	NA	NA	NA	North-western Atlantic	Ecology	Plankton	Zooplankton community structure in a cyclonic eddy and an anti-cyclonic mode-water eddy in the Sargasso Sea
Dikou, A., et al. (2009). "Ecological assessment to detect imminent change in coral reefs of Admiral Cockburn Land and Sea National Park, Turks and Caicos Islands." Marine Ecology-an Evolutionary Perspective 30(4): 425-436.	2009	TCI	NA	NA	NA	NA	NA	NA	South Atlantic	Ecology	Comprehensive	Baseline data on benthic composition and coral community structure at seven reef sites of representative reefs of the TCIs within the Admiral Cockburn Land and Sea National Park
Cuthbert, R., et al. (2009). "Population trends and conservation status of the Northern Rockhopper Penguin Eudyptes moseleyi at Tristan da Cunha and Gough Island." Bird Conservation International 19(1): 109-120.	2009	Tristan	NA	NA	NA	NA	NA	NA	South Atlantic	Biology	Seabirds	Population trends of northern rockhopper penguin at Tristan da Cunha and Gough
Carlson, C. A., et al. (2009). "Seasonal dynamics of SAR11 populations in the euphotic and mesopelagic zones of the northwestern Sargasso Sea." Isme Journal 3(3): 283-295.	2009	Bermuda	NA	NA	NA	NA	NA	NA	North-western Atlantic	Biology	Microbial community	Distribution patterns of SAR11 abundance in the euphotic (0–120) and upper mesopelagic (160–300 m)
Campbell, L. M., et al. (2009). "Co-management of sea turtle fisheries: biogeography versus geopolitics." Marine Policy 33(1): 137-145.	2009	Anguilla	BVI	Montserrat	TCI	NA	NA	NA	Caribbean	Management	Chelonioidea	Fisher support for co-management
Brickle, P., et al. (2009). "Resource partitioning by two large planktivorous fishes Micromesistius australis and Macruronus magellanicus in the Southwest Atlantic." Estuarine Coastal and Shelf Science 84(1): 91-98.	2009	Falkland Islands	NA	NA	NA	NA	NA	NA	South Atlantic	Ecology	Fish	Ontogenetic, seasonal, bathymetric and regional variations in the feeding spectrum of southern blue whiting Micromesistius australis and hoki Macruronus magellanicus
Brew, H. S., et al. (2009). "Plankton community composition, organic carbon and thorium-234 particle size distributions, and particle export in the Sargasso Sea." Journal of Marine Research 67(6): 845-868.	2009	Bermuda	NA	NA	NA	NA	NA	NA	North-western Atlantic	Biogeochemistry	Plankton	Plankton community composition, carbon particulate export at BATS
Brandt, M. E. and J. W. McManus (2009). "Dynamics and impact of the coral disease white plague: Insights from a simulation model." Diseases of Aquatic Organisms 87(1-2): 117-133.	2009	Cayman Islands	NA	NA	NA	NA	NA	NA	Caribbean	Threat	Anthozoa	Modeling tool developed to test hypotheses about the spread and impact of white plague disease based on the dynamics of white plague over the course of 6 yr of monitoring on the forereefs of Little Cayman
Blumenthal, J. M., et al. (2009). "Diving behavior and movements of juvenile hawksbill turtles Eretmochelys imbricata on a Caribbean coral reef." Coral Reefs 28(1): 55-65.	2009	Cayman Islands	NA	NA	NA	NA	NA	NA	Caribbean	Biology	Chelonioidea	Habitat use of hawksbill turtles on a Caribbean coral reef
Blumenthal, J. M., et al. (2009). "Ecology of Hawksbill Turtles, Eretmochelys imbricata, on a Western Caribbean Foraging Ground." Chelonian Conservation and Biology 8(1): 1-10.	2009	Cayman Islands	NA	NA	NA	NA	NA	NA	Caribbean	Ecology	Chelonioidea	Ecology of juvenile hawksbill turtles
Blumenthal, J. M., et al. (2009). "Turtle groups or turtle soup: dispersal patterns of hawksbill turtles in the Caribbean." Molecular Ecology 18(23): 4841-4853.	2009	Cayman Islands	NA	NA	NA	NA	NA	NA	Caribbean	Genetics	Chelonioidea	Mixed stock analysis and examination of oceanic drift to elucidate movements of hawksbill turtles
Best, P. B., et al. (2009). "Cetacean records from Tristan da Cunha, South Atlantic." Journal of the Marine Biological Association of the United Kingdom 89(5): 1023-1032.	2009	Tristan	NA	NA	NA	NA	NA	NA	South Atlantic	Biodiversity stocktake	Mammalia	Examined cetacean fauna at the Tristan da Cunha archipelago from ship-based, aerial and land-based observations from 1983–2000, from strandings on Tristan da Cunha and Inaccessible Island between 1983 and 1995, and from whaling catch data from 1934–1967
Barnes, D. K. A., et al. (2009). "Geographic range shift responses to climate change by Antarctic benthos: where we should look." Marine Ecology Progress Series 393: 13-26.	2009	SGSSI	BAT	NA	NA	NA	NA	NA	Southern Ocean	Distribution	Mollusca, crustaceans, echinoderms, anthozoa	Investigated ranges of several SO taxa (bivalve and gastropod molluscs, amphipods, ophiuroids and hexacorals), and looked for hotspots of where the geographical range limits of different species coincided.
Ainley, D. G. and L. K. Blight (2009). "Ecological repercussions of historical fish extraction from the Southern Ocean." Fish and Fisheries 10(1): 13-38.	2009	SGSSI	BAT	NA	NA	NA	NA	NA	Southern Ocean	Threat	Mammalia, Seabirds	Effect of fisheries reducing fish biomass on Southern Ocean predators
Zapata-Guardiola, R. and P. J. Lopez-Gonzalez (2010). "Redescription of Thouarella brucei Thomson and Ritchie, 1906 (Cnidaria: Octocorallia: Primnoidae) and description of two new Antarctic primnoid species." Zootaxa(2616): 48-68.	2010	SGSSI	BAT	NA	NA	NA	NA	NA	Southern Ocean	Taxonomy	Anthozoa	New species discription
Witt, M. J., et al. (2010). "Inferring vertical and horizontal movements of juvenile marine turtles from time-depth recorders." Aquatic Biology 8(2): 169-177.	2010	BVI	NA	NA	NA	NA	NA	NA	Caribbean	Ecology	Chelonioidea	Juvenile diving patterns of hawksbill turtles
Wilson, J. W., et al. (2010). "Breeding biology of Brown Noddies Anous stolidus at their southern-most breeding site, Gough Island, in comparison to other sites." Ardea 98(2): 242-246.	2010	Tristan	NA	NA	NA	NA	NA	NA	South Atlantic	Biology	Seabirds	Description of breeding/fleding times and success of Brown Noddy Anous stolidus at Gough Island
Wilson, J. W., et al. (2010). "Breeding success of Northern Rockhopper Penguins (Eudyptes moseleyi) at Gough Island, South Atlantic Ocean." Emu 110(2): 137-141.	2010	Tristan	NA	NA	NA	NA	NA	NA	South Atlantic	Biology	Seabirds	Breeding success of northern rockhopper penguins on Gough Island
Waluda, C. M., et al. (2010). "Long-term variability in the abundance of Antarctic fur seals Arctocephalus gazella at Signy Island, South Orkneys." Polar Biology 33(3): 305-312.	2010	BAT	NA	NA	NA	NA	NA	NA	Southern Ocean	Biology	Mammalia	Results of annual census of Artarctic fur seas
Vorkamp, K., et al. (2010). "Polychlorinated biphenyls, organochlorine pesticides and polycyclic aromatic hydrocarbons in a one-off global survey of bivalves." Journal of Environmental Monitoring 12(5): 1141-1152.	2010	SGSSI	NA	NA	NA	NA	NA	NA	Southern Ocean	Ecotoxicology	Mollusca	Global survey of pollutants in bivalves but results for one species off Shetland Islands reported
Thatje, S. and N. C. Mestre (2010). "Energetic changes throughout lecithotrophic larval development in the deep-sea lithodid crab Paralomis spinosissima from the Southern Ocean." Journal of Experimental Marine Biology and Ecology 386(1-2): 119-124.	2010	SGSSI	NA	NA	NA	NA	NA	NA	Southern Ocean	Biology	Crustacea	Lecithotrophic development of endemic deep water crab
Staniland, I. J., et al. (2010). "Geographical variation in the behaviour of a central place forager: Antarctic fur seals foraging in contrasting environments." Marine Biology 157(11): 2383-2396.	2010	SGSSI	NA	NA	NA	NA	NA	NA	Southern Ocean	Distribution	Mammalia	Foraging behaviour of Antarctoc fur seals between SGSSI and Heard island
Schuhbauer, A., et al. (2010). "Growth and reproduction of Loxechinus albus (Echinodermata: Echinoidea) at the southerly peripheries of their species range, Falkland Islands (South Atlantic)." Marine Biology 157(8): 1837-1847.	2010	Falkland Islands	NA	NA	NA	NA	NA	NA	South Atlantic	Biology	Echinodermata	Growth and reproduction of Loxechinus albus
Schuchert, P. C., et al. (2010). "Traveling around Cape Horn: Otolith chemistry reveals a mixed stock of Patagonian hoki with separate Atlantic and Pacific spawning grounds." Fisheries Research 102(1-2): 80-86.	2010	Falkland Islands	NA	NA	NA	NA	NA	NA	South Atlantic	Biology	Fish	Population units of Patagonian hoki around Chile and Falkland Islands
Schneider, C. W., et al. (2010). "Notes on the marine algae of the Bermudas. 11. More additions to the benthic flora and a phylogenetic assessment of Halymenia pseudofloresii (Halymeniales, Rhodophyta) from its type locality." Phycologia 49(2): 154-168.	2010	Bermuda	NA	NA	NA	NA	NA	NA	North-western Atlantic	Taxonomy	Macroalgae	Description of marine algae
Schleyer, M. H. and Y. Benayahu (2010). "Pre- and post-1998 ENSO records of shallow-water octocorals (Alcyonacea) in the Chagos Archipelago." Marine Pollution Bulletin 60(12): 2197-2200.	2010	BIOT	NA	NA	NA	NA	NA	NA	Indian Ocean	Threat	Anthozoa	Description of recovery of octocorallia biodiversity after 1998 ENSO
Scheffer, A., et al. (2010). "Foraging behaviour of King Penguins (Aptenodytes patagonicus) in relation to predictable mesoscale oceanographic features in the Polar Front Zone to the north of South Georgia." Progress in Oceanography 86(1-2): 232-245.	2010	SGSSI	NA	NA	NA	NA	NA	NA	Southern Ocean	Distribution	Seabirds	Foraging strategy of King penguins
Salomon, M. and J. F. Voisin (2010). "Ecogeographical variation in the Southern Giant Petrel (Macronectes giganteus)." Canadian Journal of Zoology 88(2): 195-203.	2010	SGSSI	Falkland Islands	Tristan	BAT	NA	NA	NA	Southern Ocean, South Atlantic	Biology	Seabirds	Variation of characteristics of Southern Giant Petrel across its breeding range
Ridley, C., et al. (2010). "Identifying the origins of fishing gear ingested by seabirds: a novel multivariate approach." Aquatic Conservation-Marine and Freshwater Ecosystems 20(6): 621-631.	2010	SGSSI	NA	NA	NA	NA	NA	NA	Southern Ocean	Threat	Seabirds	Analysis of fishing gear collected from seabird nests to try to identify source
Reisinger, R. R. and M. N. Bester (2010). "Goose barnacles on seals and a penguin at gough Island." African Zoology 45(1): 129-132.	2010	Tristan	NA	NA	NA	NA	NA	NA	South Atlantic	Biology	Mammalia, Seabirds	Goose barnacles recorded on 12 elephant seasls and one northern rockhopper penguin
Reisinger, R. R. and M. N. Bester (2010). "Long distance breeding dispersal of a southern elephant seal." Polar Biology 33(9): 1289-1291.	2010	Tristan	NA	NA	NA	NA	NA	NA	South Atlantic	Distribution	Mammalia	Observation of breeding male elephant seal previously tagged 11 yrs previously at Marion Island
Reid, K., et al. (2010). "Krill population dynamics at South Georgia: implications for ecosystem-based fisheries management." Marine Ecology Progress Series 399: 243-252.	2010	SGSSI	NA	NA	NA	NA	NA	NA	Southern Ocean	Management	Plankton	Population dynamics model parameterised with acousitic surveys from 2001-2005 to explore recruitment patterns
Ratcliffe, N., et al. (2010). "The eradication of feral cats from Ascension Island and its subsequent recolonization by seabirds." Oryx 44(1): 20-29.	2010	Ascension	NA	NA	NA	NA	NA	NA	South Atlantic	Management	Seabirds	Description of feral cat eradication and recovery of seabird populations
Quillfeldt, P., et al. (2010). "Inter-annual changes in diet and foraging trip lengths in a small pelagic seabird, the thin-billed prion Pachyptila belcheri." Marine Biology 157(9): 2043-2050.	2010	Falkland Islands	NA	NA	NA	NA	NA	NA	South Atlantic	Ecology	Seabirds	Flexibility in foraging trip lengths of a small pelagic petrel, the thin-billed prion Pachyptila belcheri, over three breeding seasons
Price, A. R. G., et al. (2010). "Chagos feels the pinch: assessment of holothurian (sea cucumber) abundance, illegal harvesting and conservation prospects in British Indian Ocean Territory." Aquatic Conservation-Marine and Freshwater Ecosystems 20(1): 117-126.	2010	BIOT	NA	NA	NA	NA	NA	NA	Indian Ocean	Management	Echinodermata	Sea cucumber populations assessed around BIOT
Precht, W. F., et al. (2010). "Changing patterns of microhabitat utilization by the threespot damselfish, Stegastes planifrons, on caribbean reefs." Plos One 5(5).	2010	Cayman Islands	NA	NA	NA	NA	NA	NA	Caribbean	Biology	Fish	Shift in distribution and recruitment of threespot damselfish in response to looss of primary microhabitat, Stegastes planifrons
Pratchett, M. S., et al. (2010). "Are infestations of Cymo melanodactylus killing Acropora cytherea in the Chagos archipelago?" Coral Reefs 29(4): 941.	2010	BIOT	NA	NA	NA	NA	NA	NA	Indian Ocean	Biology	Crustacea	Infestations of Cymo melanodactylus documented.
Phillips, R. A., et al. (2010). "Ingestion of fishing gear and entanglements of seabirds: Monitoring and implications for management." Biological Conservation 143(2): 501-512.	2010	SGSSI	NA	NA	NA	NA	NA	NA	Southern Ocean	Threat	Seabirds	Monitoring of marine debris and fishing gear associated with seabird nests at Bird Island
Park, J., et al. (2010). "Variability of SeaWiFs chlorophyll-a in the southwest Atlantic sector of the Southern Ocean: strong topographic effects and weak seasonality." Deep-Sea Research Part I-Oceanographic Research Papers 57(4): 604-620.	2010	SGSSI	BAT	Falkland Islands	NA	NA	NA	NA	Southern Ocean, South Atlantic	Biology	Plankton	Analysed SeaWiFS chlorophyll-a concentrations to examine variability in phytoplankton blooms against topography/sea ice extent/currents etc
Nikula, R., et al. (2010). "Circumpolar dispersal by rafting in two subantarctic kelp-dwelling crustaceans." Marine Ecology Progress Series 405: 221-230.	2010	Falkland Islands	NA	NA	NA	NA	NA	NA	South Atlantic	Genetics	Crustacea	Examing phylogeographic structuring across the subantarctic in 2 widespread peracarid crustacean taxa that dwell within bull kelp holdfasts: Limnoria stephenseni and Parawaldeckia kidderi
Nevoux, M., et al. (2010). "Bet-hedging response to environmental variability, an intraspecific comparison." Ecology 91(8): 2416-2427.	2010	SGSSI	NA	NA	NA	NA	NA	NA	Southern Ocean	Biology	Seabirds	Compared the life histories of two Black-browed Albatross (Thalassarche melanophrys) populations breeding at South Georgia (Atlantic Ocean) and Kerguelen (Indian Ocean),
Nelson, W. A. and J. E. S. Broom (2010). "The identity of Porphyra columbina (Bangiales, Rhodophyta) originally described from the New Zealand subantarctic islands." Australian Systematic Botany 23(1): 16-26.	2010	Falkland Islands	NA	NA	NA	NA	NA	NA	South Atlantic	Taxonomy	Macroalgae	Description of Porphyra columbina
Morley, S. A., et al. (2010). "South Georgia: a key location for linking physiological capacity to distributional changes in response to climate change." Antarctic Science 22(6): 774-781.	2010	SGSSI	BAT	NA	NA	NA	NA	NA	South Atlantic	Distribution	Mollusca	Distributional differences between WAP and SGSSI molluscs
Malmstrom, R. R., et al. (2010). "Temporal dynamics of Prochlorococcus ecotypes in the Atlantic and Pacific oceans." Isme Journal 4(10): 1252-1264.	2010	Bermuda	NA	NA	NA	NA	NA	NA	North-western Atlantic	Distribution	Microbial community	Temporal and spatial dynamics of Prochlorococcus populations
Leese, F., et al. (2010). "Long-distance island hopping without dispersal stages: transportation across major zoogeographic barriers in a Southern Ocean isopod." Naturwissenschaften 97(6): 583-594.	2010	SGSSI	NA	NA	NA	NA	NA	NA	Southern Ocean	Genetics	Crustacea	Genetic structure and gene flow in Septemserolis septemcarinata
Laskowski, Z. and K. Zdzitowiecki (2010). "Contribution to the knowledge of the infection with Acanthocephala of a predatory Antarctic ice-fish Chaenocephalus aceratus." Polish Polar Research 31(4): 303-308.	2010	SGSSI	NA	NA	NA	NA	NA	NA	Southern Ocean	Biology	Fish	Infections of Blackfin icefish with Acanthocephala
Laptikhovsky, V., et al. (2010). "Squid as a resource shared by fish and humans on the Falkland Islands' shelf." Fisheries Research 106(2): 151-155.	2010	Falkland Islands	NA	NA	NA	NA	NA	NA	South Atlantic	Ecology	Cephalopoda	Investigates the importance in fish diet of squid and assesses the scale of possible impact of fisheries.
la Mesa, M., et al. (2010). "Some reproductive traits of the Tristan klipfish, Bovichtus diacanthus (Carmichael 1819) (Notothenioidei: Bovichtidae) from Tristan da Cunha (South Atlantic)." Polar Biology 33(3): 337-346.	2010	Tristan	NA	NA	NA	NA	NA	NA	South Atlantic	Biology	Fish	Reproductive traits of the Tristan klipfish
Korb, R. E., et al. (2010). "Summer microplankton community structure across the Scotia Sea: implications for biological carbon export." Biogeosciences 7(1): 343-356.	2010	SGSSI	BAT	NA	NA	NA	NA	NA	Southern Ocean	Biogeochemistry	Plankton	Microplankton community structure and carbon export
Klevjer, T. A., et al. (2010). "Swarm characteristics of Antarctic krill Euphausia superba relative to the proximity of land during summer in the Scotia Sea." Marine Ecology Progress Series 409: 157-170.	2010	BAT	SGSSI	NA	NA	NA	NA	NA	Southern Ocean	Distribution	Plankton	Studied the relationship between the proximity of land and the distribution and swarming characteristics of Antarctic krill across the Scotia Sea
Jones, R. (2010). "Environmental contamination associated with a marine landfill ('seafill') beside a coral reef." Marine Pollution Bulletin 60(11): 1993-2006.	2010	Bermuda	NA	NA	NA	NA	NA	NA	North-western Atlantic	Ecotoxicology	Other	Environmental contamination from landfill site
Hoshino, E., et al. (2010). "Economically Optimal Management Strategies for the South Georgia Patagonian Toothfish Fishery." Marine Resource Economics 25(3): 265-280.	2010	SGSSI	NA	NA	NA	NA	NA	NA	Southern Ocean	Management	Fish	Alternative stock assessment model for Patagonian toothfish parameterised using CCAMLR data
Hoffman, J. I., et al. (2010). "Getting Long in the Tooth: A Strong Positive Correlation between Canine Size and Heterozygosity in Antarctic Fur Seals Arctocephalus gazella." Journal of Heredity 101(5): 527-538.	2010	SGSSI	NA	NA	NA	NA	NA	NA	Southern Ocean	Biology	Mammalia	Used canine teeth of Antarctic fur seals to explore links between genetic variation and important life-history traits in free-ranging vertebrate populations.
Henderson, A. C. and A. I. Arkhipkin (2010). "Maturity index validation in the white-spotted skate Bathyraja albomaculata, from the Falkland Islands." Journal of the Marine Biological Association of the United Kingdom 90(5): 1015-1018.	2010	Falkland Islands	NA	NA	NA	NA	NA	NA	South Atlantic	Biology	Fish	Reproductive system of Bathyraja albomaculata
Graham, N. A. J., et al. (2010). "Reef shark declines in remote atolls highlight the need for multi-faceted conservation action." Aquatic Conservation-Marine and Freshwater Ecosystems 20(5): 543-548.	2010	BIOT	NA	NA	NA	NA	NA	NA	Indian Ocean	Management	Fish	Abundance and composition of reef shark populations at Chagos archipelago
Goodbody-Gringley, G., et al. (2010). "Limited gene flow in the brooding coral Favia fragum (Esper, 1797)." Marine Biology 157(12): 2591-2602.	2010	Bermuda	NA	NA	NA	NA	NA	NA	North-western Atlantic	Genetics	Anthozoa	Population genetic structure of the brooding coral Favia fragum across wider Caribbean
Fourqurean, J. W., et al. (2010). "Effects of excluding sea turtle herbivores from a seagrass bed: overgrazing may have led to loss of seagrass meadows in Bermuda." Marine Ecology Progress Series 419: 223-232.	2010	Bermuda	NA	NA	NA	NA	NA	NA	North-western Atlantic	Ecology	Macroalgae, Chelonioidea	Megaherbivore exclusion - response of seaweed
Dissanayake, A. and S. D. Bamber (2010). "Monitoring PAH contamination in the field (South west Iberian Peninsula): Biomonitoring using fluorescence spectrophotometry and physiological assessments in the shore crab Carcinus maenas (L.) (Crustacea: Decapoda)." Marine Environmental Research 70(1): 65-72.	2010	Gibraltar	NA	NA	NA	NA	NA	NA	Mediterranean	Ecotoxicology	Crustacea	Contamination assessed through shore crabs
Crelier, A. M., et al. (2010). "Distribution patterns of chaetognata, polychaeta, pteropoda and salpidae off South Georgia and South Orkney Islands." Brazilian Journal of Oceanography 58(4): 287-298.	2010	SGSSI	BAT	NA	NA	NA	NA	NA	Southern Ocean	Distribution	Plankton	Distribution pattern, frequency and density (ind./1000 m) of different mesozooplankton species from the South Georgia Islands, South Orkney Islands and the Weddell-Scotia Confluence
Collins, M. A., et al. (2010). "Expanded description of Opisthoteuthis hardyi based on new specimens from the Patagonian slope." Journal of the Marine Biological Association of the United Kingdom 90(3): 605-611.	2010	Falkland Islands	BAT	NA	NA	NA	NA	NA	Southern Ocean	Distribution	Cephalopoda	Expanded description of Opisthoteuthis hardyi from new catches
Brown, J., et al. (2010). "Solitary spawning revealed - an in situ observation of spawning behaviour of Doryteuthis (Amerigo) gahi (d'Orbigny, 1835 in 1834-1847) (Cephalopoda: Loliginidae) in the Falkland Islands." Journal of Natural History 44(33-34): 2041-2047.	2010	Falkland Islands	NA	NA	NA	NA	NA	NA	South Atlantic	Biology	Cephalopoda	Spawning behaviour of Doryteuthis gahi
Brown, J., et al. (2010). "An experimental investigation of the 'umbrella' and 'Spanish' system of longline fishing for the Patagonian toothfish (Dissostichus eleginoides) in the Falkland Islands Implications for stock assessment and seabird by-catch." Fisheries Research 106(3): 404-412.	2010	Falkland Islands	NA	NA	NA	NA	NA	NA	South Atlantic	Management	Fish, mammalia, seabirds	Examined the relationship between umbrella and Spanish longline systems for catching Patagonian toothfish
Brooke, M. d. L., et al. (2010). "Potential for rat predation to cause decline of the globally threatened Henderson petrel Pterodroma atrata: Evidence from the field, stable isotopes and population modelling." Endangered Species Research 11(1): 47-59.	2010	Pitcairn	NA	NA	NA	NA	NA	NA	South Pacific	Threat	Seabirds	Determined contribution of marine components to rats diets
Bowen, B. W., et al. (2010). An odyssey of the green sea turtle: Ascension Island revisited. Molecular Ecology and Evolution: The Organismal Side: Selected Writings from the Avise Laboratory: 365-368.	2010	Ascension	NA	NA	NA	NA	NA	NA	South Atlantic	Genetics	Chelonioidea	Genetic divergence among several widely separated green turtle rookeries
Blumenthal, J. M., et al. (2010). "Life in (and out of) the lagoon: fine-scale movements of green turtles tracked using time-depth recorders." Aquatic Biology 9(2): 113-121.	2010	Cayman Islands	NA	NA	NA	NA	NA	NA	Caribbean	Distribution	Chelonioidea	Distribution and daily movements of juvenile green turtles Chelonia mydas exposed to a legal marine turtle fishery in the Cayman Islands
Biuw, M., et al. (2010). "Long-range migration of a chinstrap penguin from Bouvetoya to Montagu Island, South Sandwich Islands." Antarctic Science 22(2): 157-162.	2010	SGSSI	NA	NA	NA	NA	NA	NA	Southern Ocean	Distribution	Seabirds	Describes long-range migration of a pre-moulting adult chinstrap penguin from Bouvetøya to the South Sandwich Islands
Bester, M. N. and R. R. Reisinger (2010). "Vagrant Antarctic fur seals at Gough Island in 2009." Polar Biology 33(5): 709-711.	2010	Tristan	NA	NA	NA	NA	NA	NA	South Atlantic	Distribution	Mammalia	Describes observations of Antarctic fur seals
Bates, N. R., et al. (2010). "Feedbacks and responses of coral calcification on the Bermuda reef system to seasonal changes in biological processes and ocean acidification (vol 7, pg 2509, 2010)." Biogeosciences 7(10): 3005-3006.	2010	Bermuda	NA	NA	NA	NA	NA	NA	North-western Atlantic	Biogeochemistry	Anthozoa	Present and future potential impact of rising carbon dioxide (CO2) levels and ocean acidification on coral reef ecosystems in their natural environment
Ashford, J., et al. (2010). "Testing early life connectivity using otolith chemistry and particle-tracking simulations." Canadian Journal of Fisheries and Aquatic Sciences 67(8): 1303-1315.	2010	BAT	SGSSI	NA	NA	NA	NA	NA	Southern Ocean	Biology	Fish	Otolith chemistry of adult Scotia Sea icefish (Chaenocephalus aceratus)
Arkhipkin, A. I., et al. (2010). "An antipodal link between the North Pacific and South Atlantic Oceans?" Deep-Sea Research Part I-Oceanographic Research Papers 57(8): 1009-1011.	2010	Falkland Islands	NA	NA	NA	NA	NA	NA	South Atlantic	Biology	Fish, cephalopods	Report on finding of several endemic species of North Pacific deepwater fish and squid on the continental slope of the Falkland Islands in the Southwest Atlantic - giant rattail grenadier Albatrossia pectoralis, pelagic eelpout Lycodapus endemoscotus, and squid Gonatopsis octopedatus
Anderson, O. R. J., et al. (2010). "Element patterns in albatrosses and petrels: influence of trophic position, foraging range, and prey type." Environmental Pollution 158(1): 98-107.	2010	SGSSI	NA	NA	NA	NA	NA	NA	Southern Ocean	Ecology	Seabirds	Measured concentrations of 22 essential and non-essential elements among a community of Procellariiformes (and their prey) to identify the extent to which trophic position and foraging range
Banford, H. M. (2010). "Hyporhamphus collettei, a new species of inshore halfbeak (Hemiramphidae) endemic to Bermuda, with comments on the biogeography of the Hyporhamphus unifasciatus species group." Proceedings of the Biological Society of Washington 123(4): 345-358.	2010	Bermuda	NA	NA	NA	NA	NA	NA	North-western Atlantic	Taxonomy	Fish	Description of new endemic species of inshore halfbeak
Zuidema, C., et al. (2011). "To preserve or to develop? East Bay dredging project, South Caicos, Turks and Caicos Islands." Journal of Coastal Conservation 15(4): 555-563.	2011	TCI	NA	NA	NA	NA	NA	NA	Caribbean	Economics	NA	Economic value of ecosystem services provided by east bay prior to dredging for development
Zerbini, A. N., et al. (2011). "Migration and summer destinations of humpback whales (megaptera novaeangliae) in the western South Atlantic Ocean." Journal of Cetacean Research and Management(SPEC. ISS. 3): 113-118.	2011	SGSSI	NA	NA	NA	NA	NA	NA	Southern Ocean	Distribution	Mammalia	GPS tagged 7 humpack whales off Brazil and identified summer foraging grounds in SGSSI
Zablocki, J. A., et al. (2011). "Diel Aquatic CO2 System Dynamics of a Bermudian Mangrove Environment." Aquatic Geochemistry 17(6): 841-859.	2011	Bermuda	NA	NA	NA	NA	NA	NA	North-western Atlantic	Biogeochemistry	Other	Examined diel dynamics of seawater CO2 and dissolved oxygen for a mangrove-dominated marine ecosystem and an adjacent intracoastal waterway
Whitehouse, M. J., et al. (2011). "Close coupling between ammonium uptake by phytoplankton and excretion by Antarctic krill, Euphausia superba." Deep-Sea Research Part I-Oceanographic Research Papers 58(7): 725-732.	2011	SGSSI	NA	NA	NA	NA	NA	NA	Southern Ocean	Biology	Plankton	Phytoplankton abundance and N uptake rates and ammonia production
Weir, C. R., et al. (2011). "Cetacean encounters around the island of Montserrat (Caribbean Sea) during 2007 and 2010, including new species state records." Marine Biodiversity Records 4.	2011	Montserrat	NA	NA	NA	NA	NA	NA	Caribbean	Biodiversity stocktake	Mammalia	Cetacean records around Montserrat
Weber, S. B., et al. (2011). "Rate of egg maturation in marine turtles exhibits 'universal temperature dependence'." Journal of Animal Ecology 80(5): 1034-1041.	2011	Ascension	NA	NA	NA	NA	NA	NA	South Atlantic	Biology	Chelonioidea	Relationship between egg maturation and temperature
Wall-Palmer, D., et al. (2011). "Explosive volcanism as a cause for mass mortality of pteropods." Marine Geology 282(3-4): 231-239.	2011	Montserrat	NA	NA	NA	NA	NA	NA	Caribbean	Biology	Mollusca	Impact of volcanic eruptions on pteropods mass mortality
Wakefield, E. D., et al. (2011). "Habitat preference, accessibility, and competition limit the global distribution of breeding Black-browed Albatrosses." Ecological Monographs 81(1): 141-167.	2011	SGSSI	Falkland Islands	NA	NA	NA	NA	NA	South Atlantic, Southern Ocean	Distribution	Seabirds	Used tracks of 163 breeding Black-browed Albatrosses and eight closely related Campbell Albatrosses T. impavida from nine colonies to quatify spatio-temporal distribution and habitat usage
van Hengstum, P. J. and D. B. Scott (2011). "Ecology of formaninfera and habitat variability in an underwater cave: distinguishing anchihaline versus submarine cave environments." Journal of Foraminiferal Research 41(3): 201-229.	2011	Bermuda	NA	NA	NA	NA	NA	NA	North-western Atlantic	Ecology	Other	Investigated foraminiferal ecology and habitat variability in underwater coastal caves from sediment samples
Tucker, K. P., et al. (2011). "Diversity and distribution of single-stranded DNA phages in the North Atlantic Ocean." Isme Journal 5(5): 822-830.	2011	Bermuda	NA	NA	NA	NA	NA	NA	North-western Atlantic	Genetics	Microbial community	Two complete genomes of phages (viruses that infect bacteria) from 80 m depth at BATS
Titley-O'Neal, C. P., et al. (2011). "The relationship between imposez and tributyltin (TBT) concentration in Strombus gigas from the British Virgin Islands." Bulletin of Marine Science 87(3): 421-435.	2011	BVI	NA	NA	NA	NA	NA	NA	Caribbean	Ecotoxicology	Mollusca	Incidence and severity of imposex and relationship with TBT
Schneider, C. W., et al. (2011). "Notes on the marine algae of the Bermudas. 12. A phylogenetic assessment of Nemastoma gelatinosum M. Howe (Rhodophyta, Nemastomatales) from its type locality." Cryptogamie Algologie 32(4): 313-325.	2011	Bermuda	NA	NA	NA	NA	NA	NA	North-western Atlantic	Taxonomy	Macroalgae	Genetic markers used to inform taxonomy
Schneider, C. W., et al. (2011). "A new genus and species from the North Atlantic, Archestenogramma profundum (Phyllophoraceae, Rhodophyta), with taxonomic resolution of the orphaned Leptofauchea brasiliensis." European Journal of Phycology 46(4): 442-452.	2011	Bermuda	NA	NA	NA	NA	NA	NA	North-western Atlantic	Taxonomy	Macroalgae	Morphological and anatomical evaluation of two red algae to inform taxonomy
Ryan, P. G. and R. A. Ronconi (2011). "Continued increase in numbers of spectacled petrels Procellaria conspicillata." Antarctic Science 23(4): 332-336.	2011	Tristan	NA	NA	NA	NA	NA	NA	South Atlantic	Biology	Seabirds	Census of breeding spectacled petrels during incubation Oct-Nov
Rutschmann, S., et al. (2011). "Parallel ecological diversification in Antarctic notothenioid fishes as evidence for adaptive radiation." Molecular Ecology 20(22): 4707-4721.	2011	SGSSI	BAT	NA	NA	NA	NA	NA	South Atlantic, Southern Ocean	Ecology	Fish	Ecology and foraging habitats of Antarctic notothenioid fishes
Robson, B., et al. (2011). "Revised population estimate and trends for the Endangered Northern Rockhopper Penguin Eudyptes moseleyi at Tristan da Cunha." Bird Conservation International 21(4): 454-459.	2011	Tristan	NA	NA	NA	NA	NA	NA	South Atlantic	Biology	Seabirds	Census of whole island group of Northern Rockhopper Penguins
Roberts, J., et al. (2011). "The diet of toothfish species Dissostichus eleginoides and Dissostichus mawsoni with overlapping distributions." Journal of Fish Biology 79(1): 138-154.	2011	SGSSI	NA	NA	NA	NA	NA	NA	Southern Ocean	Ecology	Fish	Diet of Antarctic toothfish Dissostichus mawsoni vs Patagonian toothfish Dissostichus eleginoides
Randhawa, H. S. and P. Brickle (2011). "Larval parasite gene sequence data reveal cryptic trophic links in life cycles of porbeagle shark tapeworms." Marine Ecology Progress Series 431: 215-222.	2011	Falkland Islands	NA	NA	NA	NA	NA	NA	South Atlantic	Ecology	Fish	Porbeagle sharks Lamnanasus tapeworm parasites transmission through feeding on squid
Quillfeldt, P., et al. (2011). "Flexible foraging behaviour of a sexually dimorphic seabird: large males do not always dive deep." Marine Ecology Progress Series 428: 271-287.	2011	Falkland Islands	NA	NA	NA	NA	NA	NA	South Atlantic	Distribution	Seabirds	Sex differences in foraging behaviour of size-dimorphic imperial shags Phalacrocorax atriceps albiventer breeding at New Island, Falkland Islands/Islas Malvinas
Phillips, R. A., et al. (2011). "Sexual segregation in distribution, diet and trophic level of seabirds: insights from stable isotope analysis." Marine Biology 158(10): 2199-2208.	2011	SGSSI	NA	NA	NA	NA	NA	NA	Southern Ocean	Ecology	Seabirds	Sex-related dietary specialisation
Meylan, P. A., et al. (2011). "The ecology and migrations of sea turtles 8. Tests of the developmental habitat hypothesis." Bulletin of the American Museum of Natural History(357): 1-70.	2011	Bermuda	NA	NA	NA	NA	NA	NA	North-western Atlantic	Biology	Chelonioidea	37 yr study of turtles (Chelonia mydas, Eretmochelys imbricata) for developmental habitat
Maloney, B., et al. (2011). "Effect of nutrient enrichment on naturally occurring macroalgal species in six cave pools in Bermuda." Phycologia 50(2): 132-143.	2011	Bermuda	NA	NA	NA	NA	NA	NA	North-western Atlantic	Biology	Macroalgae	Effect of nutrient loading on macroalgal species in anchialine cave pools
Main, C. E. and M. A. Collins (2011). "Diet of the Antarctic starry skate Amblyraja georgiana (Rajidae, (Chondrichthyes) at South Georgia (Southern Ocean)." Polar Biology 34(3): 389-396.	2011	SGSSI	NA	NA	NA	NA	NA	NA	Southern Ocean	Ecology	Fish	Diet of Antarctic starry skate
Laptikhovsky, V., et al. (2011). "Species range shifts due to environmental changes in scaled squid, Pholidoteuthis massyae and bathyal octopus, Muusoctopus eureka." Marine Biodiversity Records 4.	2011	Falkland Islands	NA	NA	NA	NA	NA	NA	South Atlantic	Biology	Cephalopoda	Record of mesopelagic scaled squid, Pholidoteuthis massyae, and epimesobathyal octopus, Muusoctopus eureka
Laptikhovsky, V. (2011). "Migrations and structure of the species range in ridge-scaled rattail Macrourus carinatus (Southwest Atlantic) and their application to fisheries management." Ices Journal of Marine Science 68(2): 309-318.	2011	Falkland Islands	NA	NA	NA	NA	NA	NA	South Atlantic	Biology	Fish	Biology, distribution and abundance of the ridge-scaled rattail (Macrourus carinatus)
Iwami, T., et al. (2011). "Annual changes in species composition and abundance of mytophid fish in the north of South Georgia (subarea 48.3), Antarctica, during austral winters from 2002 to 2008." CCAMLR Science 18: 155-165.	2011	SGSSI	NA	NA	NA	NA	NA	NA	Southern Ocean	Biology	Fish	Species composition and abundance of myctophid fish during austral winters
Hogg, O. T., et al. (2011). "Highly diverse, poorly studied and uniquely threatened by climate change: an assessment of marine biodiversity on South Georgia's continental shelf." Plos One 6(5).	2011	SGSSI	NA	NA	NA	NA	NA	NA	Southern Ocean	Biogeography	Comprehensive	Benthic biogeography
Granadeiro, J. P., et al. (2011). "Albatrosses following fishing vessels: how badly hooked are they on an easy meal?" Plos One 6(3).	2011	Falkland Islands	NA	NA	NA	NA	NA	NA	South Atlantic	Distribution	Seabirds	Association of black-browed albatrosses from two different breeding grounds with fisheries
Goodwin, C., et al. (2011). "Sponge biodiversity of the Jason Islands and Stanley, Falkland Islands with descriptions of twelve new species." Journal of the Marine Biological Association of the United Kingdom 91(2 SPEC. ISSUE): 275-301.	2011	Falkland Islands	NA	NA	NA	NA	NA	NA	South Atlantic	Biodiversity stocktake	Porifera	Description of sponge species around Falkland Islands including new species
Gonzalez-Wevar, C. A., et al. (2011). "Phylogeography and demographic inference in Nacella (Patinigera) concinna (Strebel, 1908) in the western Antarctic Peninsula." Deep-Sea Research Part Ii-Topical Studies in Oceanography 58(1-2): 220-229.	2011	BAT	NA	NA	NA	NA	NA	NA	Southern Ocean	Genetics	Mollusca	Phylogeographic pattern and historical demography of the the limpet Nacella (Patinigera) concinna
Forster, J., et al. (2011). "Marine biodiversity in the Caribbean UK overseas territories: perceived threats and constraints to environmental management." Marine Policy 35(5): 647-657.	2011	Bermuda	Anguilla	BVI	Cayman Islands	TCI	Montserrat	NA	Caribbean, North-western Atlantic	Management	NA	Perceived status and threats to marine environments
Forrester, G. E., et al. (2011). "Evaluating methods for transplanting endangered elkhorn corals in the Virgin Islands." Restoration Ecology 19(3): 299-306.	2011	BVI	NA	NA	NA	NA	NA	NA	Caribbean	Management	Anthozoa	Methods for transplanting Acropora palmata (the elkhorn coral) for restoration
Edwards, C. T. T., et al. (2011). "Bioeconomic evaluation of fisheries enforcement effort using a multifleet simulation model." Fisheries Research 107(1-3): 253-260.	2011	SGSSI	NA	NA	NA	NA	NA	NA	Southern Ocean	Management	Fish	Model of South Georgia toothfish longline fishery to evaluate current enforcement efforts
Cunningham, A., et al. (2011). "Two-component modeling of the optical properties of a diatom bloom in the Southern Ocean." Remote Sensing of Environment 115(6): 1434-1442.	2011	SGSSI	NA	NA	NA	NA	NA	NA	Southern Ocean	Biology	Plankton	Optical properties of a diatom bloom
Cox, M. J., et al. (2011). "Spatial and temporal variability in the structure of aggregations of Antarctic krill (Euphausia superba) around South Georgia, 1997-1999." Ices Journal of Marine Science 68(3): 489-498.	2011	SGSSI	NA	NA	NA	NA	NA	NA	Southern Ocean	Biology	Plankton	Spatial and temporal variability in the structure of aggregations of Antarctic krill
Catry, P., et al. (2011). "Demographic parameters of black-browed albatrosses Thalassarche melanophris from the Falkland Islands." Polar Biology 34(8): 1221-1229.	2011	Falkland Islands	NA	NA	NA	NA	NA	NA	South Atlantic	Biology	Seabirds	Demography of black-browed albatross
Catry, P., et al. (2011). "Low breeding success and sharp population decline at the largest known Falkland skua colony." Polar Biology 34(8): 1239-1241.	2011	Falkland Islands	NA	NA	NA	NA	NA	NA	South Atlantic	Biology	Seabirds	Population decline of Falkland skua reported
Bibby, T. S. and C. M. Moore (2011). "Silicate: nitrate ratios of upwelled waters control the phytoplankton community sustained by mesoscale eddies in sub-tropical North Atlantic and Pacific." Biogeosciences 8(3): 657-666.	2011	Bermuda	NA	NA	NA	NA	NA	NA	North-western Atlantic	Ecology	Plankton	Influence of silcate and nitrate on phytoplankton community structure
Betancur-R, R., et al. (2011). "Reconstructing the lionfish invasion: insights into Greater Caribbean biogeography." Journal of Biogeography 38(7): 1281-1293.	2011	Bermuda	Cayman Islands	NA	NA	NA	NA	NA	Caribbean, North-western Atlantic	Genetics	Fish	Spread of lionfish invasion across Greater Caribbean
Källqvist, E. and A. Monllor (2012). "Two new findings of large maturing and spent females of deep sea squid Gonatus antarcticus on the continental slope in the south-west Atlantic." ANZIAM Journal 5(3).	2012	Falkland Islands	NA	NA	NA	NA	NA	NA	South Atlantic	Biology	Cephalopoda	Description of two giant squids caught by pelagic fishing vessels
Horswill, C. and J. A. Jackson (2012). "Humpback whales wintering at Pitcairn Island, South Pacific." ANZIAM Journal 5(3).	2012	Pitcairn	NA	NA	NA	NA	NA	NA	South Pacific	Distribution	Mammalia	Observations of humpback whales overwintering
Young, E. F., et al. (2012). "Physical and behavioural influences on larval fish retention: contrasting patterns in two Antarctic fishes." Marine Ecology Progress Series 465: 201-215.	2012	SGSSI	NA	NA	NA	NA	NA	NA	Southern Ocean	Biology	Fish	Numerical modelling approach to examine the influence of oceanographic and life-history variability on the dispersal and retention of 2 Antarctic fishes: Champsocephalus gunnari (mackerel icefish) and Notothenia rossii (marbled rockcod).
Yost, D. M., et al. (2012). "Quantification of total and particulate dimethylsulfoniopropionate (DMSP) in five Bermudian coral species across a depth gradient." Coral Reefs 31(2): 561-570.	2012	Bermuda	NA	NA	NA	NA	NA	NA	North-western Atlantic	Biology	Other	Dimethylsulfoniopropionate concentrations measured in coral/zooanthellae
Yang, S. Y., et al. (2012). "Diversity and Distribution of Symbiodinium Associated with Seven Common Coral Species in the Chagos Archipelago, Central Indian Ocean." Plos One 7(5).	2012	BIOT	NA	NA	NA	NA	NA	NA	Indian Ocean	Biology	Other	Examined Symbiodinium diversity and distribution associated with scleractinian corals in five atolls of the Chagos Archipelago
Whitehouse, M. J., et al. (2012). "Substantial primary production in the land-remote region of the central and northern Scotia Sea." Deep-Sea Research Part Ii-Topical Studies in Oceanography 59: 47-56.	2012	SGSSI	NA	NA	NA	NA	NA	NA	Southern Ocean	Biology	Plankton	Used data from transects across the central Scotia Sea in spring, summer and autumn combined with satellite data, to obtain a larger-scale appreciation of the latitudinal contrasts in phytoplankton standing stock and primary production across the region
Weber, S. B., et al. (2012). "Fine-scale thermal adaptation in a green turtle nesting population." Proceedings of the Royal Society B-Biological Sciences 279(1731): 1077-1084.	2012	Ascension	NA	NA	NA	NA	NA	NA	South Atlantic	Biology	Chelonioidea	Compared survival (as a measure of fitness), developmental rates and size at hatching for offspring at different incubation temperatures
Watts, J. and G. A. Tarling (2012). "Population dynamics and production of Themisto gaudichaudii (Amphipoda, Hyperiidae) at South Georgia, Antarctica." Deep-Sea Research Part Ii-Topical Studies in Oceanography 59: 117-129.	2012	SGSSI	NA	NA	NA	NA	NA	NA	Southern Ocean	Biology	Crustacea	Population dynamics, individual growth rates and productivity of the hyperiid amphipod Themisto gaudichaudii
Wakefield, E. D., et al. (2012). "Foraging black-browed albatrosses target waters overlaying moraine banks - a consequence of upward benthic-pelagic coupling?" Antarctic Science 24(3): 269-280.	2012	SGSSI	NA	NA	NA	NA	NA	NA	Southern Ocean	Biogeography	Seabirds	Sub-mesoscale habitat use of breeding black-browed albatrosses
van Hooidonk, R. J., et al. (2012). "Coral bleaching at Little Cayman, Cayman Islands 2009." Estuarine, Coastal and Shelf Science 106: 80-84.	2012	Cayman Islands	NA	NA	NA	NA	NA	NA	Caribbean	Management	Anthozoa	Describes aspects of the most prevalent episode of coral bleaching ever recorded at Little Cayman, Cayman Islands, during the fall of 2009, and use to inform bleaching predictions
Treusch, A. H., et al. (2012). "Phytoplankton distribution patterns in the northwestern Sargasso Sea revealed by small subunit rRNA genes from plastids." Isme Journal 6(3): 481-492.	2012	Bermuda	NA	NA	NA	NA	NA	NA	North-western Atlantic	Biology	Plankton	Taxon-specific phytonplankton blooms
Trathan, P. N., et al. (2012). "Ecological drivers of change at South Georgia: the krill surplus, or climate variability." Ecography 35(11): 983-993.	2012	SGSSI	NA	NA	NA	NA	NA	NA	Southern Ocean	Biology	Seabirds	Census of macaroni penguins
Szczys, P., et al. (2012). "Conservation genetics of the Common Tern (Sterna hirundo) in the North Atlantic region; implications for the critically endangered population at Bermuda." Conservation Genetics 13(4): 1039-1043.	2012	Bermuda	NA	NA	NA	NA	NA	NA	North-western Atlantic	Biology	Seabirds	Genetic diversity of the pre- and post-bottleneck populations of the Common Tern
Strugnell, J. M., et al. (2012). "Persistent genetic signatures of historic climatic events in an Antarctic octopus." Molecular Ecology 21(11): 2775-2787.	2012	BAT	SGSSI	NA	NA	NA	NA	NA	Southern Ocean	Biology	Cephalopoda	Examine genetic structure in the directdeveloping, endemic Southern Ocean octopod Pareledone turqueti sampled from a broad range of areas that circumvent Antarctica
Stowasser, G., et al. (2012). "Fatty acid trophic markers elucidate resource partitioning within the demersal fish community of South Georgia and Shag Rocks (Southern Ocean)." Marine Biology 159(10): 2299-2310.	2012	SGSSI	NA	NA	NA	NA	NA	NA	Southern Ocean	Ecology	Fish	Fatty acid analysis used to study the trophic ecology of 10 demersal fish species in the South Georgia region
Stowasser, G., et al. (2012). "Food web dynamics in the Scotia Sea in summer: a stable isotope study." Deep-Sea Research Part Ii-Topical Studies in Oceanography 59: 208-221.	2012	SGSSI	BAT	NA	NA	NA	NA	NA	Southern Ocean	Ecology	Comprehensive	Food web ecology from stable isotopes
Steinberg, D. K., et al. (2012). "Long-term increase in mesozooplankton biomass in the Sargasso Sea: linkage to climate and implications for food web dynamics and biogeochemical cycling." Global Biogeochemical Cycles 26.	2012	Bermuda	NA	NA	NA	NA	NA	NA	North-western Atlantic	Biology	Plankton	Changes in zooplankton biomass and species composition over 17 years at BATS
Staniland, I. J., et al. (2012). "Winter distribution and haul-out behaviour of female Antarctic fur seals from South Georgia." Marine Biology 159(2): 291-301.	2012	SGSSI	NA	NA	NA	NA	NA	NA	Southern Ocean	Biology	Mammalia	Tracked 16 female Antarctic fur seals from South Georgia during the austral winter
Shelley, R. U., et al. (2012). "Controls on dissolved cobalt in surface waters of the Sargasso Sea: comparisons with iron and aluminum." Global Biogeochemical Cycles 26.	2012	Bermuda	NA	NA	NA	NA	NA	NA	North-western Atlantic	Biogeochemistry	Plankton	Influence of phytoplankton on cobalt concentration in water column
Shatova, O., et al. (2012). "Contribution of zooplankton fecal pellets to deep ocean particle flux in the Sargasso Sea assessed using quantitative image analysis." Journal of Plankton Research 34(10): 905-921.	2012	Bermuda	NA	NA	NA	NA	NA	NA	North-western Atlantic	Biogeochemistry	Plankton	Contribution of zooplankton fecal pellets to deep ocean particle flux
Seear, P. J., et al. (2012). "Seasonal and spatial influences on gene expression in Antarctic krill Euphausia superba." Marine Ecology Progress Series 467: 61-+.	2012	SGSSI	BAT	NA	NA	NA	NA	NA	Southern Ocean	Biology	Plankton	Compared gene expression between female adult krill caught during summer and winter near the Antarctic Peninsula (60° S), and between Peninsula krill and krill caught near South Georgia (54° S) during the same winter
Scheffer, A., et al. (2012). "Frontal zones, temperature gradient and depth characterize the foraging habitat of king penguins at South Georgia." Marine Ecology Progress Series 465: 281-297.	2012	SGSSI	NA	NA	NA	NA	NA	NA	Southern Ocean	Biogeography	Seabirds	Foraging habitat of king penguins at South Georgia
Roa-Ureta, R. H. (2012). "Modelling in-season pulses of recruitment and hyperstability-hyperdepletion in the Loligo gahi fishery around the Falkland Islands with generalized depletion models." Ices Journal of Marine Science 69(8): 1403-1415.	2012	Falkland Islands	NA	NA	NA	NA	NA	NA	South Atlantic	Management	Cephalopoda	Testing a model for stock assessment
Riegl, B. M., et al. (2012). "Human impact on atolls leads to coral loss and community homogenisation: A Modeling Study." Plos One 7(6).	2012	BIOT	NA	NA	NA	NA	NA	NA	Indian Ocean	Biology	Anthozoa	Provide hind- and forecast data for coral population dynamics within lagoons and on ocean-facing reefs verified against monitoring from 1979–2009 adding human impact
Richardson, J., et al. (2012). "Changes in distribution, relative abundance, and species composition of large whales around South Georgia from opportunistic sightings: 1992 to 2011." Endangered Species Research 19(2): 149-156.	2012	SGSSI	NA	NA	NA	NA	NA	NA	Southern Ocean	Biology	Mammalia	Examined general population trends of large whales in South Georgia waters
Rey, A. R., et al. (2012). "Stable isotopes identify age- and sex-specific dietary partitioning and foraging habitat segregation in southern giant petrels breeding in Antarctica and southern Patagonia." Marine Biology 159(6): 1317-1326.	2012	BAT	NA	NA	NA	NA	NA	NA	Southern Ocean	Biology	Seabirds	Examined the isotopic signatures of adult body feathers from southern giant petrels Macronectes giganteus collected at two breeding colonies in Antarctica (Potter Peninsula and Cape Geddes)
Pond, D. W., et al. (2012). "Wax ester composition influences the diapause patterns in the copepod Calanoides acutus." Deep-Sea Research Part Ii-Topical Studies in Oceanography 59: 93-104.	2012	SGSSI	BAT	NA	NA	NA	NA	NA	Southern Ocean	Biology	Plankton	compare the abundance, depth distribution, lipid content and wax ester composition of individual CV Calanoides acutus collected from the Southern Ocean at depth horizons ranging from the surface to 1000 m
Pistorius, P. A., et al. (2012). "Population development and historical occurrence of king penguins at the Falkland Islands." Antarctic Science 24(5): 435-440.	2012	Falkland Islands	NA	NA	NA	NA	NA	NA	South Atlantic	Biology	Seabirds	Population of king penguins
Pfingstl, T. and R. Schuster (2012). "First record of the littoral genus Alismobates (Acari: Oribatida) from the Atlantic ocean, with a redefinition of the family Fortuyniidae based on adult and juvenile morphology." Zootaxa(3301): 1-33.	2012	Bermuda	NA	NA	NA	NA	NA	NA	North-western Atlantic	Biology	Other	Alismobates inexpectatus sp.n., found on rocky shores of the archipelago of Bermuda is described from larva to adult
Parsons, R. J., et al. (2012). "Ocean time-series reveals recurring seasonal patterns of virioplankton dynamics in the northwestern Sargasso Sea." Isme Journal 6(2): 273-284.	2012	Bermuda	NA	NA	NA	NA	NA	NA	North-western Atlantic	Biology	Microbial community	Temporal and vertical patterns of virioplankton abundance at BATS
Otley, H., et al. (2012). "Beaked whale strandings on the Falkland Islands and South Georgia, South Atlantic Ocean, between 1866 and 2008." Journal of the Marine Biological Association of the United Kingdom 92(8): 1851-1864.	2012	Falkland Islands	SGSSI	NA	NA	NA	NA	NA	South Atlantic, Southern Ocean	Biology	Mammalia	Records of beaked whales stranded in the Falkland Islands and at South Georgia
Otley, H. (2012). "The composition of the cetacean community in the Falkland (Malvinas) Islands, southwest South Atlantic Ocean." Revista De Biologia Marina Y Oceanografia 47(3): 537-551.	2012	Falkland Islands	NA	NA	NA	NA	NA	NA	South Atlantic	Ecology	Mammalia	Documents cetacean community based on stranding record for the period 1866 to September 2012
Obura, D. (2012). "The diversity and biogeography of Western Indian Ocean reef-building corals." Plos One 7(9).	2012	BIOT	NA	NA	NA	NA	NA	NA	Indian Ocean	Biogeography	Anthozoa	Assesses the biogeographic classification of the Western Indian Ocean (WIO) on the basis of the species diversity and distribution of reef-building corals
Nielsdottir, M. C., et al. (2012). "Seasonal and spatial dynamics of iron availability in the Scotia Sea." Marine Chemistry 130: 62-72.	2012	BAT	SGSSI	NA	NA	NA	NA	NA	Southern Ocean	Biology	Plankton	Seasonal variations in phytoplankton biomass and iron availability in the Scotia Sea over both austral spring and summer seasons
Levine, N. M., et al. (2012). "Environmental, biochemical and genetic drivers of DMSP degradation and DMS production in the Sargasso Sea." Environmental Microbiology 14(5): 1210-1223.	2012	Bermuda	NA	NA	NA	NA	NA	NA	North-western Atlantic	Biogeochemistry	Microbial community	Investigated mechanisms driving dimethylsulfide production and dimethylsulfoniopropionate degradation
La Mesa, M. and J. T. Eastman (2012). "First data on age and sexual maturity of the Tristan klipfish, Bovichtus diacanthus (Bovichtidae) from Tristan da Cunha, South Atlantic." Antarctic Science 24(2): 115-120.	2012	Tristan	NA	NA	NA	NA	NA	NA	South Atlantic	Biology	Fish	Age and sexual maturity of the Tristan klipfish, Bovichtus diacanthus
La Mesa, M., et al. (2012). "Age and growth of the Antarctic dragonfish Parachaenichthys charcoti (Pisces, Bathydraconidae) from the southern Scotia Arc." Polar Biology 35(10): 1545-1553.	2012	SGSSI	BAT	NA	NA	NA	NA	NA	Southern Ocean	Biology	Fish	Age and growth of Parachaenichthys charcoti
Korb, R. E., et al. (2012). "Regional and seasonal differences in microplankton biomass, productivity, and structure across the Scotia Sea: Implications for the export of biogenic carbon." Deep-Sea Research Part Ii-Topical Studies in Oceanography 59: 67-77.	2012	SGSSI	BAT	NA	NA	NA	NA	NA	Southern Ocean	Biogeochemistry	Plankton	Phytoplankton productivity linked to carbon export
Jones, R., et al. (2012). "Spatial and temporal patterns of coral black band disease in relation to a major sewage outfall." Marine Ecology Progress Series 462: 79-+.	2012	Bermuda	NA	NA	NA	NA	NA	NA	North-western Atlantic	Management	Anthozoa	Spatial and temporal patterns of coral black band disease prevalence documented along a sewage gradient
Jones, E. M., et al. (2012). "Dynamic seasonal cycling of inorganic carbon downstream of South Georgia, Southern Ocean." Deep-Sea Research Part Ii-Topical Studies in Oceanography 59: 25-35.	2012	SGSSI	NA	NA	NA	NA	NA	NA	Southern Ocean	Biogeochemistry	Plankton	Influence of blooms on carbon export
Hoeksema, B. W. (2012). "Extreme morphological plasticity enables a free mode of life in Favia gravida at Ascension Island (South Atlantic)." Marine Biodiversity 42(2): 289-295.	2012	Ascension	NA	NA	NA	NA	NA	NA	South Atlantic	Biology	Anthozoa	Description of free-living corals of Favia gravida from an intertidal rock pool
Hmelo, L. R., et al. (2012). "Characterization of bacterial epibionts on the cyanobacterium Trichodesmium." Aquatic Microbial Ecology 67(1): 1-U119.	2012	Bermuda	NA	NA	NA	NA	NA	NA	North-western Atlantic	Ecology	Microbial community	Phylogenetically classify Trichodesmium communities
Hinz, D. J., et al. (2012). "Responses of microplankton community structure to iron addition in the Scotia Sea." Deep-Sea Research Part Ii-Topical Studies in Oceanography 59: 36-46.	2012	SGSSI	BAT	NA	NA	NA	NA	NA	Southern Ocean	Biology	Plankton	Phytoplankton response to iron addition
Hill, S. L., et al. (2012). "A foodweb model to explore uncertainties in the South Georgia shelf pelagic ecosystem." Deep-Sea Research Part Ii-Topical Studies in Oceanography 59: 237-252.	2012	SGSSI	NA	NA	NA	NA	NA	NA	Southern Ocean	Ecology	Comprehensive	Pelagic food web model to investigate how changes to zooplankton might impact vertebrate predators
Heppell, S. A., et al. (2012). "Documenting recovery of a spawning aggregation through size frequency analysis from underwater laser calipers measurements." Biological Conservation 155: 119-127.	2012	Cayman Islands	NA	NA	NA	NA	NA	NA	Caribbean	Biology	Fish	Nassau grouper spawning monitoring
Hedd, A., et al. (2012). "Trans-equatorial migration and habitat use by sooty shearwaters Puffinus griseus from the South Atlantic during the nonbreeding season." Marine Ecology Progress Series 449: 277-290.	2012	Falkland Islands	NA	NA	NA	NA	NA	NA	South Atlantic	Biogeography	Seabirds	Trans-equatorial migration, activity patterns and habitat use of sooty shearwaters Puffinus griseus during non breeding seasons
Groeneveld, J. C., et al. (2012). "High connectivity and lack of mtDNA differentiation among two previously recognized spiny lobster species in the southern Atlantic and Indian Oceans." Marine Biology Research 8(8): 764-770.	2012	Tristan	NA	NA	NA	NA	NA	NA	South Atlantic	Taxonomy	Crustacea	Genetic population structure and connectivity of adult spiny lobsters Jasus paulensis and J. tristani from Indian and Atlantic Oceans
Goodwin, C., et al. (2012). "Sponge biodiversity of South Georgia island with descriptions of fifteen new species." Zootaxa(3542): 1-48.	2012	SGSSI	NA	NA	NA	NA	NA	NA	Southern Ocean	Taxonomy	Porifera	Description of sponge biodiversity with new species
Goodbody-Gringley, G., et al. (2012). "Population structure and connectivity in the Atlantic scleractinian coral Montastraea cavernosa (Linnaeus, 1767)." Marine Ecology-an Evolutionary Perspective 33(1): 32-48.	2012	Bermuda	NA	NA	NA	NA	NA	NA	North-western Atlantic	Genetics	Anthozoa	Examined genetic connectivity and morphological variation of the broadcast spawning coral Montastraea cavernosa (L., 1767) among five locations in the Caribbean and Western Atlantic.
Frazer, T. K., et al. (2012). "Coping with the lionfish invasion: can targeted removals yield beneficial effects?" Reviews in Fisheries Science 20(4): 185-191.	2012	Cayman Islands	NA	NA	NA	NA	NA	NA	Caribbean	Management	Fish	Effect of removals on lionfish size distribution, and stomach content analysis of different sized lionfish
Fielding, S., et al. (2012). "Acoustic determination of the distribution of fish and krill across the Scotia Sea in spring 2006, summer 2008 and autumn 2009." Deep-Sea Research Part Ii-Topical Studies in Oceanography 59: 173-188.	2012	BAT	SGSSI	NA	NA	NA	NA	NA	Southern Ocean	Biology	Fish, zooplankton	Multifrequency acoustic backscatter data used to identify mesopelagic fish and krill schools
Downey, R. V., et al. (2012). "Diversity and distribution patterns in High Southern latitude sponges." Plos One 7(7).	2012	BAT	SGSSI	Falkland Islands	NA	NA	NA	NA	Southern Ocean, South Atlantic	Biogeography	Porifera	Database of sponge records across Southern Ocean. Presents species richness maps.
Diaz, A., et al. (2012). "Restricted geographic distribution and low genetic diversity of the brooding sea urchin Abatus agassizii (Spatangoidea: Schizasteridae) in the South Shetland Islands: A bridgehead population before the spread to the northern Antarctic Peninsula?" Revista Chilena De Historia Natural 85(4): 457-468.	2012	SGSSI	NA	NA	NA	NA	NA	NA	Southern Ocean	Genetics	Echinodermata	Evaluates whether A. agassizii may have survived the glaciations in its narrow bathymetric range in the South Shetland Islands, or whether this population corresponds to a newcomer that re-colonized the area despite its low dispersal capacities
de Dinechin, M., et al. (2012). "The biogeography of Gentoo Penguins (Pygoscelis papua)." Canadian Journal of Zoology-Revue Canadienne De Zoologie 90(3): 352-360.	2012	Falkland Islands	BAT	NA	NA	NA	NA	NA	South Atlantic, Southern Ocean	Genetics	Seabirds	Genetic diversity between gentoo penguins
Connelly, D. P., et al. (2012). "Hydrothermal vent fields and chemosynthetic biota on the world's deepest seafloor spreading centre." Nature Communications 3.	2012	Cayman Islands	NA	NA	NA	NA	NA	NA	Caribbean	Biology	Crustacea	Faunal assemblage of Von Damm vents
Claydon, J. A. B., et al. (2012). "Progression of invasive lionfish in seagrass, mangrove and reef habitats." Marine Ecology Progress Series 448: 119-129.	2012	TCI	NA	NA	NA	NA	NA	NA	Caribbean	Biology	Fish	Reconstructs lionfish invasion around TCI
Ceia, F. R., et al. (2012). "Short- and long-term consistency in the foraging niche of wandering albatrosses." Marine Biology 159(7): 1581-1591.	2012	SGSSI	NA	NA	NA	NA	NA	NA	Southern Ocean	Ecology	Seabirds	Short- and long-term consistency in the foraging niche in terms of habitat use, trophic level and, by inference, prey selection.
Baylis, A. M. M., et al. (2012). "Climate as a driver of population variability in breeding Gentoo Penguins Pygoscelis papua at the Falkland Islands." Ibis 154(1): 30-41.	2012	Falkland Islands	NA	NA	NA	NA	NA	NA	South Atlantic	Biology	Seabirds	Examine 21 years of Gentoo Penguin breeding surveys from the Falkland Islands and assess whether inter-annual variability in the number of breeding pairs were correlated with proxies of environmental variability
Baldwin, C. C. and L. A. Weigt (2012). "A new species of soapfish (Teleostei: Serranidae: Rypticus), with redescription of R. subbifrenatus and comments on the use of DNA barcoding in systematic studies." Copeia(1): 23-36.	2012	Bermuda	NA	NA	NA	NA	NA	NA	North-western Atlantic	Taxonomy	Fish	Description of new species of soapfish
Ashford, J. R., et al. (2012). "Testing early life connectivity supplying a marine fishery around the Falkland Islands." Fisheries Research 121: 144-152.	2012	Falkland Islands	NA	NA	NA	NA	NA	NA	South Atlantic	Management	Fish	Model concerning advective supply of Patagonian toothfish (Dissostichus eleginoides) to a trawl fishery around the Falkland Islands, tested using otoliths
Arkhipkin, A., et al. (2012). "Dining hall at sea: feeding migrations of nektonic predators to the eastern Patagonian Shelf." Journal of Fish Biology 81(2): 882-902.	2012	Falkland Islands	NA	NA	NA	NA	NA	NA	South Atlantic	Ecology	Fish, mollusca	Distributions and seasonal changes in biomass of the most abundant nektonic fish and squid on the Patagonian Shelf and slope analysed to reveal seasonal migrations
Arkhipkin, A., et al. (2012). "Skate assemblage on the eastern Patagonian Shelf and Slope: structure, diversity and abundance." Journal of Fish Biology 80(5): 1704-1726.	2012	Falkland Islands	NA	NA	NA	NA	NA	NA	South Atlantic	Biogeography	Fish	Spatial and seasonal distributions of skates
Archer, S. K., et al. (2012). "Patterns of color phase indicate spawn timing at a Nassau grouper Epinephelus striatus spawning aggregation." Current Zoology 58(1): 73-83.	2012	Cayman Islands	NA	NA	NA	NA	NA	NA	Caribbean	Biology	Fish	Colour of Nasau grouper during spawning
Anker, A. and S. De Grave (2012). "Description of Alpheus cedrici sp n., a strikingly coloured snapping shrimp (Crustacea, Decapoda, Alpheidae) from Ascension Island, central Atlantic Ocean." Zookeys(183): 1-15.	2012	Ascension	NA	NA	NA	NA	NA	NA	South Atlantic	Taxonomy	Crustacea	Description of snapping shrim Alpheus cedrici
Ajemian, M. J., et al. (2012). "Estimating the potential impacts of large mesopredators on benthic resources: integrative assessment of Spotted Eagle Ray foraging ecology in Bermuda." Plos One 7(7).	2012	Bermuda	NA	NA	NA	NA	NA	NA	North-western Atlantic	Ecology	Fish	Spotted eagle ray Aetobatus narinari residency, distribution, predatory role
D'Acoz, C. D. and C. Havermans (2012). "Two new Pseudorchomene species from the Southern Ocean, with phylogenetic remarks on the genus and related species (Crustacea: Amphipoda: Lysianassoidea: Lysianassidae: Tryphosinae)." Zootaxa(3310): 1-50.	2012	Falkland Islands	NA	NA	NA	NA	NA	NA	South Atlantic	Taxonomy	Crustacea	Two new lysianassoid amphipods of the genus Pseudorchomene Schellenberg, 1926 from the Southern Ocean are described:
Ahyong, S. T., et al. (2012). Thymops takedai, a new species of deepwater lobster from the Southwest Atlantic Ocean with additional records of 'thymopine' lobsters (Decapoda, Nephropidae). Crustaceana Monographs. 17: 49-61.	2012	SGSSI	NA	NA	NA	NA	NA	NA	Southern Ocean	Taxonomy	Crustacea	Description of a new species of deep-water clawed lobster
Xavier, J. C., et al. (2013). "Seasonal changes in the diet and feeding behaviour of a top predator indicate a flexible response to deteriorating oceanographic conditions." Marine Biology 160(7): 1597-1606.	2013	SGSSI	NA	NA	NA	NA	NA	NA	Southern Ocean	Ecology	Seabirds	Diet of grey-headed albatross
Weber, N., et al. (2013). "Telemetry as a tool for improving estimates of marine turtle abundance." Biological Conservation 167: 90-96.	2013	Ascension	NA	NA	NA	NA	NA	NA	South Atlantic	Biology	Chelonioidea	Population size estimate of green turtles
Vergin, K. L., et al. (2013). "Spatiotemporal distributions of rare bacterioplankton populations indicate adaptive strategies in the oligotrophic ocean." Aquatic Microbial Ecology 71(1): 1-U129.	2013	Bermuda	NA	NA	NA	NA	NA	NA	North-western Atlantic	Biology	Microbial community	Distribution of plankton at BATS
Vergin, K. L., et al. (2013). "High-resolution SAR11 ecotype dynamics at the Bermuda Atlantic Time-series Study site by phylogenetic placement of pyrosequences." Isme Journal 7(7): 1322-1332.	2013	Bermuda	NA	NA	NA	NA	NA	NA	North-western Atlantic	Genetics	Microbial community	Evolutionary diversification of bacterioplankton
Taylor, M. L., et al. (2013). "Using fisheries by-catch data to predict octocoral habitat suitability around South Georgia." Journal of Biogeography 40(9): 1688-1701.	2013	SGSSI	NA	NA	NA	NA	NA	NA	Southern Ocean	Management	Anthozoa	Habitat suitability mapping for octocorals using fisheries bycatch data
Tavares, S., et al. (2013). "Influence of age, sex and breeding status on mercury accumulation patterns in the wandering albatross Diomedea exulans." Environmental Pollution 181: 315-320.	2013	SGSSI	NA	NA	NA	NA	NA	NA	Southern Ocean	Threat	Seabirds	Mercury accumulation in wandering albatross
Tancell, C., et al. (2013). "Comparison of methods for determining key marine areas from tracking data." Marine Biology 160(1): 15-26.	2013	SGSSI	NA	NA	NA	NA	NA	NA	Southern Ocean	Management	Seabirds	Compared methods for identifying important areas based on previously collected tracking data
Stringell, T. B., et al. (2013). "Marine turtle harvest in a mixed small-scale fishery: evidence for revised management measures." Ocean & Coastal Management 82: 34-42.	2013	TCI	NA	NA	NA	NA	NA	NA	Caribbean	Management	Chelonioidea	Turtle harvest and fishery management
Sepúlveda, M., et al. (2013). "Testing Bergmann's rule and the Rosenzweig hypothesis with craniometric studies of the South American sea lion." Oecologia 171(4): 809-817.	2013	Falkland Islands	NA	NA	NA	NA	NA	NA	South Atlantic	Biology	Mammalia	Geographical variation of skull size of South American seals
Saunders, R. A., et al. (2013). "School characteristics of mesopelagic fish at South Georgia." Deep-Sea Research Part I: Oceanographic Research Papers 81: 62-77.	2013	SGSSI	NA	NA	NA	NA	NA	NA	Southern Ocean	Biology	Fish	Myctophid school characteristics
Roterman, C. N., et al. (2013). "Development of polymorphic microsatellite loci for three species of vent-endemic megafauna from deep-sea hydrothermal vents in the Scotia Sea, Southern Ocean." Conservation Genetics Resources 5(3): 835-839.	2013	SGSSI	NA	NA	NA	NA	NA	NA	Southern Ocean	Genetics	Crustacea	Three new species genetic markers from hydrothermal vent on East Scotia ridge
Richardson, P. B., et al. (2013). "Leatherback turtle conservation in the Caribbean UK overseas territories: act local, think global?" Marine Policy 38: 483-490.	2013	Anguilla	BVI	NA	NA	NA	NA	NA	Caribbean	Management	Chelonioidea	Post nesting movements of leatherbacks in Caribbean Ots
Ratcliffe, N., et al. (2013). "The roles of sex, mass and individual specialisation in partitioning foraging-depth niches of a pursuit-diving predator." Plos One 8(10).	2013	SGSSI	NA	NA	NA	NA	NA	NA	Southern Ocean	Biology	Seabirds	Intra-specific foraging niche partitioning dive depths South Georgian shag
Quillfeldt, P., et al. (2013). "Year-round distribution suggests spatial segregation of two small petrel species in the South Atlantic." Journal of Biogeography 40(3): 430-441.	2013	Falkland Islands	SGSSI	NA	NA	NA	NA	NA	South Atlantic, Southern Ocean	Distribution	Seabirds	Thin billed prion from Falkland Islands, Antarctic prion from SGSSI
Prouty, N. G., et al. (2013). "Environmental assessment of metal exposure to corals living in Castle Harbour, Bermuda." Marine Chemistry 154: 55-66.	2013	Bermuda	SGSSI	NA	NA	NA	NA	NA	Southern Ocean, North-western Atlantic	Threat	Anthozoa	Documents evidence for environmental impact of leachate from landfill by quantitatively demonstrating elevated metal uptake over the last 30 years in corals growing in Castle Harbour
Price, A. R. G., et al. (2013). "Negligible recovery in Chagos holothurians (sea cucumbers)." Aquatic Conservation-Marine and Freshwater Ecosystems 23(6): 811-819.	2013	BIOT	NA	NA	NA	NA	NA	NA	Indian Ocean	Biology	Echinodermata	Census of Chagos sea cucumbers
Pratchett, M. S., et al. (2013). "Specialist corallivores dominate butterflyfish assemblages in coral-dominated reef habitats." Journal of Fish Biology 82(4): 1177-1191.	2013	BIOT	NA	NA	NA	NA	NA	NA	Indian Ocean	Ecology	Fish	Dietary habits and functional composition of butterflyfishes
Pfingstl, T. (2013). "Habitat use, feeding and reproductive traits of rocky-shore intertidal mits from Bermuda (Oribatida: Fortuyniidae and Selenoribatidae)." Acarologia 53(4): 369-382.	2013	Bermuda	NA	NA	NA	NA	NA	NA	North-western Atlantic	Ecology	Other	Mites in bermuda
Orcutt, K. M., et al. (2013). "Intense ectoenzyme activities associated with Trichodesmium colonies in the Sargasso Sea." Marine Ecology Progress Series 478: 101-113.	2013	Bermuda	NA	NA	NA	NA	NA	NA	North-western Atlantic	Biogeochemistry	Microbial community	Ectoenzyme activities of microbial community
Nye, V., et al. (2013). "A new species of Lebbeus (Crustacea: Decapoda: Caridea: Hippolytidae) from the von Damm Vent Field, Caribbean Sea." Journal of the Marine Biological Association of the United Kingdom 93(3): 741-751.	2013	Cayman Islands	NA	NA	NA	NA	NA	NA	Caribbean	Taxonomy	Crustacea	New species description from vent field
Nye, V., et al. (2013). "Iheyaspira bathycodon new species (Vetigastropoda: Trochoidea: Turbinidae: Skeneinae) from the Von Damm Vent Field, Mid-Cayman Spreading Centre, Caribbean." Journal of the Marine Biological Association of the United Kingdom 93(4): 1017-1024.	2013	Cayman Islands	NA	NA	NA	NA	NA	NA	Caribbean	Taxonomy	Crustacea	New species description from vent field
Murphy, E. J., et al. (2013). "Comparison of the structure and function of Southern Ocean regional ecosystems: the Antarctic Peninsula and South Georgia." Journal of Marine Systems 109: 22-42.	2013	BAT	SGSSI	NA	NA	NA	NA	NA	Southern Ocean	Ecology	Comprehensive	Review of SGSSI & BAT
Muelbert, M. M. C., et al. (2013). "Foraging habitats of southern elephant seals, Mirounga leonina, from the Northern Antarctic Peninsula." Deep-Sea Research Part Ii-Topical Studies in Oceanography 88-89: 47-60.	2013	BAT	SGSSI	NA	NA	NA	NA	NA	Southern Ocean	Distribution	Mammalia	Foraging habitat of southern elephant seals
Masello, J. F., et al. (2013). "Distribution patterns predict individual specialization in the diet of Dolphin Gulls." Plos One 8(7).	2013	Falkland Islands	NA	NA	NA	NA	NA	NA	South Atlantic	Ecology	Seabirds	Dolphin gulls foraging strategies/diet
Martin-Ledo, R., et al. (2013). "A new brooding species of brittle star (Echinodermata: Ophiuroidea) from Antarctic waters." Polar Biology 36(1): 115-126.	2013	SGSSI	NA	NA	NA	NA	NA	NA	Southern Ocean	Taxonomy	Echinodermata	New species described
Marston, M. F., et al. (2013). "Marine cyanophages exhibit local and regional biogeography." Environmental Microbiology 15(5): 1452-1463.	2013	Bermuda	NA	NA	NA	NA	NA	NA	North-western Atlantic	Biogeography	Microbial community	Cyanophage community composition
Manuel, S. A., et al. (2013). "Tropical species at the northern limit of their range: composition and distribution in Bermuda's benthic habitats in relation to depth and light availability." Marine Environmental Research 89: 63-75.	2013	Bermuda	NA	NA	NA	NA	NA	NA	North-western Atlantic	Biogeography	Macroalgae, anthozoa	distribution, condition and environmental characteristics of benthic communities
Manfrino, C., et al. (2013). "A positive trajectory for corals at Little Cayman Island." Plos One 8(10).	2013	Cayman Islands	NA	NA	NA	NA	NA	NA	Caribbean	Ecology	Anthozoa	Changes in coral assemblages inside vs outside MPA
MacKenzie, K., et al. (2013). "Parasites of hoki, Macruronus magellanicus, in the Southwest Atlantic and Southeast Pacific Oceans, with an assessment of their potential value as biological tags." Fisheries Research 145: 1-5.	2013	Falkland Islands	NA	NA	NA	NA	NA	NA	South Atlantic	Biology	Other	Parasite fauna of hoki for use in stock identification
Ludynia, K., et al. (2013). "Sexual segregation in rockhopper penguins during incubation." Animal Behaviour 85(1): 255-267.	2013	Falkland Islands	NA	NA	NA	NA	NA	NA	South Atlantic	Biology	Seabirds	examined sex differences in the foraging behaviour of southern rockhopper penguins during the incubation period
Legua, J., et al. (2013). "Otolith shape analysis as a tool for stock identification of the southern blue whiting, Micromesistius australis." Latin American Journal of Aquatic Research 41(3): 479-489.	2013	Falkland Islands	NA	NA	NA	NA	NA	NA	South Atlantic	Biology	Fish	Using otoliths for stock identification
Laptikhovsky, V., et al. (2013). "A Pacific grenadier Coryphaenoides acrolepis in the south-west Atlantic and environmental changes in the Falkland deep seas." Marine Biodiversity Records 6.	2013	Falkland Islands	NA	NA	NA	NA	NA	NA	South Atlantic	Biogeography	Fish	Reasons for potential range expansion of the Pacific grenadier
La Mesa, M., et al. (2013). "Early ontogeny of the mackerel icefish, Champsocephalus gunnari, in the southern Scotia Arc." Polar Biology 36(6): 797-805.	2013	SGSSI	NA	NA	NA	NA	NA	NA	Southern Ocean	Biology	Fish	Ontogeny of larval icefish
Kalavati, C., et al. (2013). "Two new species of myxosporean parasites (Myxosporea: Bivalvulida) from gall bladders of Macruronus magellanicus lönnberg, 1907 (Teleostei: Merlucciidae)." Zootaxa 3647(4): 541-554.	2013	Falkland Islands	NA	NA	NA	NA	NA	NA	South Atlantic	Taxonomy	Other	Parasite fauna of hoki including two new species identified
Hoffman, J. I., et al. (2013). "Transcriptome of the dead: characterisation of immune genes and marker development from necropsy samples in a free-ranging marine mammal." Bmc Genomics 14.	2013	SGSSI	NA	NA	NA	NA	NA	NA	Southern Ocean	Genetics	Mammalia	cDNA sequenced from 9 dead adult male Antarctic fur seals
Hill, S. L., et al. (2013). "Potential climate change effects on the habitat of Antarctic Krill in the Weddell Quadrant of the Southern Ocean." Plos One 8(8).	2013	SGSSI	BAT	NA	NA	NA	NA	NA	Southern Ocean	Biology	Plankton	Assessed the potential influence of this projected warming on Antarctic krill habitat with a statistical model that links growth to temperature and chlorophyll concentration
Henderson, A. C. and M. Nash (2013). "Confirmation of recent hawksbill turtle Eretmochelys imbricata nesting activity on South Caicos, Turks and Caicos Islands." Marine Biodiversity Records 6.	2013	TCI	NA	NA	NA	NA	NA	NA	Caribbean	Biogeography	Chelonioidea	Observation of hawksbill nest hatching
Hawkes, L. A., et al. (2013). "Estimating sex ratios in Caribbean hawksbill turtles: testosterone levels and climate effects." Aquatic Biology 18(1): 9-19.	2013	BVI	NA	NA	NA	NA	NA	NA	Caribbean	Biology	Chelonioidea	Analysed sex ratio of juvenile turtles
Graham, N. A. J. and T. R. McClanahan (2013). "The last call for marine wilderness?" Bioscience 63(5): 397-402.	2013	BIOT	NA	NA	NA	NA	NA	NA	Indian Ocean	Ecology	Fish	Compare Chagos reef fish communities with other MPAs in Indian Ocean
Glass, J. P. and P. G. Ryan (2013). "Reduced seabird night strikes and mortality in the Tristan rock lobster fishery." African Journal of Marine Science 35(4): 589-592.	2013	Tristan	NA	NA	NA	NA	NA	NA	South Atlantic	Management	Seabirds	Interaction between seabirds and night lights
Fraser, C. I. and J. M. Waters (2013). "Algal parasite Herpodiscus durvillaeae (Phaeophyceae: Sphacelariales) inferred to have traversed the Pacific Ocean with its buoyant host." Journal of Phycology 49(1): 202-206.	2013	Falkland Islands	NA	NA	NA	NA	NA	NA	South Atlantic	Biogeography	Other	First record of parasite species
Dehnhard, N., et al. (2013). "Survival of rockhopper penguins in times of global climate change." Aquatic Conservation-Marine and Freshwater Ecosystems 23(5): 777-789.	2013	Falkland Islands	NA	NA	NA	NA	NA	NA	South Atlantic	Biology	Seabirds	Adult survival rates of rackhopper penguins
Dehnhard, N., et al. (2013). "Good days, bad days: wind as a driver of foraging success in a flightless seabird, the Southern Rockhopper Penguin." Plos One 8(11).	2013	Falkland Islands	NA	NA	NA	NA	NA	NA	South Atlantic	Biology	Seabirds	Daily foraging mass gain southern Rockhopper penguin
Corcoran, M. J., et al. (2013). "Supplemental feeding for ecotourism reverses diel activity and alters movement patterns and spatial distribution of the Southern Stingray, Dasyatis americana." Plos One 8(3).	2013	Cayman Islands	NA	NA	NA	NA	NA	NA	Caribbean	Management	Fish	Movement behavior and spatial distribution of stingrays in response to supplemental feeding through tourism
Catry, P., et al. (2013). "Predicting the distribution of a threatened albatross: The importance of competition, fisheries and annual variability." Progress in Oceanography 110: 1-10.	2013	Falkland Islands	NA	NA	NA	NA	NA	NA	South Atlantic	Biogeography	Seabirds	Tracked 99 black-browed albatross to create a predictive model of distribution
Casey, J. R., et al. (2013). "Changes in partitioning of carbon amongst photosynthetic pico- and nano-plankton groups in the Sargasso Sea in response to changes in the North Atlantic Oscillation." Deep-Sea Research Part Ii-Topical Studies in Oceanography 93: 58-70.	2013	Bermuda	NA	NA	NA	NA	NA	NA	North-western Atlantic	Biogeochemistry	Plankton	Seasonality and interannual dynamics of Picophytoplankton
Camp, E. F., et al. (2013). "Microhabitat associations of late juvenile Nassau grouper (Epinephelus striatus) off Little Cayman, BWI." Bulletin of Marine Science 89(2): 571-581.	2013	Cayman Islands	NA	NA	NA	NA	NA	NA	Caribbean	Biology	Fish	documented microhabitat associations for late juvenile Nassau grouper in shallow, nearshore lagoons off Little Cayman Island.
Cairns, S. D. and V. Polonio (2013). "New records of deep-water Scleractinia off Argentina and the Falkland Islands." Zootaxa 3691(1): 58-86.	2013	Falkland Islands	NA	NA	NA	NA	NA	NA	South Atlantic	Taxonomy	Anthozoa	Documents scleractiniam corals including new species
Buckeridge, J. S., et al. (2013). "Vulcanolepas scotiaensis sp nov., a new deep-sea scalpelliform barnacle (Eolepadidae: Neolepadinae) from hydrothermal vents in the Scotia Sea, Antarctica." Zootaxa 3745(5): 551-568.	2013	SGSSI	NA	NA	NA	NA	NA	NA	Southern Ocean	Taxonomy	Crustacea	Description of a new deep-sea stalked barnacle
Brown, J., et al. (2013). "Investigating the movements and behaviour of Patagonian toothfish (Dissostichus eleginoides Smitt, 1898) around the Falkland Islands using satellite linked archival tags." Journal of Experimental Marine Biology and Ecology 443: 65-74.	2013	Falkland Islands	NA	NA	NA	NA	NA	NA	South Atlantic	Biogeography	Fish	Movement of patagonian toothfish around the Falkland Islands
Boschen, R. E., et al. (2013). "Distribution, population structure, reproduction and diet of Ophiolimna antarctica (Lyman, 1879) from Kemp Caldera in the Southern Ocean." Deep-Sea Research Part Ii-Topical Studies in Oceanography 92: 27-35.	2013	SGSSI	NA	NA	NA	NA	NA	NA	Southern Ocean	Biology	Echinodermata	Description of population of Ophiolimna antarctica
Borrione, I. and R. Schlitzer (2013). "Distribution and recurrence of phytoplankton blooms around South Georgia, Southern Ocean." Biogeosciences 10(1): 217-231.	2013	SGSSI	NA	NA	NA	NA	NA	NA	Southern Ocean	Biology	Plankton	Distribution and seasonality of phytoplankton blooms
Booth, J. M. and C. D. McQuaid (2013). "Northern rockhopper penguins prioritise future reproduction over chick provisioning." Marine Ecology Progress Series 486: 289-304.	2013	Tristan	NA	NA	NA	NA	NA	NA	South Atlantic	Biology	Seabirds	Chick feeding patterns by Northern rockhopper penguins
Bonin, C. A., et al. (2013). "Unexpected genetic differentiation between recently recolonized populations of a long-lived and highly vagile marine mammal." Ecology and Evolution 3(11): 3701-3712.	2013	SGSSI	NA	NA	NA	NA	NA	NA	Southern Ocean	Genetics	Mammalia	Antarctic fur seal genetic diversity between populations
Bogdanowicz, W., et al. (2013). "Genetic diversity in a moulting colony of southern elephant seals in comparison with breeding colonies." Marine Ecology Progress Series 478: 287-300.	2013	SGSSI	NA	NA	NA	NA	NA	NA	Southern Ocean	Genetics	Mammalia	genetic diversity of the elephant seal moulting colony from King George Island compared with breeding colonies
Belchier, M. and J. Lawson (2013). "An analysis of temporal variability in abundance, diversity and growth rates within the coastal ichthyoplankton assemblage of South Georgia (sub-Antarctic)." Polar Biology 36(7): 969-983.	2013	SGSSI	NA	NA	NA	NA	NA	NA	Southern Ocean	Biology	Fish	Temporal distribution of fish eggs and larvae
Baylis, A. M. M., et al. (2013). "Increasing trend in the number of Southern Rockhopper Penguins (Eudyptes c. chrysocome) breeding at the Falkland Islands." Polar Biology 36(7): 1007-1018.	2013	Falkland Islands	NA	NA	NA	NA	NA	NA	South Atlantic	Biology	Seabirds	Archipelago wide census of breeding southern rockhopper pengins
Bahuguna, A., et al. (2013). "Spatial inventory and ecological status of coral reefs of the Central Indian Ocean using Resourcesat-1." Indian Journal of Geo-Marine Sciences 42(6): 684-696.	2013	BIOT	NA	NA	NA	NA	NA	NA	Indian Ocean	Biogeography	Anthozoa	Distribution and assessment of coral reef health using satellit imagery
Arkhipkin, A. and D. Davidson (2013). "Iridophores and sexual dimorphism in the squid doryteuthis gahi (loliginidae) from the Southwestern Atlantic." Journal of Molluscan Studies 79(4): 296-301.	2013	Falkland Islands	NA	NA	NA	NA	NA	NA	South Atlantic	Biology	Cephalopoda	Iridophores of squid
Arkhipkin, A., et al. (2013). "Close cooperation between science, management and industry benefits sustainable exploitation of the Falkland Islands squid fisheries." Journal of Fish Biology 83(4): 905-920.	2013	Falkland Islands	NA	NA	NA	NA	NA	NA	South Atlantic	Management	Cephalopoda	Description of squid fisheries
Amon, D. J., et al. (2013). "The discovery of a natural whale fall in the Antarctic deep sea." Deep-Sea Research Part II: Topical Studies in Oceanography 92: 87-96.	2013	SGSSI	NA	NA	NA	NA	NA	NA	Southern Ocean	Biology	Comprehensive	Description of fauna on observed whale fall
Amacher, J., et al. (2013). "DNA-based molecular fingerprinting of eukaryotic protists and cyanobacteria contributing to sinking particle flux at the Bermuda Atlantic time-series study." Deep-Sea Research Part II: Topical Studies in Oceanography 93: 71-83.	2013	Bermuda	NA	NA	NA	NA	NA	NA	North-western Atlantic	Biogeochemistry	Microbial community	Examined the protist and cyanobacterial communities in the euphotic zone (0–120m)
Waluda, C. M. and I. J. Staniland (2013). "Entanglement of Antarctic fur seals at Bird Island, South Georgia." Marine Pollution Bulletin 74(1): 244-252.	2013	SGSSI	BAT	NA	NA	NA	NA	NA	Southern Ocean	Threat	Mammalia	Observation of Antarctic fur seals entangled in marine debris
Wirtz, P., et al. (2017). "The fishes of Ascension Island, central Atlantic Ocean-new records and an annotated checklist." Journal of the Marine Biological Association of the United Kingdom 97(4): 783-798.	2014	Ascension	NA	NA	NA	NA	NA	NA	South Atlantic	Biodiversity stocktake	Fish	Fish species checklist
Tsiamis, K., et al. (2014). "Marine benthic algal flora of Ascension Island, South Atlantic." Journal of the Marine Biological Association of the United Kingdom 97(4): 681-688.	2014	Ascension	NA	NA	NA	NA	NA	NA	South Atlantic	Biodiversity stocktake	Macroalgae	Benthic macroalgae species checklist
Stampar, S. N. and A. C. Morandini (2014). "Occurrence of Isarachnanthus (Cnidaria: Anthozoa: Ceriantharia) at Ascension Island: A test of hypothesis." Journal of the Marine Biological Association of the United Kingdom 97(4): 689-693.	2014	Ascension	NA	NA	NA	NA	NA	NA	South Atlantic	Taxonomy	Anthozoa	Tube dwelling anenome
Reimer, J. D., et al. (2014). "Ascension Island shallow-water Zoantharia (Hexacorallia: Cnidaria) and their zooxanthellae (Symbiodinium)." Journal of the Marine Biological Association of the United Kingdom 97(4): 695-703.	2014	Ascension	NA	NA	NA	NA	NA	NA	South Atlantic	Taxonomy	Anthozoa	Used historical samples to identify 4 zoantharian species
Padula, V., et al. (2014). "Heterobranch sea slugs (Mollusca: Gastropoda) from Ascension Island, South Atlantic Ocean." Journal of the Marine Biological Association of the United Kingdom 97(4): 743-752.	2014	Ascension	NA	NA	NA	NA	NA	NA	South Atlantic	Taxonomy	Mollusca	Species checklist, heterobranch sea slugs
Hoeksema, B. W., et al. (2014). "Millepora alcicornis (Hydrozoa: Capitata) at Ascension Island: confirmed identity based on morphological and molecular analyses." Journal of the Marine Biological Association of the United Kingdom 97(4): 709-712.	2014	Ascension	NA	NA	NA	NA	NA	NA	South Atlantic	Taxonomy	Hydrozoa	Millepora alcicornis report
De Grave, S., et al. (2014). "An updated checklist of the marine Decapoda of Ascension Island, central Atlantic Ocean." Journal of the Marine Biological Association of the United Kingdom 97(4): 759-770.	2014	Ascension	NA	NA	NA	NA	NA	NA	South Atlantic	Taxonomy	Crustacea	Decapods species checklist
Morley, S. A., et al. (2014). "Rates of warming and the global sensitivity of shallow water marine invertebrates to elevated temperature." Journal of the Marine Biological Association of the United Kingdom 96(1): 159-165.	2014	Ascension	NA	NA	NA	NA	NA	NA	South Atlantic	Biology	Comprehensive	Assessed the sensitivity of four species in Ascension (and non UKOTs) to warming.
Young, E. F., et al. (2014). "Variability in transport pathways on and around the South Georgia shelf, Southern Ocean: implications for recruitment and retention." Journal of Geophysical Research-Oceans 119(1): 241-252.	2014	SGSSI	NA	NA	NA	NA	NA	NA	Southern Ocean	Ecology	Plankton	Recruitment and retention patterns
Weber, S. B., et al. (2014). "Ascension Island as a mid-Atlantic developmental habitat for juvenile hawksbill turtles." Journal of the Marine Biological Association of the United Kingdom 97(4): 813-820.	2014	Ascension	NA	NA	NA	NA	NA	NA	South Atlantic	Distribution	Chelonioidea	Collate tracking data and public sightings to infer distribution
Weber, S. B., et al. (2014). "Recovery of the South Atlantic's largest green turtle nesting population." Biodiversity and Conservation 23(12): 3005-3018.	2014	Ascension	NA	NA	NA	NA	NA	NA	South Atlantic	Biology	Chelonioidea	Modelled long-term trends in nesting activity at both a rookery level and across individual nesting beaches and beach clusters using long-term monitoring data
Watson, A. C., et al. (2014). "Dynamic camouflage by Nassau groupers Epinephelus striatus on a Caribbean coral reef." Journal of Fish Biology 85(5): 1634-1649.	2014	Cayman Islands	NA	NA	NA	NA	NA	NA	Caribbean	Biology	Fish	Described observations of camouflage change and associated behaviour of Nassau groupers
Wang, C. X. and P. Malanotte-Rizzoli (2014). "Diagnosis of physical and biological controls on phytoplankton distribution in the Sargasso Sea." Journal of Ocean University of China 13(1): 32-44.	2014	Bermuda	NA	NA	NA	NA	NA	NA	North-western Atlantic	Biogeochemistry	Plankton	Vertical distributions of nutrients and biomass in the euphotic zone linked to physical processes
Volonterio, O. and P. E. Brewin (2014). "A new species of Allogenus (Tricladida, Maricola, Uteriporidae) from South Georgia, Sub-Antarctica." Journal of the Marine Biological Association of the United Kingdom 94(2): 309-316.	2014	SGSSI	NA	NA	NA	NA	NA	NA	Southern Ocean	Taxonomy	Other	New species discription
Vila-Costa, M., et al. (2014). "Microbial controls on DMSP degradation and DMS formation in the Sargasso Sea." Biogeochemistry 120(1-3): 295-305.	2014	Bermuda	NA	NA	NA	NA	NA	NA	North-western Atlantic	Biogeochemistry	Microbial community	Influence of biochemical influences on DMSP
Venti, A., et al. (2014). "Multiple driving factors explain spatial and temporal variability in coral calcification rates on the Bermuda platform." Coral Reefs 33(4): 979-997.	2014	Bermuda	NA	NA	NA	NA	NA	NA	North-western Atlantic	Biology	Anthozoa	Evaluated the correlation between seasonal average growth rates /calcification based on coral density and extension rates with average temperature, light, and seawater Xarag
Treibergs, L. A., et al. (2014). "Nitrogen isotopic response of prokaryotic and eukaryotic phytoplankton to nitrate availability in Sargasso Sea surface waters." Limnology and Oceanography 59(3): 972-985.	2014	Bermuda	NA	NA	NA	NA	NA	NA	North-western Atlantic	Biology	Plankton	Response of phytoplankton to nitrogen availability
Téllez, R., et al. (2014). "Initial description of short-finned pilot whale (Globicephala macrorhynchus) genetic diversity from the Caribbean." Biochemical Systematics and Ecology 56: 196-201.	2014	BVI	NA	NA	NA	NA	NA	NA	Caribbean	Genetics	Mammalia	Genetic information from 10 stranded short-finned pilot whales
Stone, J. P. and D. K. Steinberg (2014). "Long-term time-series study of salp population dynamics in the Sargasso Sea." Marine Ecology Progress Series 510: 111-127.	2014	Bermuda	NA	NA	NA	NA	NA	NA	North-western Atlantic	Biology	Plankton	Examined frequency and causes of salp blooms
Stewart, B. S. and J. S. Grove (2014). "An extreme wandering leopard seal, Hydrurga leptonyx, at Pitcairn Island, central South Pacific." Polar Biology 37(3): 423-425.	2014	Pitcairn	NA	NA	NA	NA	NA	NA	South Pacific	Distribution	Mammalia	Report of observed leopard seal
Song, B., et al. (2014). "Impact of volcanic ash on anammox communities in deep sea sediments." Environmental Microbiology Reports 6(2): 159-166.	2014	BVI	NA	NA	NA	NA	NA	NA	Caribbean	Biology	Microbial community	Rates of anammox and denitrification in deep-sea sediments
Sikkel, P. C., et al. (2014). "Low susceptibility of invasive red lionfish (Pterois volitans) to a generalist ectoparasite in both its introduced and native ranges." Plos One 9(5).	2014	Cayman Islands	BVI	NA	NA	NA	NA	NA	Caribbean	Biology	Fish	Susceptibility of lionfish to parasites
Schmidt, K., et al. (2014). "Feeding and overwintering of Antarctic krill across its major habitats: the role of sea ice cover, water depth, and phytoplankton abundance." Limnology and Oceanography 59(1): 17-36.	2014	BAT	SGSSI	NA	NA	NA	NA	NA	Southern Ocean	Biology	Plankton	Feeding and overwintering patterns of krill
Ryan, P. G., et al. (2014). "The occurrence of two bill morphs of prions Pachyptila vittata on Gough Island." Polar Biology 37(5): 727-735.	2014	Tristan	NA	NA	NA	NA	NA	NA	South Atlantic	Biology	Seabirds	Description of bills of petrels killed by skuas. Hypothesize two species
Ryan, P. G. (2014). "Litter survey detects the South Atlantic 'garbage patch'." Marine Pollution Bulletin 79(1-2): 220-224.	2014	Tristan	NA	NA	NA	NA	NA	NA	South Atlantic	Threat	NA	Litter survey along transect. Region D = Tristan/Gough Island
Rosas-Luis, R., et al. (2014). "Feeding habits and trophic interactions of Doryteuthis gahi, Illex argentinus and Onykia ingens in the marine ecosystem off the Patagonian Shelf." Fisheries Research 152: 37-44.	2014	Falkland Islands	NA	NA	NA	NA	NA	NA	South Atlantic	Ecology	Cephalopoda	Feeding ecology of squid
Reynolds, S. J., et al. (2014). "The sub-annual breeding cycle of a tropical seabird." Plos One 9(4).	2014	Ascension	NA	NA	NA	NA	NA	NA	South Atlantic	Biology	Seabirds	Breeding interval of the sooty tern over 16 years
Rexer-Huber, K., et al. (2014). "Burrow occupancy and population size in the Atlantic Petrel Pterodroma incerta: a comparison of methods." Marine Ornithology 42(2): 137-141.	2014	Tristan	NA	NA	NA	NA	NA	NA	South Atlantic	Biology	Seabirds	Estimated mean burrow density
Reid, T. A., et al. (2014). "The summer foraging ranges of adult spectacled petrels Procellaria conspicillata." Antarctic Science 26(1): 23-32.	2014	Tristan	NA	NA	NA	NA	NA	NA	South Atlantic	Distribution	Seabirds	Summer foraging ranges
Reed, A. J., et al. (2014). "Differential adaptations between cold-stenothermal environments in the bivalve Lissarca cf. miliaris (Philobryidae) from the Scotia Sea islands and Antarctic Peninsula." Journal of Sea Research 88: 11-20.	2014	SGSSI	BAT	NA	NA	NA	NA	NA	Southern Ocean	Biology	Mollusca	Variation in morphology, growth, and reproduction in L. cf. miliaris from six populations, spanning the Scotia Sea to the Antarctic Peninsula
Ratcliffe, N., et al. (2014). "Love thy neighbour or opposites attract? Patterns of spatial segregation and association among crested penguin populations during winter." Journal of Biogeography 41(6): 1183-1192.	2014	Falkland Islands	SGSSI	NA	NA	NA	NA	NA	South Atlantic, Southern Ocean	Distribution	Seabirds	Habitat preferences of macaroni vs southern rockhopper penguins
Putz, K., et al. (2014). "Post-fledging dispersal of King Penguins (Aptenodytes patagonicus) from two breeding sites in the South Atlantic." Plos One 9(5).	2014	Falkland Islands	SGSSI	NA	NA	NA	NA	NA	South Atlantic, Southern Ocean	Distribution	Seabirds	Dispersal of King penguin fledglings
Putman, N. F., et al. (2014). "Numerical dispersal simulations and genetics help explain the origin of hawksbill sea turtles in Ascension Island." Journal of Experimental Marine Biology and Ecology 450: 98-108.	2014	Ascension	NA	NA	NA	NA	NA	NA	South Atlantic	Genetics	Chelonioidea	Origin of juvenile hawksbills using Ascension as a foraging area
Pfingstl, T., et al. (2014). "Hidden in the mangrove forest: the cryptic intertidal mite Carinozetes mangrovi sp nov (Acari, Oribatida, Selenoribatidae)." Experimental and Applied Acarology 63(4): 481-495.	2014	Bermuda	NA	NA	NA	NA	NA	NA	North-western Atlantic	Genetics	Other	Genetics identified cryptic species
Pfingstl, T. and G. Krisper (2014). "Plastron respiration in marine intertidal oribatid mites (Acari, Fortuyniidae and Selenoribatidae)." Zoomorphology 133(4): 359-378.	2014	Bermuda	NA	NA	NA	NA	NA	NA	North-western Atlantic	Biology	Other	Plastron respiration investigated in the fortuyniid Alismobates inexpectatus, Fortuynia atlantica and the selenoribatid Carinozetes bermudensis
Navarro, J., et al. (2014). "Diving capabilities of diving petrels." Polar Biology 37(6): 897-901.	2014	SGSSI	NA	NA	NA	NA	NA	NA	Southern Ocean	Biology	Seabirds	Diving characteristics of Common and South Georgian Diving Petrels
Myers, A. A. (2014). "Amphipoda (Crustacea) from the Chagos Archipelago." Zootaxa 3754(1): 1-31.	2014	BIOT	NA	NA	NA	NA	NA	NA	Indian Ocean	Taxonomy	Crustacea	Description of amphipod species
Miya, T., et al. (2014). "The effect of habitat temperature on serum antifreeze glycoprotein (AFGP) activity in Notothenia rossii (Pisces: Nototheniidae) in the Southern Ocean." Polar Biology 37(3): 367-373.	2014	BAT	SGSSI	NA	NA	NA	NA	NA	Southern Ocean	Biology	Fish	Investigates whether the different environmental conditions experienced by N. rossii at different latitudes in the Southern Ocean affect the levels of its blood serum antifreeze glycoprotein
Marin, I. N. and S. E. Anosov (2014). "Betaeus truncatus Dana, 1852 (Crustacea: Decapoda: Caridea: Alpheidae) from South Georgia, South Atlantic Ocean - a new sub-Antarctic record of alpheid shrimps." Arthropoda Selecta 23(4): 379-381.	2014	SGSSI	NA	NA	NA	NA	NA	NA	Southern Ocean	Taxonomy	Crustacea	Description of species range extension
Loh, T. L. and J. R. Pawlik (2014). "Chemical defenses and resource trade-offs structure sponge communities on Caribbean coral reefs." Proceedings of the National Academy of Sciences of the United States of America 111(11): 4151-4156.	2014	Cayman Islands	NA	NA	NA	NA	NA	NA	Caribbean	Ecology	Porifera	Sponge community abundance & diversity related to predators
Johns, E. M., et al. (2014). "Amazon river water in the northeastern Caribbean Sea and its effect on larval reef fish assemblages during April 2009." Fisheries Oceanography 23(6): 472-494.	2014	BVI	NA	NA	NA	NA	NA	NA	Caribbean	Ecology	Plankton	Response in plankton community to Amazon river plume
Hochberg, R., et al. (2014). "Marine Gastrotricha of Little Cayman Island with the description of one new species and an initial assessment of meiofaunal diversity." Marine Biodiversity 44(1): 89-113.	2014	Cayman Islands	NA	NA	NA	NA	NA	NA	Caribbean	Biodiversity stocktake	Other	Description of Gastrotricha sp
Hedd, A., et al. (2014). "Seasonal sexual segregation by monomorphic sooty shearwaters Puffinus griseus reflects different reproductive roles during the pre-laying period." Plos One 9(1).	2014	Falkland Islands	NA	NA	NA	NA	NA	NA	South Atlantic	Distribution	Seabirds	Distribution of sooty shearwaters across seasons by sex
Hays, G. C., et al. (2014). "Use of long-distance migration patterns of an endangered species to inform conservation planning for the world's largest marine protected area." Conservation Biology 28(6): 1636-1644.	2014	BIOT	NA	NA	NA	NA	NA	NA	Indian Ocean	Distribution	Chelonioidea	Species use of protected vs unprotected space
Hawkes, L. A., et al. (2014). "High rates of growth recorded for hawksbill sea turtles in Anegada, British Virgin Islands." Ecology and Evolution 4(8): 1255-1266.	2014	BVI	NA	NA	NA	NA	NA	NA	Caribbean	Biology	Chelonioidea	Estimate growth rate of juvenile hawksbill turtles
Gregory, S., et al. (2014). "Ecology and distribution of the grey notothen, Lepidonotothen squamifrons, around South Georgia and Shag Rocks, Southern Ocean." Antarctic Science 26(3): 239-249.	2014	SGSSI	NA	NA	NA	NA	NA	NA	Southern Ocean	Ecology	Fish	Biology and ecology of an abundant ‘rockcod’ species, Lepidonotothen squamifrons
Granadeiro, J. P., et al. (2014). "Do individual seabirds specialize in fisheries' waste? The case of black-browed albatrosses foraging over the Patagonian Shelf." Animal Conservation 17(1): 19-26.	2014	Falkland Islands	NA	NA	NA	NA	NA	NA	South Atlantic	Threat	Seabirds	Investigate whether or not black browed albatross specialise in fisheries discards
Goodall-Copestake, W. P. (2014). "Morphological and molecular characterization of salps (Thalia spp.) from the Tristan da Cunha archipelago." Journal of Plankton Research 36(3): 883-888.	2014	Tristan	NA	NA	NA	NA	NA	NA	South Atlantic	Biology	Plankton	morphological and molecular profile of Thalia
Friedlander, A. M., et al. (2014). "The real bounty: marine biodiversity in the Pitcairn Islands." Plos One 9(6).	2014	Pitcairn	NA	NA	NA	NA	NA	NA	South Pacific	Biodiversity stocktake	Comprehensive	Integrated ecological assessment of the marine environment across islands
Forster, J., et al. (2014). "Marine dependent livelihoods and resilience to environmental change: a case study of Anguilla." Marine Policy 45: 204-212.	2014	Anguilla	NA	NA	NA	NA	NA	NA	Caribbean	Management	NA	Interviews with fishers and tourist operators to explore livelihoods and resilience
Fielding, S., et al. (2014). "Interannual variability in Antarctic krill (Euphausia superba) density at South Georgia, Southern Ocean: 1997-2013." Ices Journal of Marine Science 71(9): 2578-2588.	2014	SGSSI	NA	NA	NA	NA	NA	NA	Southern Ocean	Biology	Plankton	Interannual variability in Antarctic krill (Euphausia superba) density
Ferrara, C. R., et al. (2014). "First evidence that hatchlings of Chelonia mydas emit sounds." Copeia(2): 245-247.	2014	Ascension	NA	NA	NA	NA	NA	NA	South Atlantic	Biology	Chelonioidea	Analysis of sound records from hatchling turtles
Fawcett, S. E., et al. (2014). "The counterintuitive effect of summer-to-fall mixed layer deepening on eukaryotic new production in the Sargasso Sea." Global Biogeochemical Cycles 28(2): 86-102.	2014	Bermuda	NA	NA	NA	NA	NA	NA	North-western Atlantic	Biogeochemistry	Plankton	Plankton nitrate assimilation in the euphotic zone at BATS
Edwards, M. A., et al. (2014). "Age and growth of invasive lionfish (Pterois spp.) in the Caribbean Sea, with implications for management." Bulletin of Marine Science 90(4): 953-966.	2014	Cayman Islands	NA	NA	NA	NA	NA	NA	Caribbean	Biology	Fish	Age and growth of invasive lionfish
Dawson, J., et al. (2014). "Prioritizing islands for the eradication of invasive vertebrates in the United Kingdom overseas territories." Conservation Biology 29(1): 143-153.	2014	All	NA	NA	NA	NA	NA	NA	All	Management	NA	Prioritisation exercise for eradication of invasive species for benefit of, amongst others, seabirds and turtles
Cuthbert, R. J., et al. (2014). "Population trends and breeding success of albatrosses and giant petrels at Gough Island in the face of at-sea and on-land threats." Antarctic Science 26(2): 163-171.	2014	Tristan	NA	NA	NA	NA	NA	NA	South Atlantic	Biology	Seabirds	Population trends & breeding success of: Tristan albatross Diomedea dabbenena L., sooty albatross Phoebetria fusca Hilsenberg, Atlantic yellow-nosed albatross Thalassarche chlororhynchos (Gmelin) and southern giant petrels Macronectes giganteus (Gmelin)
Cumming, R. A., et al. (2014). "Transoceanic genetic similarities of kelp-associated sea slug populations: long-distance dispersal via rafting?" Journal of Biogeography 41(12): 2357-2370.	2014	Falkland Islands	NA	NA	NA	NA	NA	NA	South Atlantic	Genetics	Mollusca	Genetic diversity of Onchidella
Browning, T. J., et al. (2014). "Nutrient regimes control phytoplankton ecophysiology in the South Atlantic." Biogeosciences 11(2): 463-479.	2014	Tristan	NA	NA	NA	NA	NA	NA	South Atlantic	Biogeochemistry	Plankton	Response of phytoplankton to iron
Bonin, C. A., et al. (2014). "High male reproductive success in a low-density Antarctic fur seal (Arctocephalus gazella) breeding colony." Behavioral Ecology and Sociobiology 68(4): 597-604.	2014	BAT	NA	NA	NA	NA	NA	NA	Southern Ocean	Biology	Mammalia	Genetic analysis of a low-density breeding colony of Antarctic fur seals at Livingston Island
Bester, M. N., et al. (2014). "Vagrant Antarctic fur seals at the Tristan da Cunha Islands." Polar Biology 37(11): 1701-1703.	2014	Tristan	NA	NA	NA	NA	NA	NA	South Atlantic	Distribution	Mammalia	Observation of Antarctic fur seal at Tristan and Gough Island in 2013
Best, P. B., et al. (2014). "Identification of stomach contents from a Shepherd's beaked whale Tasmacetus shepherdi stranded on Tristan da Cunha, South Atlantic." Journal of the Marine Biological Association of the United Kingdom 94(6): 1093-1097.	2014	Tristan	NA	NA	NA	NA	NA	NA	South Atlantic	Ecology	Mammalia	Stomach contents from a stranded Shepherd's beaked whale
Baylis, A. M. M., et al. (2014). "Diet of South American fur seals at the Falkland Islands." Marine Mammal Science 30(3): 1210-1219.	2014	Falkland Islands	NA	NA	NA	NA	NA	NA	South Atlantic	Ecology	Mammalia	Foraging ecology of South American fur seals, diet analysis from scats
Balch, W. M., et al. (2014). "Surface biological, chemical, and optical properties of the Patagonian Shelf coccolithophore bloom, the brightest waters of the Great Calcite Belt." Limnology and Oceanography 59(5): 1715-1732.	2014	Falkland Islands	NA	NA	NA	NA	NA	NA	South Atlantic	Biology	Plankton	Properties of annual coccolithophore bloom
Andersson, A. J., et al. (2014). "Partial offsets in ocean acidification from changing coral reef biogeochemistry." Nature Climate Change 4(1): 56-61.	2014	Bermuda	NA	NA	NA	NA	NA	NA	North-western Atlantic	Biogeochemistry	Anthozoa	Relationship between ocean acidification & coral reef biogeochemistry
Amor, M. D., et al. (2015). "Genetic evidence extends the known distribution of Octopus insularis to the mid-Atlantic islands Ascension and St Helena." Journal of the Marine Biological Association of the United Kingdom 97(4): 753-758.	2015	Ascension	St Helena	NA	NA	NA	NA	NA	South Atlantic	Distribution	Cephalopoda	Molecular study identifying octopii in St Helena and Ascension and extending known range of Octopus vulgaris
Yeakel, K. L., et al. (2015). "Shifts in coral reef biogeochemistry and resulting acidification linked to offshore productivity." Proceedings of the National Academy of Sciences of the United States of America 112(47): 14512-14517.	2015	Bermuda	NA	NA	NA	NA	NA	NA	North-western Atlantic	Biogeochemistry	Anthozoa	OA, offshore productivity and coral reefs
Yáñez-Rivera, B. and J. Brown (2015). "Fireworms (Amphinomidae: Annelida) from Ascension and Saint Helena Island, Central South Atlantic Ocean." Marine Biodiversity Records 8.	2015	Ascension	St Helena	NA	NA	NA	NA	NA	South Atlantic	Taxonomy	Polychaete	Describes fireworm species
Yabut, M. G. and T. R. Sawicki (2015). "Idunella verrilli, a New Species of Subterranean Crustacean (Amphipoda: Gammaridea: Liljeborgiidae) from Green Bay Cave, Bermuda." Bulletin of the Peabody Museum of Natural History 56(2): 245-253.	2015	Bermuda	NA	NA	NA	NA	NA	NA	North-western Atlantic	Taxonomy	Crustacea	Describes a new species of crustacean
van Hooidonk, R., et al. (2015). "Downscaled projections of Caribbean coral bleaching that can inform conservation planning." Global Change Biology 21(9): 3389-3401.	2015	TCI	Montserrat	Anguilla	BVI	NA	NA	NA	Caribbean	Management	Anthozoa	Climate change projections of coral bleaching Caribbean wide
Taboada, S., et al. (2015). "Bone-eating worms spread: insights into shallow-water Osedax (Annelida, Siboglinidae) from Antarctic, Subantarctic, and Mediterranean waters." Plos One 10(11).	2015	SGSSI	BAT	NA	NA	NA	NA	NA	Southern Ocean	Genetics	Polychaete	Records of bone eating worms from whales
Stringell, T. B., et al. (2015). "Fisher choice may increase prevalence of green turtle fibropapillomatosis disease." Frontiers in Marine Science 2(AUG).	2015	TCI	NA	NA	NA	NA	NA	NA	Caribbean	Management	Chelonioidea	Increased prevalence of disease may occur because of fisher behaviour
Stringell, T. B., et al. (2015). "Protecting the breeders: research informs legislative change in a marine turtle fishery." Biodiversity and Conservation 24(7): 1775-1796.	2015	TCI	NA	NA	NA	NA	NA	NA	Caribbean	Management	Chelonioidea	Fisheries impact on green turtles
Sremba, A. L., et al. (2015). "Species identification and likely catch time period of whale bones from South Georgia." Marine Mammal Science 31(1): 122-132.	2015	SGSSI	NA	NA	NA	NA	NA	NA	Southern Ocean	Threat	Mammalia	Pre-exploitation genetic diversity of whales
Soler-Membrives, A. and T. Munilla (2015). "PYCNOIB: biodiversity and biogeography of Iberian Pycnogonids." Plos One 10(3): e0120818.	2015	Gibraltar	NA	NA	NA	NA	NA	NA	Mediterranean	Biogeography	Other	Distribution of sea spiders. Samples from Gibraltar?
Soffker, M., et al. (2015). "The impact of predation by marine mammals on Patagonian Toothfish longline fisheries." Plos One 10(3): e0118113.	2015	SGSSI	NA	NA	NA	NA	NA	NA	Southern Ocean	Management	Mammalia	Predatory interaction with longline vessels
Soanes, L. M., et al. (2015). "Tracking a small seabird: first records of foraging movements in the Sooty Tern Onychoprion fuscatus." Marine Ornithology 43(2): 235-239.	2015	Anguilla	NA	NA	NA	NA	NA	NA	Caribbean	Distribution	Seabirds	Sooty terns tracked from breeding ground
Soanes, L. M., et al. (2015). "Foraging behaviour of Brown Boobies Sula leucogaster in Anguilla, Lesser Antilles: preliminary identification of at-sea distribution using a time-in-area approach." Bird Conservation International 25(1): 87-96.	2015	Anguilla	NA	NA	NA	NA	NA	NA	Caribbean	Distribution	Seabirds	Brown boobies tracked from breeding ground
Schultz, N. E., et al. (2015). "A barcode analysis of the genus Lobophora (Dictyotales, Phaeophyceae) in the western Atlantic Ocean with four novel species and the epitypification of L. variegata (J.V. Lamouroux) E.C. Oliveira." European Journal of Phycology 50(4): 481-500.	2015	Bermuda	NA	NA	NA	NA	NA	NA	North-western Atlantic	Taxonomy	Macroalgae	Brown algal genus Lobophora species diversity, distribution, habitat
Schneider, C. W., et al. (2015). "A molecular-assisted alpha taxonomic study of the genus Centroceras (Ceramiaceae, Rhodophyta) in Bermuda reveals two novel species." Algae 30(1): 15-33.	2015	Bermuda	NA	NA	NA	NA	NA	NA	North-western Atlantic	Taxonomy	Macroalgae	Red algal genus Centroceras species diversity, distribution, habitat
Sauzede, R., et al. (2015). "Retrieving the vertical distribution of chlorophyll a concentration and phytoplankton community composition from in situ fluorescence profiles: a method based on a neural network with potential for global-scale applications." Journal of Geophysical Research-Oceans 120(1): 451-470.	2015	Bermuda	NA	NA	NA	NA	NA	NA	North-western Atlantic	Distribution	Plankton	Retrieve, from the sole knowledge of the fluorescence profile shape and geo-location, the vertical profile of (1) chlorophyll a concentration and (2) phytoplankton community size indices.
Saunders, R. A., et al. (2015). "Trophodynamics of Protomyctophum (Myctophidae) in the Scotia Sea (Southern Ocean)." Journal of Fish Biology 87(4): 1031-1058.	2015	BAT	SGSSI	NA	NA	NA	NA	NA	Southern Ocean	Biology	Fish	Spatial and temporal patterns in distribution, population structure and diet of lanternfish in Scotia Sea
Roche, R. C., et al. (2015). "Localized outbreaks of Acanthaster planci at an isolated and unpopulated reef atoll in the Chagos Archipelago." Marine Biology 162(8): 1695-1704.	2015	BIOT	NA	NA	NA	NA	NA	NA	Indian Ocean	Threat	Echinodermata	Shallow reef survey with targeted crown of thorns survey
Ratten, J. M., et al. (2015). "Sources of iron and phosphate affect the distribution of diazotrophs in the North Atlantic." Deep-Sea Research Part Ii-Topical Studies in Oceanography 116: 332-341.	2015	Bermuda	NA	NA	NA	NA	NA	NA	North-western Atlantic	Biology	Microbial community	Community structure, distribution across east-west transect in North Atlantic Ocean including BATs
Ratcliffe, N., et al. (2015). "Do krill fisheries compete with macaroni penguins? Spatial overlap in prey consumption and catches during winter." Diversity and Distributions 21(11): 1339-1348.	2015	SGSSI	NA	NA	NA	NA	NA	NA	Southern Ocean	Management	Seabirds, zooplankton	Competition between the macaroni penguin and the krill fishery by examining spatial overlap in prey consumption and catches
Ramos-Ascherl, Z., et al. (2015). "Parasitism in Pterois volitans (Scorpaenidae) from coastal waters of Puerto Rico, the Cayman Islands, and the Bahamas." Journal of Parasitology 101(1): 50-56.	2015	Cayman Islands	NA	NA	NA	NA	NA	NA	Caribbean	Biology	Fish, microbial	Examined parasites from Pterois volitans, a Pacific species of lionfish
Quillfeldt, P., et al. (2015). "Variability of higher trophic level stable isotope data in space and time - a case study in a marine ecosystem." Rapid Communications in Mass Spectrometry 29(7): 667-674.	2015	Falkland Islands	NA	NA	NA	NA	NA	NA	South Atlantic	Ecology	Fish, cephalopods, crustaceans	Feeding ecology of fish, squid & crustaceans based on stable isotope values
Quillfeldt, P., et al. (2015). "Half a world apart? overlap in nonbreeding distributions of Atlantic and Indian Ocean Thin-Billed Prions." Plos One 10(5).	2015	Falkland Islands	NA	NA	NA	NA	NA	NA	South Atlantic	Distribution	Seabirds	At-sea movements and feeding ecology of thin-billed prions
Pickett, M. and A. J. Andersson (2015). "Dissolution Rates of Biogenic Carbonates in Natural Seawater at Different pCO(2) Conditions: a Laboratory Study." Aquatic Geochemistry 21(6): 459-485.	2015	Bermuda	NA	NA	NA	NA	NA	NA	North-western Atlantic	Threat	Other	CO2 dissolution of biogenic carbonates in lab conditions
Pica, D., et al. (2015). "Southern hemisphere deep-water stylasterid corals including a new species, Errina labrosa sp n. (Cnidaria, Hydrozoa, Stylasteridae), with notes on some symbiotic scalpellids (Cirripedia, Thoracica, Scalpellidae)." Zookeys(472): 1-25.	2015	Tristan	NA	NA	NA	NA	NA	NA	South Atlantic	Ecology	Anthozoa	Report evidence of association between stylasterids and scalpellid pedunculate barnacles and describe a new stylasterid species
Perry, C. T., et al. (2015). "Remote coral reefs can sustain high growth potential and may match future sea-level trends." Scientific Reports 5.	2015	BIOT	NA	NA	NA	NA	NA	NA	Indian Ocean	Threat	Anthozoa	Examined recovery rates from 1998 bleaching event
Pedro, S., et al. (2015). "Mercury accumulation in gentoo penguins Pygoscelis papua: spatial, temporal and sexual intraspecific variations." Polar Biology 38(9): 1335-1343.	2015	SGSSI	NA	NA	NA	NA	NA	NA	Southern Ocean	Threat	Seabirds	Mercury concentrations in adult gentoo penguin feathers
Pedro, S., et al. (2015). "Feathers as a tool to assess mercury contamination in Gentoo Penguins: variations at the individual level." Plos One 10(9).	2015	SGSSI	NA	NA	NA	NA	NA	NA	Southern Ocean	Threat	Seabirds	Mercury concentrations in adult gentoo penguin feathers
Parsons, R. J., et al. (2015). "Marine bacterioplankton community turnover within seasonally hypoxic waters of a subtropical sound: Devil's Hole, Bermuda." Environmental Microbiology 17(10): 3481-3499.	2015	Bermuda	NA	NA	NA	NA	NA	NA	North-western Atlantic	Ecology	Microbial community	Bacterioplankton community changes with limiting oxygen
Oppel, S., et al. (2015). "Foraging distribution of a tropical seabird supports Ashmole's hypothesis of population regulation." Behavioral Ecology and Sociobiology 69(6): 915-926.	2015	Ascension	St Helena	NA	NA	NA	NA	NA	South Atlantic	Ecology	Seabirds	Energy expenditure/breeding success of masked boobies
Miller, M. J. (2015). "Nighttime vertical distribution and regional species composition of eel larvae in the western Sargasso Sea." Regional Studies in Marine Science 1: 34-46.	2015	Bermuda	NA	NA	NA	NA	NA	NA	North-western Atlantic	Ecology	Fish	Species composition and vertical distribution of eel larvae
Militelli, M. I., et al. (2015). "Maturity and fecundity of Champsocephalus gunnari, Chaenocephalus aceratus and Pseudochaenichthys georgianus in South Georgia and Shag Rocks Islands." Polar Science 9(2): 258-266.	2015	SGSSI	NA	NA	NA	NA	NA	NA	Southern Ocean	Biology	Fish	Reproductive biology of three species of icefishes (family Channicthyidae), Champsocephalus gunnari, Pseudochaenichthys georgianus and Chaenocephalus aceratus in South Georgia and Shag Rocks Islands
McKeown, N. J., et al. (2015). "Integrating genetic and otolith microchemistry data to understand population structure in the Patagonian Hoki (Macruronus magellanicus)." Fisheries Research 164: 1-7.	2015	Falkland Islands	NA	NA	NA	NA	NA	NA	South Atlantic	Biology	Fish	Connectivity (dispersal and gene flow) by non-natal homing of individuals to spawning aggregations of Patagonian hoki (Macruronus magellanicus)
McDonnell, A. M. P., et al. (2015). "Effects of sinking velocities and microbial respiration rates on the attenuation of particulate carbon fluxes through the mesopelagic zone." Global Biogeochemical Cycles 29(2): 175-193.	2015	Bermuda	BATs	NA	NA	NA	NA	NA	Southern Ocean, North-western Atlantic	Biogeochemistry	Plankton	Sinking velocities, microbial respiration of sinking particles and flux attenuation
McClanahan, T. R. and N. A. J. Graham (2015). "Marine reserve recovery rates towards a baseline are slower for reef fish community life histories than biomass." Proceedings of the Royal Society B-Biological Sciences 282(1821).	2015	BIOT	NA	NA	NA	NA	NA	NA	Indian Ocean	Management	Fish	Chagos part of a marine reserve reef site replicates
Martin, D., et al. (2015). "Proceraea janetae sp. nov. (Annelida, Syllidae, Autolytinae), a scleractinian coral feeder from Grand Cayman Island." Journal of the Marine Biological Association of the United Kingdom 95(4): 703-712.	2015	Cayman Islands	NA	NA	NA	NA	NA	NA	Caribbean	Taxonomy	Polychaete	New species of Autolytinae (Annelida, Syllidae), Proceraea janetae, described feeding on the scleractinian coral Montastrea cavernosa in coral reefs surrounding the Grand Cayman Island
Lins, L., et al. (2015). "Nematode community composition and feeding shaped by contrasting productivity regimes in the Southern Ocean." Progress in Oceanography 134: 356-369.	2015	SGSSI	NA	NA	NA	NA	NA	NA	Southern Ocean	Ecology	Other	Surveyed primary productivity, chlorphyll a, total sediment nematode fatty acid, nematode standing stock
Lee, W. Y., et al. (2015). "Diel diving behavior of breeding gentoo penguins on King George Island in Antarctica." Animal Cells and Systems 19(4): 274-281.	2015	SGSSI	NA	NA	NA	NA	NA	NA	Southern Ocean	Biology	Seabirds	Recorded diving behaviour of gentoo penguins
Laptikhovsky, V., et al. (2015). "Life history and population characteristics of the Antarctic starfish, Anasterias antarctica Lütken, 1856 (Asteroidea: Forcipulatida: Asteriidae) around the Falkland Islands." Polar Biology 38(4): 463-474.	2015	Falkland Islands	NA	NA	NA	NA	NA	NA	South Atlantic	Biology	Echinodermata	Describes distribution, growth, spawning, fecundity, and feeding habits of A. antarctica around the Falkland Islands
Kindinger, T. L. (2015). "Behavioral response of native Atlantic territorial three spot damselfish (Stegastes planifrons) toward invasive Pacific red lionfish (Pterois volitans)." Environmental Biology of Fishes 98(2): 487-498.	2015	Cayman Islands	NA	NA	NA	NA	NA	NA	Caribbean	Ecology	Fish	Compared behavioural response of native damselfish to invasive species and native fishes
Jeffries, T. C., et al. (2015). "Spatially extensive microbial biogeography of the Indian Ocean provides insights into the unique community structure of a pristine coral atoll." Scientific Reports 5.	2015	BIOT	NA	NA	NA	NA	NA	NA	Indian Ocean	Biogeography	Microbial community	Describe the genetic diversity and transcriptional dynamics of the microbial community in the lagoon of the Salomon Islands
Januchowski-Hartley, F. A., et al. (2015). "Local fishing influences coral reef fish behavior inside protected areas of the Indo-Pacific." Biological Conservation 182: 8-12.	2015	BIOT	NA	NA	NA	NA	NA	NA	Indian Ocean	Biology	Fish	Measured wariness of two families of coral reef fishes using Chagos as a wilderness baseline
Hughes, B. J., et al. (2015). "Identification of an assembly site for migratory and tropical seabirds in the South Atlantic Ocean." Global Ecology and Conservation 4: 38-47.	2015	Ascension	NA	NA	NA	NA	NA	NA	South Atlantic	Distribution	Seabirds	Distribution of pelagic seabirds around Ascension Island, description of seabird assembly site. Spatial data used from other studies but no new data generated
Head, C. E. I., et al. (2015). "High prevalence of obligate coral-dwelling decapods on dead corals in the Chagos Archipelago, central Indian Ocean." Coral Reefs 34(3): 905-915.	2015	BIOT	NA	NA	NA	NA	NA	NA	Indian Ocean	Ecology	Crustacea	Report on cryptofaunal role in reef strucutre
Hachich, N. F., et al. (2015). "Island biogeography: patterns of marine shallow-water organisms in the Atlantic Ocean." Journal of Biogeography 42(10): 1871-1882.	2015	St Helena	Ascension	NA	NA	NA	NA	NA	South Atlantic	Biogeography	Fish, macroalgae, crustaceans	Described large-scale biogeographical patterns of the species–area, species–island age and species–isolation relationships associated with marine shallow-water groups in the Atlantic Ocean
Guerreiro, M., et al. (2015). "Habitat and trophic ecology of Southern Ocean cephalopods from stable isotope analyses." Marine Ecology Progress Series 530: 119-134.	2015	SGSSI	NA	NA	NA	NA	NA	NA	Southern Ocean	Ecology	Cephalopoda	Ecological role of Southern Ocean cephalopod species by examining wandering albatross diet samples
Gravestock, P. and C. Sheppard (2015). "Valuing the ecosystem services of the Chagos: a review of challenges and estimates." Marine Ecology Progress Series 530: 255-270.	2015	BIOT	NA	NA	NA	NA	NA	NA	Indian Ocean	Economics	NA	Economic value of ecosystem services provided by Chagos marine reserve
Gordine, S. A., et al. (2015). "Fishing for drifts: detecting buoyancy changes of a top marine predator using a step-wise filtering method." Journal of Experimental Biology 218(23): 3816-3824.	2015	SGSSI	NA	NA	NA	NA	NA	NA	Southern Ocean	Biology	Mammalia	Bouyancy characterisation of Southern elephant seals dive profiles.
Goldsmith, D. B., et al. (2015). "Deep sequencing of the viral phoH gene reveals temporal variation, depth-specific composition, and persistent dominance of the same viral phoH genes in the Sargasso Sea." Peerj 3.	2015	Bermuda	NA	NA	NA	NA	NA	NA	North-western Atlantic	Genetics	Microbial community	Virus diversity at BATS
Goldsmith, D. B., et al. (2015). "Water column stratification structures viral community composition in the Sargasso Sea." Aquatic Microbial Ecology 76(2): 85-94.	2015	Bermuda	NA	NA	NA	NA	NA	NA	North-western Atlantic	Ecology	Microbial community	Spatial and temporal variability in viral diversity at BATS
Galea, H. R. (2015). "Hydroids (Cnidaria: Hydrozoa) from Tristan da Cunha and St. Helena." Marine Biodiversity Records 8: e154.	2015	Tristan	St Helena	NA	NA	NA	NA	NA	South Atlantic	Taxonomy	Hydrozoa	Describes shallow water hydroids around the islands
Gaither, M. R. and D. Wagner (2015). "Promiscuous associations: observations of gold-saddle goatfishes in the Chagos Archipelago (Indian Ocean)." Bulletin of Marine Science 91(3): 321-322.	2015	BIOT	NA	NA	NA	NA	NA	NA	Indian Ocean	Ecology	Fish	Observational description of unusual interaction between a juvenile gold-saddle goatfish and a cheeklined wrasse
Froy, H., et al. (2015). "Age-related variation in foraging behaviour in the Wandering Albatross at South Georgia: no evidence for senescence." Plos One 10(1).	2015	SGSSI	NA	NA	NA	NA	NA	NA	Southern Ocean	Biology	Seabirds	Age-related foraging behviour
Forrester, G., et al. (2015). "Comparing monitoring data collected by volunteers and professionals shows that citizen scientists can detect long-term change on coral reefs." Journal for Nature Conservation 24: 1-9.	2015	BVI	NA	NA	NA	NA	NA	NA	Caribbean	Ecology	Fish, anthozoa	Compared expert vs citizen science data collection on coral reefs
Dehnhard, N., et al. (2015). "Limited individual phenotypic plasticity in the timing of and investment into egg laying in southern rockhopper penguins under climate change." Marine Ecology Progress Series 524: 269-281.	2015	Falkland Islands	NA	NA	NA	NA	NA	NA	South Atlantic	Biology	Seabirds	Clutch initiation date and investment into egg mass in individually marked females in response to broad-scale and local climate variables across 7 yr
Dehnhard, N., et al. (2015). "Individual consistency and phenotypic plasticity in Rockhopper Penguins: female but not male body mass links environmental conditions to reproductive investment." Plos One 10(6).	2015	Falkland Islands	NA	NA	NA	NA	NA	NA	South Atlantic	Biology	Seabirds	Investigated 1) the individual consistency in body mass (measured at egg laying), body condition and reproductive investment across years, subsequently 2) identified the best explanatory temperature-related environmental variables for female and male body mass, and 3) tested the effect of female and male body mass on reproductive investment.
Crossin, G. T., et al. (2015). "Habitat selection by foraging macaroni penguins correlates with hematocrit, an index of aerobic condition." Marine Ecology Progress Series 530: 163-176.	2015	SGSSI	NA	NA	NA	NA	NA	NA	Southern Ocean	Biology	Seabirds	Explored links between ocean temperature, diving behavior, and foraging success in chick-rearing female macaroni penguins Eudyptes chrysolophus, and measures of individual physiological condition, specifically aerobic capacity (hematocrit) and metabolic state (corticosterone)
Coker, D. J., et al. (2015). "Habitat selectivity and reliance on live corals for Indo-Pacific Hawkfishes (Family: Cirrhitidae)." Plos One 10(11):e0138136.	2015	BIOT	NA	NA	NA	NA	NA	NA	Indian Ocean	Ecology	Fish	Examined habitat associations of hawkfishes, and explicitly tested whether hawkfishes associate with specific types of live coral.
Ceia, F. R., et al. (2015). "Analysis of stable isotope ratios in blood of tracked wandering albatrosses fails to distinguish a δ13C gradient within their winter foraging areas in the southwest Atlantic Ocean." Rapid Communications in Mass Spectrometry 29(24): 2328-2336.	2015	SGSSI	NA	NA	NA	NA	NA	NA	Southern Ocean	Biology	Seabirds	Diet composition/foraging areas & stable isotopes
Baylis, A. M. M., et al. (2015). "Winter foraging site fidelity of king penguins breeding at the Falkland Islands." Marine Biology 162(1): 99-110.	2015	Falkland Islands	NA	NA	NA	NA	NA	NA	South Atlantic	Distribution	Seabirds	Foraging site fidelity in winter of king penguins
Baylis, A. M. M., et al. (2015). "Diving deeper into individual foraging specializations of a large marine predator, the southern sea lion." Oecologia 179(4): 1053-1065.	2015	Falkland Islands	NA	NA	NA	NA	NA	NA	South Atlantic	Distribution	Mammalia	Foraging strategies of adult females
Baylis, A. M. M., et al. (2015). "Disentangling the cause of a catastrophic population decline in a large marine mammal." Ecology 96(10): 2834-2847.	2015	Falkland Islands	NA	NA	NA	NA	NA	NA	South Atlantic	Biology	Mammalia	Consider reasons for southern sea lion population decline
Baker, S., et al. (2015). "An ecosystems perspective for food security in the Caribbean: seagrass meadows in the Turks and Caicos Islands." Ecosystem Services 11: 12-21.	2015	TCI	NA	NA	NA	NA	NA	NA	Caribbean	Management	Macroalgae	Considers seagrass through food security lens
Darbyshire, T. and P. E. Brewin (2015). "Three new species of Dysponetus Levinsen, 1879 (Polychaeta: Chrysopetalidae) from the South Atlantic and Southern Ocean, with a re-description of Dysponetus bulbosus Hartmann-Schröder, 1982." Zootaxa 4040(3): 359-370.	2015	Falkland Islands	SGSSI	NA	NA	NA	NA	NA	South Atlantic, Southern Ocean	Taxonomy	Polychaete	Three new species described
Bamford, C. C. G. and K. P. Robinson (2016). "An analysis of dorsal edge markings in short-beaked common dolphins (Delphinus delphis) from the Bay of Gibraltar and the Moray Firth." Journal of the Marine Biological Association of the United Kingdom 96(4): 999-1004.	2016	Gibraltar	NA	NA	NA	NA	NA	NA	Mediterranean	Threat	Mammalia	Short beaked common dolphins studied to record dorsal fin damage and interactions with fisheries
Barnes, D. K. A., et al. (2016). "Why is the South Orkney Island shelf (the world's first high seas marine protected area) a carbon immobilization hotspot?" Global Change Biology 22(3): 1110-1120.	2016	BAT	SGSSI	NA	NA	NA	NA	NA	Southern Ocean	Biogeochemistry	Bryozoa	Investigates bryozoan densities, longevity and growth performance to determine carbon immobilisation and compares to SGSSI
Bartsch, I. (2016). "Antarctic Halacaridae (Acari), new records, these species characteristics and an updated list of species." Polish Polar Research 37(1): 131-154.	2016	SGSSI	BAT	NA	NA	NA	NA	NA	Southern Ocean	Biodiversity stocktake	Other	Reporting on 4 halacarid species
Basher, Z. and M. J. Costello (2016). "The past, present and future distribution of a deep-sea shrimp in the Southern Ocean." Peerj 4.	2016	SGSSI	BAT	NA	NA	NA	NA	NA	Southern Ocean	Distribution	Crustacea	Use species distribution models to predict changes in the geographic range of the deep-sea Antarctic shrimp under changing climatic conditions
Baylis, A. M. M., et al. (2016). "Pup vibrissae stable isotopes reveal geographic differences in adult female Southern Sea Lion habitat use during gestation." Plos One 11(6).	2016	Falkland Islands	NA	NA	NA	NA	NA	NA	South Atlantic	Biology	Mammalia	use the stable isotope ratios of southern sea lion (Otaria flavescens) pup vibrissae at the Falkland Islands, in the South Atlantic, as a proxy for adult female habitat use during gestation.
Baylis, A. M. M., et al. (2016). "Sexual segregation in habitat use is smaller than expected in a highly dimorphic marine predator, the southern sea lion." Marine Ecology Progress Series 554: 201-211.	2016	Falkland Islands	NA	NA	NA	NA	NA	NA	South Atlantic	Biology	Mammalia	Combine data from biologging tags, with stable isotope analysis of vibrissae, to assess sexual segregation in southern sea lions
Becker, P. H., et al. (2016). "Feather mercury concentrations in Southern Ocean seabirds: variation by species, site and time." Environmental Pollution 216: 253-263.	2016	Tristan	SGSSI	NA	NA	NA	NA	NA	South Atlantic, Southern Ocean	Threat	Seabirds	Total mercury concentrations in body feather samples of adults caught at breeding colonies from 2008 to 2011 were determined
Bell, J. B., et al. (2016). "Geochemistry, faunal composition and trophic structure in reducing sediments on the southwest South Georgia margin." Royal Society Open Science 3(9).	2016	SGSSI	NA	NA	NA	NA	NA	NA	Southern Ocean	Ecology	Comprehensive	Impact on faunal communities of reducing sediments
Brewin, P. E., et al. (2016). "Diurnal variation of fish and macrobenthic invertebrate community structure in an isolated oceanic island of the South Atlantic." Journal of the Marine Biological Association of the United Kingdom 96(3): 737-747.	2016	Ascension	NA	NA	NA	NA	NA	NA	South Atlantic	Ecology	Comprehensive	Trophic structure of sub-tidal reef assemblages described day and night
Brickle, P., et al. (2016). "Otolith trace elemental analyses of South American Austral Hake, Merluccius australis (Hutton, 1872) indicates complex salinity structuring on their spawning/larval grounds." Plos One 11(1).	2016	Falkland Islands	NA	NA	NA	NA	NA	NA	South Atlantic	Biology	Fish	Trace elements from otoliths used to provide insight to stock discrimination and migrations
Carr, L. M. and D. Y. Liu (2016). "Measuring stakeholder perspectives on environmental and community stability in a tourism-dependent economy." International Journal of Tourism Research 18(6): 620-632.	2016	TCI	NA	NA	NA	NA	NA	NA	Caribbean	Management	NA	Questionnaire examining local population's perspective of importance of marine environment/policy
Churchyard, T., et al. (2016). "The biodiversity of the United Kingdom’s Overseas Territories: a stock take of species occurrence and assessment of key knowledge gaps." Biodiversity and Conservation 25: 1677.	2016	All	NA	NA	NA	NA	NA	NA	All	Biodiversity stocktake	Comprehensive	Literature review and consultation to identify species lists for each OT
Clay, T. A., et al. (2016). "Proximate drivers of spatial segregation in non-breeding albatrosses." Scientific Reports 6:29932.	2016	SGSSI	BAT	Falkland Islands	NA	NA	NA	NA	Southern Ocean, South Atlantic	Distribution	Seabirds	Habitat utilisation distribution for non-breeding grey-headed albatross
Clucas, G. V., et al. (2016). "Dispersal in the sub-Antarctic: king penguins show remarkably little population genetic differentiation across their range." Bmc Evolutionary Biology 16.	2016	SGSSI	Falkland Islands	NA	NA	NA	NA	NA	Southern Ocean, South Atlantic	Genetics	Seabirds	Investigated genetic population structure and patterns of colonisation for King penguins
Cotti-Rausch, B. E., et al. (2016). "Mesoscale and sub-mesoscale variability in phytoplankton community composition in the Sargasso Sea." Deep-Sea Research Part I-Oceanographic Research Papers 110: 106-122.	2016	Bermuda	NA	NA	NA	NA	NA	NA	North-western Atlantic	Ecology	Plankton	Phytoplankton biomass and community composition measures at BATs and south of Bermuda EEZ in response to eddys
D'Agata, S., et al. (2016). "Unexpected high vulnerability of functions in wilderness areas: evidence from coral reef fishes." Proceedings of the Royal Society B-Biological Sciences 283(1844).	2016	BIOT	NA	NA	NA	NA	NA	NA	Indian Ocean	Threat	Fish	Investigated functional redundancy and explored vulnerability to fishing
Dehnhard, N., et al. (2016). "Plasticity in foraging behaviour and diet buffers effects of inter-annual environmental differences on chick growth and survival in southern rockhopper penguins Eudyptes chrysocome chrysocome." Polar Biology 39(9): 1627-1641.	2016	Falkland Islands	NA	NA	NA	NA	NA	NA	South Atlantic	Ecology	Seabirds	Documented foraging behaviour and diet and linked to chick growth rates and survival
Dornburg, A., et al. (2016). "Cryptic species diversity in sub-Antarctic islands: A case study of Lepidonotothen." Molecular Phylogenetics and Evolution 104: 32-43.	2016	SGSSI	NA	NA	NA	NA	NA	NA	Southern Ocean	Taxonomy	Fish	Examined genetic diversity of Antarctic notothenioid fish species Lepidonotothen nudifrons to demonstrate cryptic species
Ellingson, R. A. and P. J. Krug (2016). "Reduced genetic diversity and increased reproductive isolation follow population-level loss of larval dispersal in a marine gastropod." Evolution 70(1): 18-37.	2016	Bermuda	NA	NA	NA	NA	NA	NA	North-western Atlantic	Biology	Mollusca	Examined genetic diversity/connectivity for sea slugs
Endres, C. S., et al. (2016). "Multi-Modal Homing in Sea Turtles: modeling dual use of geomagnetic and chemical cues in island-finding." Frontiers in Behavioral Neuroscience 10.	2016	Ascension	NA	NA	NA	NA	NA	NA	South Atlantic	Biology	Chelonioidea	Considered navigational cues for turtles between Brazil and Ascension Island
Esteban, N., et al. (2016). "Male hatchling production in sea turtles from one of the world's largest marine protected areas, the Chagos Archipelago." Scientific Reports 6.	2016	BIOT	NA	NA	NA	NA	NA	NA	Indian Ocean	Biology	Chelonioidea	Relates beach characteristics to incubation temperature and sex ratio of turtles
Fallon, N. G., et al. (2016). "Assessing consistency of fish survey data: uncertainties in the estimation of mackerel icefish (Champsocephalus gunnari) abundance at South Georgia." Polar Biology 39(4): 593-603.	2016	SGSSI	NA	NA	NA	NA	NA	NA	Southern Ocean	Management	Fish	Evaluates accuracy of stock assessment of mackerel icefish
Fallon, N. G., et al. (2016). "Classification of Southern Ocean krill and icefish echoes using random forests." Ices Journal of Marine Science 73(8): 1998-2008.	2016	SGSSI	NA	NA	NA	NA	NA	NA	Southern Ocean	Management	Fish, zooplankton	Examined survey methods to distinguish co-occuring species
Frans, V. F. and A. A. Auge (2016). "Use of local ecological knowledge to investigate endangered baleen whale recovery in the Falkland Islands." Biological Conservation 202: 127-137.	2016	Falkland Islands	NA	NA	NA	NA	NA	NA	South Atlantic	Management	Mammalia	Used sightings and historical whaling data to document recovery of baleen whales
Gonzalez-Wevar, C. A., et al. (2016). "Genetics, gene flow, and glaciation: the case of the South American Limpet Nacella mytilina." Plos One 11(9).	2016	Falkland Islands	NA	NA	NA	NA	NA	NA	South Atlantic	Genetics	Mollusca	Phylogenetic analyses/genetic diversity of kelp swelling South American Limpet Nacella mytilina
Goodwin, C., et al. (2016). "Sponge biodiversity of Beauchêne and the Sea Lion Islands and south-east East Falkland, Falkland Islands, with a description of nine new species." Journal of the Marine Biological Association of the United Kingdom 96(2): 263-290.	2016	Falkland Islands	NA	NA	NA	NA	NA	NA	South Atlantic	Taxonomy	Porifera	Description of sponge species
Handley, J. M., et al. (2016). "Temporal variation in the diet of gentoo penguins at the Falkland Islands." Polar Biology 39(2): 283-296.	2016	Falkland Islands	NA	NA	NA	NA	NA	NA	South Atlantic	Ecology	Seabirds	Diet analysis of gentoo penguins
Handley, J. M. and P. Pistorius (2016). "Kleptoparasitism in foraging gentoo penguins Pygoscelis papua." Polar Biology 39(2): 391-395.	2016	Falkland Islands	NA	NA	NA	NA	NA	NA	South Atlantic	Ecology	Seabirds	Tagged gentoo penguins with camera, observed kleptoparasitism
Henderson, A. C., et al. (2016). "Assessing the incidental value of a marine reserve to a lemon shark Negaprion brevirostris nursery." Aquatic Conservation-Marine and Freshwater Ecosystems 26(3): 482-491.	2016	TCI	NA	NA	NA	NA	NA	NA	Caribbean	Management	Fish	Evaluated Bell Sound Nature Reserve's value for juvenile lemon sharks
Hoffman, J. I., et al. (2016). "Population structure and historical demography of South American sea lions provide insights into the catastrophic decline of a marine mammal population." Royal Society Open Science 3(7).	2016	Falkland Islands	NA	NA	NA	NA	NA	NA	South Atlantic	Genetics	Mammalia	Genetic diversity across 23 colonies of South American sea lion
Hogg, O. T., et al. (2016). "Landscape mapping at sub-Antarctic South Georgia provides a protocol for underpinning large-scale marine protected areas." Scientific Reports 6.	2016	SGSSI	NA	NA	NA	NA	NA	NA	Southern Ocean	Management	NA	Habitat mapping using physical oceanographic data to inform MPA design
Holzer, K. K. and K. J. McGlathery (2016). "Cultivation grazing response in seagrass may depend on phosphorus availability." Marine Biology 163(4).	2016	Bermuda	NA	NA	NA	NA	NA	NA	North-western Atlantic	Ecology	Macroalgae	Investigated turtlegrass plant response to repeated herbivory by green turtle
Horswill, C., et al. (2016). "Unravelling the relative roles of top-down and bottom-up forces driving population change in an oceanic predator." Ecology 97(8): 1919-1928.	2016	SGSSI	NA	NA	NA	NA	NA	NA	Southern Ocean	Ecology	Seabirds	Population dynamics & demography of Macaroni penguins from long-term monitoring data
Jimenez, S., et al. (2016). "Sex-related variation in the vulnerability of wandering albatrosses to pelagic longline fleets." Animal Conservation 19(3): 281-295.	2016	SGSSI	NA	NA	NA	NA	NA	NA	Southern Ocean	Management	Seabirds	Used tracking data for female wandering albatross to evaluate interactions with ICCAT fisheries
Krumhardt, K. M., et al. (2016). "Apparent increase in coccolithophore abundance in the subtropical North Atlantic from 1990 to 2014." Biogeosciences 13(4): 1163-1177.	2016	Falkland Islands	NA	NA	NA	NA	NA	NA	South Atlantic	Biology	Plankton	Coccolithophore abundance and calcification trends
Lester, S. E., et al. (2016). "Environmental and economic implications of alternative cruise ship pathways in Bermuda." Ocean & Coastal Management 132: 70-79.	2016	Bermuda	NA	NA	NA	NA	NA	NA	North-western Atlantic	Management	NA	Evaluated environmental (and economic) impact of alternative cruise ship pathways to accommodate larger ships
Letessier, T. B., et al. (2016). "Enhanced pelagic biomass around coral atolls." Marine Ecology Progress Series 546: 271-276.	2016	BIOT	NA	NA	NA	NA	NA	NA	Indian Ocean	Distribution	Fish, zooplankton	Documented distribution of euphausiids and lanternfish and drivers of this
Levine, N. M., et al. (2016). "Revising upper-ocean sulfur dynamics near Bermuda: new lessons from 3 years of concentration and rate measurements." Environmental Chemistry 13(2): 302-313.	2016	Bermuda	NA	NA	NA	NA	NA	NA	North-western Atlantic	Biogeochemistry	Plankton	Microbial community contribution to dimethylsulfide
Levy, H., et al. (2016). "Population structure and phylogeography of the Gentoo Penguin (Pygoscelis papua) across the Scotia Arc." Ecology and Evolution 6(6): 1834-1853.	2016	SGSSI	Falkland Islands	BAT	NA	NA	NA	NA	Southern Ocean, South Atlantic	Genetics	Seabirds	Genetic study of gentoo penguins across Southern Ocean, and range
McClelland, G. T. W., et al. (2016). "Rapid population estimate of a surface-nesting seabird on a remote island using a low-cost unmanned aerial vehicle." Marine Ornithology 44(2): 215-220.	2016	Tristan	NA	NA	NA	NA	NA	NA	South Atlantic	Management	Seabirds	Used UAV to assess the population status of the Tristan Albatross
Merten, W., et al. (2016). "Movement dynamics of dolphinfish (Coryphaena hippurus) in the northeastern Caribbean Sea: evidence of seasonal re-entry into domestic and international fisheries throughout the western central Atlantic." Fisheries Research 175: 24-34.	2016	Anguilla	BVI	Montserrat	NA	NA	NA	NA	Caribbean	Distribution	Fish	Documents fishery exchange for dolphinfish between US & Caribbean. Evidence of dolphinfish moving to BVI, Anguilla and Montserrat presented
Moreno, R., et al. (2016). "Assessing the structure and temporal dynamics of seabird communities: the challenge of capturing marine ecosystem complexity." Journal of Animal Ecology 85(1): 199-212.	2016	SGSSI	NA	NA	NA	NA	NA	NA	Southern Ocean	Ecology	Seabirds	Assessed the trophic structure of the procellariiform community breeding at South Georgia, to identify the factors that determine foraging niches and possible temporal changes.
Morrow, K. M., et al. (2016). "Environmental drivers of microbial community shifts in the giant barrel sponge, Xestospongia muta, over a shallow to mesophotic depth gradient." Environmental Microbiology 18(6): 2025-2038.	2016	Cayman Islands	NA	NA	NA	NA	NA	NA	Caribbean	Biology	Porifera	Examined community structure and disimilarity across depth gradient of giant barrel sponge
Oosthuizen, W. C., et al. (2016). "Geographic variation in subantarctic Fur Seal pup growth: linkages with environmental variability and population density." Journal of Mammalogy 97(2): 347-360.	2016	Tristan	NA	NA	NA	NA	NA	NA	South Atlantic	Biology	Mammalia	Assessed geographic and temporal variation in growth rates and weaning mass of subantarctic fur seal pups on Gough Island
Pinheiro, H. T., et al. (2016). "Upper and lower mesophotic coral reef fish communities evaluated by underwater visual censuses in two Caribbean locations." Coral Reefs 35(1): 139-151.	2016	Bermuda	NA	NA	NA	NA	NA	NA	North-western Atlantic	Ecology	Fish	Underwater visual census of mesophotic coral ecosystem reef fish communities
Rembauville, M., et al. (2016). "Strong contribution of diatom resting spores to deep-sea carbon transfer in naturally iron-fertilized waters downstream of South Georgia." Deep-Sea Research Part I-Oceanographic Research Papers 115: 22-35.	2016	SGSSI	NA	NA	NA	NA	NA	NA	Southern Ocean	Biogeochemistry	Plankton	Biogeochemical and diatom export fluxes presented from two bathypelagic sediment trap deployments
Robertson, B. C., et al. (2016). "Phylogenetic affinities of the Fregetta storm-petrels are not black and white." Molecular Phylogenetics and Evolution 97: 170-176.	2016	Tristan	NA	NA	NA	NA	NA	NA	South Atlantic	Genetics	Seabirds	Phylogenetic affinities of the Fregetta storm-petrels
Robinson, J., et al. (2016). "A tale of three islands: Downstream natural iron fertilization in the Southern Ocean." Journal of Geophysical Research-Oceans 121(5): 3350-3371.	2016	SGSSI	NA	NA	NA	NA	NA	NA	Southern Ocean	Biology	Plankton	Evaluates whether lateral advection of iron could explain variability in the spatial extent of phytoplankton blooms
Rodriguez-Rey, G. T., et al. (2016). "Genetic structure and diversity of the island-restricted endangered land crab, Johngarthia lagostoma (H. Milne Edwards, 1837)." Journal of Experimental Marine Biology and Ecology 474: 204-209.	2016	Ascension	NA	NA	NA	NA	NA	NA	South Atlantic	Genetics	Crustacea	Genetic structure and diversity throughout land crab's (Johngarthia laostoma) range. Included as has a marine planktotrophic larval stage.
Rollinson, D. P., et al. (2016). "Diving behaviour of Grey Petrels and its relevance for mitigating long-line by-catch." Emu 116(4): 340-349.	2016	Tristan	NA	NA	NA	NA	NA	NA	South Atlantic	Distribution	Seabirds	Foraging ecology, diving behaviour of grey petrels tagged around Gough Island, related to fisheries interaction
Roscales, J. L., et al. (2016). "Latitudinal exposure to DDTs, HCB, PCBs, PBDEs and DP in giant petrels (Macronectes spp.) across the Southern Ocean." Environmental Research 148: 285-294.	2016	SGSSI	Tristan	NA	NA	NA	NA	NA	Southern Ocean, South Atlantic	Threat	Seabirds	Assessed level of pollutants in southern giant petrels
Roterman, C. N., et al. (2016). "Connectivity in the cold: the comparative population genetics of vent-endemic fauna in the Scotia Sea, Southern Ocean." Molecular Ecology 25(5): 1073-1088.	2016	SGSSI	NA	NA	NA	NA	NA	NA	Southern Ocean	Genetics	Mollusca	Comparative population genetics study for vent fauna
Ryan, P. G., et al. (2016). "Regional differences in plastic ingestion among Southern Ocean fur seals and albatrosses." Marine Pollution Bulletin 104(1-2): 207-210.	2016	Tristan	NA	NA	NA	NA	NA	NA	South Atlantic	Threat	Mammalia, Seabirds	Regional differences in fur seals and albatrosses plastic ingestion across Southern Ocean
Sanches, P. F., et al. (2016). "Multivariate analyses of Antarctic and sub-Antarctic seaweed distribution patterns: an evaluation of the role of the Antarctic Circumpolar Current." Journal of Sea Research 110: 29-38.	2016	BAT	SGSSI	Falkland Islands	NA	NA	NA	NA	Southern Ocean, South Atlantic	Distribution	Macroalgae	Seaweed distribution patterns across South Atlantic. Species lists generated (methods) but results for each study locality not presented. Would need to request for specific data to Ots
Scales, K. L., et al. (2016). "Identifying predictable foraging habitats for a wide-ranging marine predator using ensemble ecological niche models." Diversity and Distributions 22(2): 212-224.	2016	SGSSI	NA	NA	NA	NA	NA	NA	Southern Ocean	Distribution	Seabirds	Integrate biologging, satellite remote-sensing and ensemble ecological niche models (EENMs) to identify predictable foraging habitats for grey-headed albatross
Schmidt, K., et al. (2016). "Zooplankton gut passage mobilizes lithogenic iron for ocean productivity." Current Biology 26(19): 2667-2673.	2016	SGSSI	NA	NA	NA	NA	NA	NA	Southern Ocean	Biogeochemistry	Plankton	Role of krill in nutrient cycle and link to phytoplankton blooms
Schneider, C. W., et al. (2016). "Notes on the marine algae of the Bermudas. 15. Dichotomaria huismanii (Galaxauraceae, Rhodophyta), a new species in the D. marginata complex from the western Atlantic." Botanica Marina 59(1): 13-29.	2016	Bermuda	NA	NA	NA	NA	NA	NA	North-western Atlantic	Taxonomy	Macroalgae	Description of new species
Seco, J., et al. (2016). "Distribution of short-finned squid Illex argentinus (Cephalopoda: Ommastrephidae) inferred from the diets of Southern Ocean albatrosses using stable isotope analyses." Journal of the Marine Biological Association of the United Kingdom 96(6): 1211-1215.	2016	SGSSI	NA	NA	NA	NA	NA	NA	Southern Ocean	Ecology	Cephalopoda	Infer distribution of squid Illex argentinus from diet of albatross breeding on South Georgia
Seco, J., et al. (2016). "Distribution, habitat and trophic ecology of Antarctic squid Kondakovia longimana and Moroteuthis knipovitchi: inferences from predators and stable isotopes." Polar Biology 39(1): 167-175.	2016	SGSSI	NA	NA	NA	NA	NA	NA	Southern Ocean	Ecology	Cephalopoda	Infer distribution of squid Illex argentinus from diet of toothfish around South Georgia
Sirovic, A., et al. (2016). "Ocean ambient sound south of Bermuda and Panama Canal traffic." Journal of the Acoustical Society of America 139(5): 2417-2423.	2016	Bermuda	NA	NA	NA	NA	NA	NA	North-western Atlantic	Threat	NA	Compares historical vs current ocean ambient noise, human and natural (whales)
Slattery, M., et al. (2016). "Variability in chemical defense across a shallow to mesophotic depth gradient in the Caribbean sponge Plakortis angulospiculatus." Coral Reefs 35(1): 11-22.	2016	Cayman Islands	NA	NA	NA	NA	NA	NA	Caribbean	Biology	Porifera	Defense against predatory fish across depth zones
Soanes, L. M., et al. (2016). "Important foraging areas of seabirds from Anguilla, Caribbean: implications for marine spatial planning." Marine Policy 70: 85-92.	2016	Anguilla	NA	NA	NA	NA	NA	NA	Caribbean	Management	Seabirds	Three years of seabird tracking data used to inform MSP
Stone, J. P. and D. K. Steinberg (2016). "Salp contributions to vertical carbon flux in the Sargasso Sea." Deep-Sea Research Part I: Oceanographic Research Papers 113: 90-100.	2016	Bermuda	NA	NA	NA	NA	NA	NA	North-western Atlantic	Biogeochemistry	Plankton	Salp contributions to vertical carbon flux
Stringell, T. B., et al. (2016). "Taxonomic distinctness in the diet of two sympatric marine turtle species." Marine Ecology-an Evolutionary Perspective 37(5): 1036-1049.	2016	TCI	NA	NA	NA	NA	NA	NA	Caribbean	Ecology	Chelonioidea	Stomach contents of green and hawkbill turtles used to assess diet composition and taxonomic distinctiveness
Tancell, C., et al. (2016). "Marine spatial planning for the conservation of albatrosses and large petrels breeding at South Georgia." Biological Conservation 198: 165-176.	2016	SGSSI	NA	NA	NA	NA	NA	NA	Southern Ocean	Management	Seabirds	Seabird tracking data used to inform MSP
Tarling, G. A., et al. (2016). "Growth and shrinkage in Antarctic krill Euphausia superba is sex-dependent." Marine Ecology Progress Series 547: 61-78.	2016	SGSSI	BAT	NA	NA	NA	NA	NA	Southern Ocean	Biology	Plankton	Describes biological response of krill to survive winter
Tremblay, N. and D. Abele (2016). "Response of three krill species to hypoxia and warming: an experimental approach to oxygen minimum zones expansion in coastal ecosystems." Marine Ecology-an Evolutionary Perspective 37(1): 179-199.	2016	SGSSI	NA	NA	NA	NA	NA	NA	Southern Ocean	Threat	Plankton	Investigates krill response to warming and hypoxia
Ulman, A., et al. (2016). "Conched out: Total reconstructed fisheries catches for the Turks and Caicos islands uncover unsustainable resource usage." Frontiers in Marine Science 3(MAY).	2016	TCI	NA	NA	NA	NA	NA	NA	Caribbean	Management	NA	Reconstructed total marine fisheries catches
von Reumont, J., et al. (2016). "Impact of warming events on reef-scale temperature variability as captured in two Little Cayman coral Sr/Ca records." Geochemistry Geophysics Geosystems 17(3): 846-857.	2016	Cayman Islands	NA	NA	NA	NA	NA	NA	Caribbean	Threat	Anthozoa	Response of coral to SST
Waldrop, E., et al. (2016). "Phylogeography, population structure and evolution of coral-eating butterflyfishes (Family Chaetodontidae, genus Chaetodon, subgenus Corallochaetodon)." Journal of Biogeography 43(6): 1116-1129.	2016	BIOT	NA	NA	NA	NA	NA	NA	Indian Ocean	Genetics	Fish	Phylogeography, population structure and evolution of coral-eating butterflyfishes
Wallace, E. M. and M. D. Tringali (2016). "Fishery composition and evidence of population structure and hybridization in the Atlantic bonefish species complex (Albula spp.)." Marine Biology 163(6).	2016	Cayman Islands	TCI	BVI	NA	NA	NA	NA	Caribbean	Genetics	Fish	Genetics to identify recreational fishery composition
Harder, A. M., et al. (2016). "Diversity and distribution within the sea spider genus Pallenopsis (Chelicerata: Pycnogonida) in the Western Antarctic as revealed by mitochondrial DNA." Polar Biology 39(4): 677-688.	2016	SGSSI	Falkland Islands	NA	NA	NA	NA	NA	Southern Ocean	Genetics	Other	Describes genetic structure of Pallenopsis populations of western Antarctic coastal region
Zibrowius, H., et al. (2017). "Shallow-water scleractinian corals of Ascension Island, Central South Atlantic." Journal of the Marine Biological Association of the United Kingdom 97(4): 713-725.	2017	Ascension	NA	NA	NA	NA	NA	NA	South Atlantic	Taxonomy	Anthozoa	Surveyed scleractinian species present in shallow waters
Xavier, J. C., et al. (2017). "Sexual and individual foraging segregation in Gentoo penguins Pygoscelis papua from the Southern Ocean during an abnormal winter." Plos One 12(3).	2017	SGSSI	NA	NA	NA	NA	NA	NA	Southern Ocean	Ecology	Seabirds	Feeding ecology of Gentoo penguins surveyed through stomach contents and stable isotope values during austral winter
Waluda, C. M., et al. (2017). "Long-term variability in the diet and reproductive performance of penguins at Bird Island, South Georgia." Marine Biology 164(3).	2017	SGSSI	NA	NA	NA	NA	NA	NA	Southern Ocean	Ecology	Seabirds	Feeding ecology of Gentoo penguins surveyed through stomach contents during breeding season
van Woesik, R. and C. J. Randall (2017). "Coral disease hotspots in the Caribbean." Ecosphere 8(5):e01814.	2017	TCI	Cayman Islands	Montserrat	Anguilla	BVI	NA	NA	Caribbean	Threat	Anthozoa	Models white/yellow band coral disease risk throughout Caribbean
Tuttle, L. J., et al. (2017). "Parasite-mediated enemy release and low biotic resistance may facilitate invasion of Atlantic coral reefs by Pacific red lionfish (Pterois volitans)." Biological Invasions 19(2): 563-575.	2017	Cayman Islands	NA	NA	NA	NA	NA	NA	Caribbean	Threat	Fish	Fewer lionfish parasitised in introduced range (Cayman) vs native Pacific range. Hypothesised to contribute to successful range expansion
Tickler, D. M., et al. (2017). "Drivers of abundance and spatial distribution of reef-associated sharks in an isolated atoll reef system." Plos One 12(5).	2017	BIOT	NA	NA	NA	NA	NA	NA	Indian Ocean	Ecology	Fish	Biomass of low trophic order fish had greatest effect on shark abundance
Rojo-Nieto, E. and C. Fernandez-Maldonado (2017). "Assessing trace elements in striped dolphins from the Strait of Gibraltar: clues to link the bioaccumulation in the westernmost Mediterranean Sea area and nearest Atlantic Ocean (vol 170, pg 41, 2017)." Chemosphere 178: 573-573.	2017	Gibraltar	NA	NA	NA	NA	NA	NA	Mediterranean	Threat	Mammalia	Study areas around Strait of Gibraltar sampled, including in E & W of Gibraltar
Robinson, J., et al. (2017). "Far-field connectivity of the UK's four largest marine protected areas: four of a kind?" Earths Future 5(5): 475-494.	2017	Pitcairn	SGSSI	Ascension	BIOT	NA	NA	NA	South Pacific, Southern Ocean, South Atlantic, Indian Ocean	Management	NA	Model connectivity between 4 UKOT LSMPAs and land
Ramos, R., et al. (2017). "It is the time for oceanic seabirds: Tracking year-round distribution of gadfly petrels across the Atlantic Ocean." Diversity and Distributions 23(7): 794-805.	2017	SGSSI	Tristan	St Helena	Ascension	Falkland Islands	Bermuda	Cayman Islands	Southern Ocean, South Atlantic, North-western Atlantic	Distribution	Seabirds	Used tracking data to model habitat utilisation across Atlantic
Quillfeldt, P., et al. (2017). "Does genetic structure reflect differences in non-breeding movements? A case study in small, highly mobile seabirds." Bmc Evolutionary Biology 17.	2017	Falkland Islands	SGSSI	NA	NA	NA	NA	NA	South Atlantic, Southern Ocean	Distribution	Seabirds	Evaluated population genetic structure for different breeding populations of Blue petrel, Antarctic prion, and thin-billed prion against distribution
Petersen, E. D., et al. (2017). "First detection of avian influenza virus (H4N7) in Giant Petrel monitored by geolocators in the Antarctic region." Marine Biology 164(4).	2017	BAT	Falkland Islands	NA	NA	NA	NA	NA	Southern Ocean, South Atlantic	Threat	Seabirds	Tracked one Giant petrel infected with bird flu
Pereira, J. M., et al. (2017). "Using seabirds to map the distribution of elusive pelagic cephalopod species." Marine Ecology Progress Series 567: 257-262.	2017	SGSSI	Falkland Islands	NA	NA	NA	NA	NA	Southern Ocean, South Atlantic	Distribution	Seabirds	Tracked 17 wandering albatrosses over austral winter and used prey to identify distribution of cephalopods
Peach, K. E., et al. (2017). "Calcification and photophysiology responses to elevated pCO(2) in six Halimeda species from contrasting irradiance environments on Little Cayman Island reefs." Journal of Experimental Marine Biology and Ecology 486: 114-126.	2017	Cayman Islands	NA	NA	NA	NA	NA	NA	Caribbean	Threat	Macroalgae	Calification response to elevated pCO2 and irradiance
Pakhomov, E. A. and B. P. V. Hunt (2017). "Trans-Atlantic variability in ecology of the pelagic tunicate Salpa thompsoni near the Antarctic Polar Front." Deep-Sea Research Part Ii-Topical Studies in Oceanography 138: 126-140.	2017	SGSSI	NA	NA	NA	NA	NA	NA	Southern Ocean	Biology	Plankton	Investigated the distribution, density, demography and feeding dynamics of the pelagic tunicate Salpa thompsoni
Page, H. N., et al. (2017). "Net community metabolism and seawater carbonate chemistry scale non-intuitively with coral cover." Frontiers in Marine Science 4(MAY).	2017	Bermuda	NA	NA	NA	NA	NA	NA	North-western Atlantic	Biogeochemistry	Anthozoa	Examined how benthic metabolism and influence on overlying seawater chemistry changes with coral cover
Oliver, P. G. and C. F. Rodrigues (2017). "Thyasiridae (Mollusca: Bivalvia) from the Kemp Caldera hydrothermal site, South Sandwich Islands, Antarctica." Journal of Conchology 42: 267-282.	2017	SGSSI	NA	NA	NA	NA	NA	NA	Southern Ocean	Taxonomy	Mollusca	Describe two new species of thysasiridae from the Kemp Caldera hydrothermal site, South Sandwich Islands
Neal, L., et al. (2017). "Comparative marine biodiversity and depth zonation in the Southern Ocean: evidence from a new large polychaete dataset from Scotia and Amundsen seas." Marine Biodiversity: 1-21.	2017	BAT	SGSSI	NA	NA	NA	NA	NA	Southern Ocean	Taxonomy	Polychaete	Polychaete assemblages in shelf, deep-shelf and slope communities
Morais, R. A., et al. (2017). "Mob rulers and part-time cleaners: two reef fish associations at the isolated Ascension Island." Journal of the Marine Biological Association of the United Kingdom 97(4): 799-811.	2017	Ascension	NA	NA	NA	NA	NA	NA	South Atlantic	Ecology	Fish	Opportunistic observations of cleaning behaviours
Mercado Casares, B., et al. (2017). "Towards a better understanding of Southern Ocean biogeography: new evidence from benthic hydroids." Polar Biology: 1-14.	2017	BAT	SGSSI	NA	NA	NA	NA	NA	Southern Ocean	Biogeography	Hydrozoa	Biogeography using hydroids
Mejias, M. A., et al. (2017). "Distribution and at-sea behavior of Bermudan White-tailed Tropicbirds (Phaethon lepturus catesbyi) during the non-breeding season." Journal of Field Ornithology 88(2): 184-197.	2017	Bermuda	BVI	NA	NA	NA	NA	NA	North-western Atlantic, Caribbean	Distribution	Seabirds	Tagged White-tailed Tropicbird during non-breeding season
Masello, J. F., et al. (2017). "How animals distribute themselves in space: variable energy landscapes." Frontiers in Zoology 14.	2017	Falkland Islands	NA	NA	NA	NA	NA	NA	South Atlantic	Distribution	Seabirds	Foraging ecology/energy landscape of gentoo penguins
Lv, J. H., et al. (2017). "Patterns of coccolithophore pigment change under global acidification conditions based on in-situ observations at BATS site between July 1990-Dec 2008." Frontiers of Earth Science 11(2): 297-307.	2017	Bermuda	NA	NA	NA	NA	NA	NA	North-western Atlantic	Threat	Plankton	Effect of ocean acidification on coccolithophore biomass
Lourenço, S., et al. (2017). "Life cycle, distribution and trophodynamics of the lanternfish Krefftichthys anderssoni (Lönnberg, 1905) in the Scotia Sea." Polar Biology 40(6): 1229-1245.	2017	BAT	SGSSI	NA	NA	NA	NA	NA	Southern Ocean	Biology	Fish	Life cycle, distribution, and trophodynamics of the lanternfish Krefftichthyl anderssoni
Lester, S. E., et al. (2017). "Exploring stakeholder perceptions of marine management in Bermuda." Marine Policy 84: 235-243.	2017	Bermuda	NA	NA	NA	NA	NA	NA	North-western Atlantic	Management	NA	Stakeholder perceptions of marine management
Lavers, J. L. and A. L. Bond (2017). "Exceptional and rapid accumulation of anthropogenic debris on one of the world's most remote and pristine islands." Proceedings of the National Academy of Sciences of the United States of America 114(23): 6052-6055.	2017	Pitcairn	NA	NA	NA	NA	NA	NA	South Pacific	Threat	NA	Quadrat survey along transects on beach
Krause, J. W., et al. (2017). "Picoplankton contribution to biogenic silica stocks and production rates in the Sargasso Sea." Global Biogeochemical Cycles 31(5): 762-774.	2017	Bermuda	NA	NA	NA	NA	NA	NA	North-western Atlantic	Biogeochemistry	Plankton	Contribution of picocyanoplankton to Si
Klein, R. D., et al. (2017). "Antioxidant defense system and oxidative status in Antarctic fishes: the sluggish rockcod Notothenia coriiceps versus the active marbled notothen Notothenia rossii." Journal of Thermal Biology 68: 119-127.	2017	SGSSI	NA	NA	NA	NA	NA	NA	Southern Ocean	Biology	Fish	Compares the rockcod and marbled notothen metabolic activity
Juares, M. A., et al. (2017). "Breeding events of king penguin at the South Shetland Islands: has it come to stay?" Polar Biology 40(2): 457-461.	2017	SGSSI	NA	NA	NA	NA	NA	NA	Southern Ocean	Distribution	Seabirds	King penguin breeding event in South Shetland Islands - attempted range expansion?
Hughes, B. J., et al. (2017). "Estimating the extent of seabird egg depredation by introduced Common Mynas on Ascension Island in the South Atlantic." Biological Invasions 19(3): 843-857.	2017	Ascension	NA	NA	NA	NA	NA	NA	South Atlantic	Threat	Seabirds	Seabird egg depredation on Ascension by invasive species, Common Mynas
Hughes, B. J., et al. (2017). "Long-term population trends of Sooty Terns Onychoprion fuscatus: implications for conservation status." Population Ecology: 1-12.	2017	Ascension	NA	NA	NA	NA	NA	NA	South Atlantic	Management	Seabirds	Sooty tern population on Ascension
Hoppe, C. J. M., et al. (2017). "Controls of primary production in two phytoplankton blooms in the Antarctic Circumpolar Current." Deep-Sea Research Part Ii-Topical Studies in Oceanography 138: 63-73.	2017	SGSSI	NA	NA	NA	NA	NA	NA	Southern Ocean	Biogeochemistry	Plankton	Carbon sequestration linked to phytoplankton blooms
Herman, R. W., et al. (2017). "Seasonal consistency and individual variation in foraging strategies differ among and within Pygoscelis penguin species in the Antarctic Peninsula region." Marine Biology 164(5).	2017	BAT	SGSSI	NA	NA	NA	NA	NA	Southern Ocean	Ecology	Seabirds	Feeding ecology of Adelie, chinstrap and gentoo penguins
Haver, S. M., et al. (2017). "The not-so-silent world: measuring Arctic, Equatorial, and Antarctic soundscapes in the Atlantic Ocean." Deep-Sea Research Part I-Oceanographic Research Papers 122: 95-104.	2017	BAT	Ascension	NA	NA	NA	NA	NA	Southern Ocean, South Atlantic	Threat	Mammalia	Compared ambient, fin and blue whale soundscapes in the Atlantic
Handley, J. M., et al. (2017). "Jack of all prey, master of some: influence of habitat on the feeding ecology of a diving marine predator." Marine Biology 164(4).	2017	Falkland Islands	NA	NA	NA	NA	NA	NA	South Atlantic	Ecology	Fish	Feeding ecology of gentoo penguins
Gregory, S., et al. (2017). "Demersal fish communities of the shelf and slope of South Georgia and Shag Rocks (Southern Ocean)." Polar Biology 40(1): 107-121.	2017	SGSSI	NA	NA	NA	NA	NA	NA	Southern Ocean	Ecology	Fish	Deep-water demersal fish communities
Granadeiro, J. P., et al. (2017). "Albatrosses bathe before departing on a foraging trip: implications for risk assessments and marine spatial planning." Bird Conservation International: 1-8.	2017	Falkland Islands	NA	NA	NA	NA	NA	NA	South Atlantic	Distribution	Seabirds	Black-browed albatross
Goodall-Copestake, W. P. (2017). "One tunic but more than one barcode: evolutionary insights from dynamic mitochondrial DNA in Salpa thompsoni (Tunicata: Salpida)." Biological Journal of the Linnean Society 120(3): 637-648.	2017	BAT	SGSSI	NA	NA	NA	NA	NA	Southern Ocean	Genetics	Plankton	Salpa thompsoni DNA sampling linked to blooms
Gofas, S., et al. (2017). "A national checklist of marine Mollusca in Spanish waters." Scientia Marina 81(2): 241-254.	2017	Gibraltar	NA	NA	NA	NA	NA	NA	Mediterranean	Taxonomy	Mollusca	Mollusc species checklist for Spanish waters but ESAL region includes Gibraltar
Figuerola, B., et al. (2017). "Bryozoan diversity around the Falkland and South Georgia Islands: overcoming Antarctic barriers." Marine Environmental Research 126: 81-94.	2017	Falkland Islands	SGSSI	NA	NA	NA	NA	NA	South Atlantic	Biodiversity stocktake	Bryozoa	Bryozoan diversity
Esteban, N., et al. (2017). "How numbers of nesting sea turtles can be overestimated by nearly a factor of two." Proceedings of the Royal Society B-Biological Sciences 284(1849).	2017	BIOT	NA	NA	NA	NA	NA	NA	Indian Ocean	Management	Chelonioidea	Population estimate of green turtles tracked throughout nesting season in Chagos Archipelago
Dias, M. P., et al. (2017). "Using globally threatened pelagic birds to identify priority sites for marine conservation in the South Atlantic Ocean." Biological Conservation 211: 76-84.	2017	Tristan	NA	NA	NA	NA	NA	NA	South Atlantic	Management	Seabirds	Tracking of 6 species of seabird to identify important areas for MPA design
de Putron, S. J., et al. (2017). "Variation in larval properties of the Atlantic brooding coral Porites astreoides between different reef sites in Bermuda." Coral Reefs 36(2): 383-393.	2017	Bermuda	NA	NA	NA	NA	NA	NA	North-western Atlantic	Biology	Anthozoa	Porites astreoides larval phenotypic variation
Darling, E. S., et al. (2017). "Relationships between structural complexity, coral traits, and reef fish assemblages." Coral Reefs 36(2): 561-575.	2017	BIOT	NA	NA	NA	NA	NA	NA	Indian Ocean	Ecology	Comprehensive	Reef complexity strongest predictor of fish abundance, biomass, species richness, and trophic structure
Christiansen, F., et al. (2017). "Diel and seasonal patterns in activity and home range size of green turtles on their foraging grounds revealed by extended Fastloc-GPS tracking." Marine Biology 164(1).	2017	BIOT	NA	NA	NA	NA	NA	NA	Indian Ocean	Distribution	Chelonioidea	Examined spatio-temporal patterns in green turtle home range
Calì, F., et al. (2017). "Life history traits of Notothenia rossii and N. coriiceps along the southern Scotia Arc." Polar Biology 40(7): 1409-1423.	2017	BAT	SGSSI	NA	NA	NA	NA	NA	Southern Ocean	Biology	Fish	Compared life history traits between Notothenia rossii and N. coriiceps
Burg, T. M., et al. (2017). "Genetic population structure of black-browed and Campbell albatrosses, and implications for assigning provenance of birds killed in fisheries." Aquatic Conservation: Marine and Freshwater Ecosystems.	2017	Falkland Islands	SGSSI	NA	NA	NA	NA	NA	South Atlantic, Southern Ocean	Management	Seabirds	Surveyed black-browed albatrosses killed in longline fisheries and used DNA to identify the breeding population they were from
Brigden, K. E., et al. (2017). "Interannual variability in reproductive traits of the Patagonian toothfish Dissostichus eleginoides around the sub-Antarctic island of South Georgia." Journal of Fish Biology 91(1): 278-301.	2017	SGSSI	NA	NA	NA	NA	NA	NA	Southern Ocean	Biology	Fish	Identified key reproductive traits and spawning dynamics of Patagonian toothfish, as well as fisheries impact (later maturity, decreased body size, reduced number large spawning individuals)
Bester, M. N., et al. (2017). "Vagrant leopard seal at Tristan da Cunha Island, South Atlantic." Polar Biology: 1-3.	2017	Tristan	NA	NA	NA	NA	NA	NA	South Atlantic	Distribution	Mammalia	Report of a vagrant leopard seal
Bedwell-Ivers, H. E., et al. (2017). "The role of in hospite zooxanthellae photophysiology and reef chemistry on elevated pCO(2) effects in two branching Caribbean corals: Acropora cervicornis and Porites divaricata." Ices Journal of Marine Science 74(4): 1103-1112.	2017	Cayman Islands	NA	NA	NA	NA	NA	NA	Caribbean	Threat	Anthozoa	Response of zooxanthellae photosynthesis and coral calification response to CO2 enrichment
Baylis, A. M. M., et al. (2017). "Habitat use and spatial fidelity of male South American sea lions during the nonbreeding period." Ecology and Evolution 7(11): 3992-4002.	2017	Falkland Islands	NA	NA	NA	NA	NA	NA	South Atlantic	Distribution	Mammalia	13 adult male and 6 juveniles tagged at Falkland islands to assess habitat use
Bates, N. R. (2017). "Twenty years of marine carbon cycle observations at Devils Hole Bermuda provide insights into seasonal hypoxia, coral reef calcification, and ocean acidification." Frontiers in Marine Science 4(FEB).	2017	Bermuda	NA	NA	NA	NA	NA	NA	North-western Atlantic	Biogeochemistry	Anthozoa	Examine response of reef to OA
Barnes, D. K. A. and C. J. Sands (2017). "Functional group diversity is key to Southern Ocean benthic carbon pathways." Plos One 12(6):e0179735.	2017	SGSSI	NA	NA	NA	NA	NA	NA	Southern Ocean	Biogeochemistry	Comprehensive	Examined relationship between functional group composition and benthic accumulative, immobilisation and burial pathway to carbon sequestration
Balushkin, A. V. and M. V. Moganova (2017). "New species of pelagic eelpouts of the genus Melanostigma (Zoarcidae) from Western Antarctica." Journal of Ichthyology 57(2): 171-176.	2017	SGSSI	NA	NA	NA	NA	NA	NA	Southern Ocean	Taxonomy	Fish	Describes new species of eelpout
Baker, D. M., et al. (2017). "Investigating Bermuda's pollution history through stable isotope analyses of modern and museum-held gorgonian corals." Marine Pollution Bulletin 114(1): 169-175.	2017	Bermuda	NA	NA	NA	NA	NA	NA	North-western Atlantic	Threat	Anthozoa	Quantifies pollution in sea fan and links to management
Arkhipkin, A., et al. (2017). "Variability in age and growth of common rock oyster Saccostrea cucullata (Bivalvia) in Ascension Island (central-east Atlantic)." Journal of the Marine Biological Association of the United Kingdom 97(4): 735-742.	2017	Ascension	NA	NA	NA	NA	NA	NA	South Atlantic	Biology	Mollusca	Examines life history parameters for the common rock oyster
Alger, J. and P. Dauvergne (2017). "The politics of Pacific Ocean conservation: lessons from the Pitcairn Islands Marine Reserve." Pacific Affairs 90(1): 29-50.	2017	Pitcairn	NA	NA	NA	NA	NA	NA	South Pacific	Management	NA	Interviews on LSMPAs
Nolan, E. T., et al. (2017). "Biological and physical characterization of the seabed surrounding Ascension Island from 100-1000 m." Journal of the Marine Biological Association of the United Kingdom 97(4): 647-659.	2017	Ascension	NA	NA	NA	NA	NA	NA	South Atlantic	Biodiversity stocktake	Comprehensive	Mapping bathymetry, documenting benthic assemblages
Jordao, J. C., et al. (2017). "Mixed-stock analysis in green turtles Chelonia mydas: mtDNA decipher current connections among west Atlantic populations." Mitochondrial DNA Part A 28(1-2): 197-207.	2017	Ascension	NA	NA	NA	NA	NA	NA	South Atlantic	Biology	Chelonioidea	Ascension Island documented as a population source for foraging aggregations in the Southwest/east Atlantic and eastern Caribbean
Schwabe, E. and K. Tsiamis (2017). "Just undiscovered or invasive? the first record of a chiton (Mollusca: Polyplacophora) from the remote Ascension Island, southern Atlantic Ocean." Journal of the Marine Biological Association of the United Kingdom 97(4): 727-733.	2017	Ascension	NA	NA	NA	NA	NA	NA	South Atlantic	Taxonomy	Mollusca	Description of a new chiton species
